1 **The RecA-directed recombination pathway of natural transformation initiates**  
2 **at chromosomal replication forks in *Streptococcus pneumoniae***

3 Calum JOHNSTON<sup>1,2</sup>, Rachel HOPE<sup>1,2,3</sup>, Anne-Lise SOULET<sup>1,2</sup>, Marie DEWAILLY<sup>1,2</sup>, David DE LEMOS<sup>1,2</sup>,  
4 Patrice POLARD<sup>1,2</sup>.

5 1. Laboratoire de Microbiologie et Génétique Moléculaires (LMGM), UMR5100, Centre de Biologie Intégrative (CBI), Centre  
6 Nationale de la Recherche Scientifique (CNRS), Toulouse, France.

7 2. Université Paul Sabatier (Toulouse III), Toulouse, France.

8 3. Department of Life Sciences, Imperial College, London, U. K.

9

10 **Keywords :** *Streptococcus pneumoniae*, genetic transformation, homologous DNA recombination,  
11 DprA, RecA, DNA replication, replisome.

12

13

14

15

16

17

18

19

20

21

## 22 **Abstract**

23 Homologous recombination (HR) is a crucial mechanism of DNA strand exchange that  
24 promotes genetic repair and diversity in all kingdoms of life. Bacterial HR is driven by the  
25 universal recombinase RecA, assisted by dedicated mediators that promote its polymerization  
26 on single-stranded DNA (ssDNA). In bacteria, natural transformation is a prominent HR-driven  
27 mechanism of horizontal gene transfer specifically dependent on the conserved DprA  
28 recombination mediator. Transformation involves internalisation of exogenous DNA as  
29 ssDNA, followed by its integration into the chromosome by RecA-directed HR. How DprA-  
30 mediated RecA filamentation on transforming ssDNA is spatiotemporally coordinated with  
31 other cellular processes remains unknown. Here, we tracked the localisation of functional  
32 fluorescent fusions to DprA and RecA in *Streptococcus pneumoniae* and revealed that both  
33 accumulate in an interdependent manner with internalised ssDNA at replication forks. In  
34 addition, dynamic RecA filaments were observed emanating from replication forks, even with  
35 heterologous transforming DNA, which probably represent chromosomal homology search.  
36 In conclusion, this unveiled interaction between HR transformation and replication  
37 machineries highlights an unprecedented role for replisomes in anchoring transforming  
38 ssDNA to the chromosome, which would define a pivotal early HR step for its chromosomal  
39 integration.

40

41

42

43

## 44 **Introduction**

45 Homologous recombination (HR) is a universal DNA strand exchange mechanism,  
46 which is vital to genome biology *via* its implication in specific pathways of DNA repair and  
47 genetic diversification<sup>1-4</sup>. The widely conserved recombinases of the RecA/Rad51 family are  
48 core HR effectors that form dynamic nucleofilaments to promote exchange between  
49 complementary DNA sequences<sup>5</sup>. These reactions are controlled and assisted by specific  
50 effectors, which define different HR pathways across all kingdoms of life. Any dysfunction in  
51 these HR assistants can alter cell development, threaten the integrity or adaptive capacity of  
52 the genome and endanger cell survival<sup>1,6,7</sup>.

53 Natural transformation is a programmed HR-directed horizontal gene transfer  
54 mechanism that is widespread in bacteria and promotes the shuffling of chromosomally-  
55 encoded genetic information<sup>8</sup>. As such, transformation facilitates adaptive responses to  
56 stresses, including the acquisition of new genetic traits such as antibiotic resistance and  
57 vaccine escape<sup>8-10</sup>, as well as limiting the genetic drift of species by curing genomes of mobile  
58 genetic elements<sup>11-14</sup>.

59 Transformation is a multistep DNA processing mechanism directed by proteins  
60 encoded by the recipient cell (**Figure 1A**). Most of these are expressed during a distinct  
61 physiological state, defined as competence, which is triggered and regulated in different ways  
62 depending on the species<sup>8</sup>. Transformation proteins first direct the uptake of exogenous  
63 double-stranded DNA (dsDNA) through the cell envelope to the periplasmic space<sup>15-18</sup>; next,  
64 they couple transport of a linear single-stranded DNA (ssDNA) strand across the cell  
65 membrane with degradation of its complementary strand<sup>16,19-22</sup>; internalised ssDNA is then  
66 integrated into the genome by RecA-directed HR at homology sites. A key conserved early

67 effector of the HR pathway of transformation is the ssDNA-binding protein DprA, which  
68 specifically interacts with RecA to mediate its loading onto ssDNA<sup>23–25</sup>. Next, as in all HR  
69 pathways, RecA polymerises on the ssDNA to form a nucleofilament, referred to as the  
70 presynaptic filament, and promotes homology search in chromosomal DNA and pairing with  
71 a complementary DNA strand to generate a 3-stranded DNA molecule, defined as the HR  
72 heteroduplex, synapse or D-loop. Next, an helicase involved in extending ssDNA incorporation  
73 in the genome from the D-loop, which differs from one species to another. In firmicutes, this  
74 HR motor is RadA, a protein which also acts with RecA in pathways of DNA repair<sup>26,27</sup>. In  
75 contrast, a transformation-dedicated helicase ComM is conserved in all other bacterial  
76 species<sup>28</sup>. The final reactions of transformation, including covalent linkage and integration of  
77 the paired ssDNA molecule with the recipient chromosomal dsDNA, remain uncharacterised.  
78 Ultimately, a replication cycle generates a wildtype and a transformed chromosome, each  
79 segregated into a daughter cell.

80 Our current understanding of the transformation mechanism results from studies  
81 conducted in a dozen distinct species, including the historical models *Bacillus subtilis* and  
82 *Streptococcus pneumoniae* (the pneumococcus), as well as many other human pathogens  
83 such as *Haemophilus influenzae*, *V. cholerae* and *Helicobacter pylori* (for reviews, see<sup>8,29</sup>).  
84 These studies highlighted important general features of transformation, including the  
85 remarkable speed at which transforming DNA (tDNA) is captured, internalised and integrated  
86 into the chromosome. This was shown to occur in a minute time frame in *S. pneumoniae* and  
87 *V. cholerae*<sup>30,31</sup>. How the HR system of transformation achieves such efficiency is unexplained.  
88 Pioneering studies in *B. subtilis* reported the gradual and stable accumulation of GFP fusions  
89 to transformation proteins involved in tDNA uptake and ssDNA transport, as well as RecA, at  
90 one pole of competent cells independent of tDNA addition<sup>32,33</sup>. In the presence of tDNA, polar



91 RecA evolved into filaments proposed to represent presynaptic filaments formed during the  
92 polar entry of ssDNA, which next scan chromosomal DNA for homology<sup>33,34</sup>.

93 Here, we investigated DprA and RecA localisation dynamics during transformation in  
94 *S. pneumoniae*. In stark contrast to *B. subtilis*, in which competence occurs in non-replicating  
95 cells and lasts for several hours, pneumococcal competence occurs during the exponential  
96 phase of growth for a short period of about 30 minutes<sup>35</sup>. In addition, tDNA is captured and  
97 enters competent *S. pneumoniae* cells not at the pole but at midcell<sup>36,37</sup>. Using functional  
98 fluorescent fusions of DprA and RecA, we tracked the early HR intermediates of  
99 transformation in actively transforming pneumococcal cells. Both proteins formed distinct  
100 foci at midcell in transforming cells, dependent on their physical interaction, showing that  
101 these nucleoprotein assemblies represent early HR intermediates of transformation.  
102 Furthermore, DprA and RecA foci were proven to localise to chromosomal replication forks.  
103 Importantly, RecA was observed to form short, dynamic filaments emanating from this  
104 replisomal accumulation point, possibly revealing homology search on the chromosome.  
105 These results represent an unprecedented link between the HR machinery of natural  
106 transformation and the chromosomal replication apparatus, shedding light on the mechanism  
107 of targeted homology search on the chromosome during pneumococcal transformation.

108

109

110

111

112

## 113 **Results**

### 114 ***DprA accumulates at midcell during transformation in S. pneumoniae***

115 To observe the early DprA-mediated HR steps of natural transformation in individual  
116 living competent pneumococcal cells, we tracked the localisation of a fluorescent DprA-GFP  
117 fusion proven to be fully functional in transformation assays<sup>38</sup>. Purified DprA-GFP was as  
118 efficient as DprA in assisting RecA-directed HR in an *in vitro* D-loop assay (**Extended Figure 1**),  
119 validating use of this fusion for analysing DprA localisation dynamics during transformation.  
120 We previously showed that DprA-GFP accumulated at a single cell pole in competent cells<sup>38</sup>.  
121 This localisation was related to an additional role for DprA in shut-off of pneumococcal  
122 competence. This negative feedback loop is independent of the ability of competent cells to  
123 uptake tDNA but dependent on a high cellular concentration of DprA<sup>38,39</sup>. Here, we analysed  
124 DprA-GFP localisation upon addition of tDNA to competent, transformable pneumococcal  
125 cells. Competence was induced by incubating cells with saturating levels (100 ng mL<sup>-1</sup>) of  
126 synthetic competence-stimulating peptide (CSP) for 10 minutes<sup>40</sup>, ensuring all cells in the  
127 population were competent. Addition of saturating levels of tDNA (250 ng μL<sup>-1</sup>) then ensured  
128 all cells were engaging in transformation. Cells were visualised 5 minutes after tDNA addition  
129 and compared with cells without tDNA. DprA-GFP formed foci in competent cells, irrespective  
130 of the addition of tDNA (**Figure 1B**). The frequency and cellular localisation of DprA-GFP foci,  
131 presented as focus density maps ordered by cell length (**Figure 1C**), showed that addition of  
132 tDNA did not modify the frequency of foci in competent cells but slightly altered their  
133 localisation (**Figure 1D**), with a significant increase of midcell foci from 13 % to 25 % (**Figure**  
134 **1E**). These results suggested that DprA-GFP may interact with internalised ssDNA to generate  
135 midcell foci.

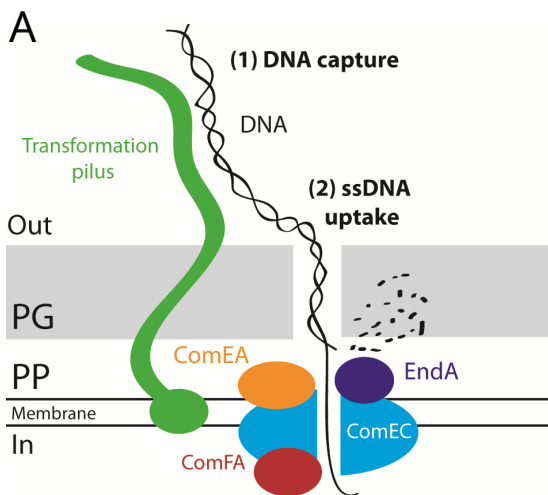

**(3) ssDNA protection and DprA-mediated RecA filamentation**

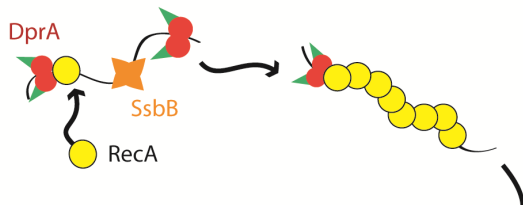

**(4) Homology search and ssDNA pairing**

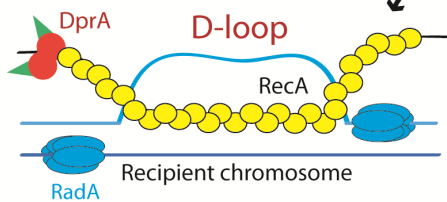

**(5) Integrative resolution into daughter chromosomes**

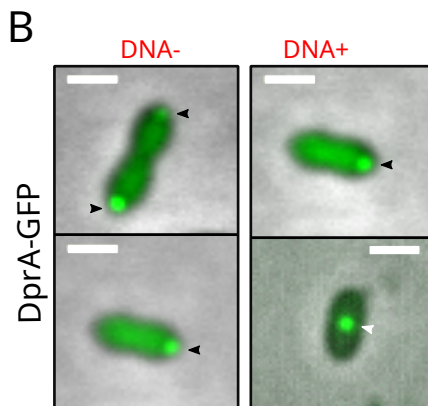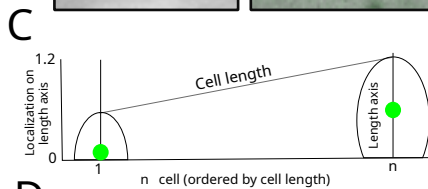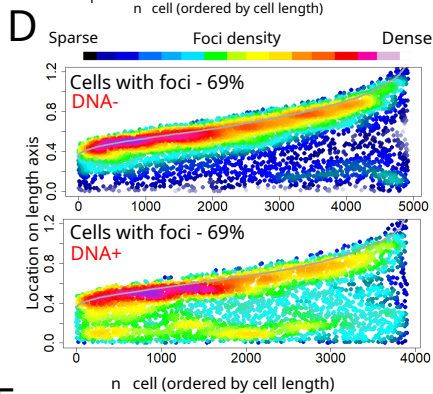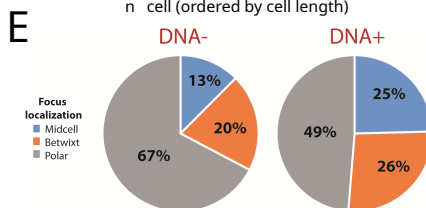

**Figure 1: DprA and homologous recombination during transformation.** (A) Schematic representation of the steps involved in pneumococcal transformation (1) DNA capture. DNA is captured by a long transformation pilus, formed from the ComG proteins, and transferred to the DNA receptor ComEA. (2) ssDNA uptake. ComEA transfers the DNA to EndA, which degrades one strand of DNA, with the remaining single strand pulled through the ComEC transformation pore by the ComFA ATPase. (3) ssDNA protection and DprA-mediated RecA filamentation. Once internalised, ssDNA interacts with SsbB and the RMP DprA, which loads RecA onto the DNA. Polymerization of RecA along the ssDNA generates the early HR intermediate known as the presynaptic filament. (4) Homology search and ssDNA pairing. The presynaptic filament interacts with the chromosome in an unknown manner, and RecA promotes homology search. Once homology is found, the homologous strand of the recipient chromosome is displaced, and RecA facilitates pairing between the transforming ssDNA and the complementary strand, forming the so-called displacement loop (D-loop). D-loop extension is facilitated by the helicase RadA which unwinds the recipient chromosome on either side of the D-loop. (5) Integrative resolution into daughter chromosomes. The D-loop structure is resolved by the passage of the replication machinery, generating one transformed and one untransformed daughter chromosome. (B) Sample fluorescence microscopy images of R3728 strain (*comCO*, *dprA-gfp*) producing DprA-GFP 15 minutes after competence induction and 5 minutes after DNA addition (250 ng  $\mu\text{L}^{-1}$ ). Scale bars, 1  $\mu\text{m}$ . Black arrows, polar DprA-GFP foci; white arrows, midcell DprA-GFP foci. (C) Schematic representation of focus density maps with half cells represented as vertical lines in ascending size order and localisation of foci represented along the length axis of each half cell. (D) Addition of transforming DNA shifts the localisation profile of DprA-GFP foci towards midcell. Data represented as focus density maps plotted on the longitudinal axis of half cells ordered by cell

length. Each spot represents the localisation of an individual focus, and spot colour represents focus density at a specific location on the half cell. Cells with >0 foci shown for each time point. In cells possessing >1 foci, foci were represented adjacently on cells of the same length. DNA-, 5,739 cells and 4,920 foci analysed; DNA+, 3,406 cells and 3,899 foci analysed. (E) localisation of DprA-GFP foci split into three categories on a half-cell of arbitrary length 1 where midcell is 0 and the pole is 1. Midcell, 0-0.3; betwixt, 0.3-0.7; polar, 0.7-1.

136 We showed previously using a strain expressing *dprA* under the control of an IPTG-  
137 inducible  $P_{lac}$  promoter ( $CEP_{lac-dprA}$ ) and lacking native *dprA* that reducing cellular levels of  
138 DprA in competent cells prevented competence shut-off from occurring whilst maintaining  
139 optimal transformation efficiency<sup>39</sup>. Using a  $CEP_{lac-dprA-gfp}$  fusion, we also showed that in  
140 similar conditions (6  $\mu$ M IPTG), no polar foci of DprA-GFP were observed<sup>38</sup>. We took  
141 advantage of this strain and these conditions to visualise DprA-GFP during transformation as  
142 described above, with 48% of cells possessing DprA-GFP foci, mostly at midcell (**Figures 2AB**).  
143 By contrast, only 7% of cells possessed foci in the absence of tDNA, in agreement with  
144 previous results<sup>38</sup>. Most cells present DprA-GFP foci at midcell, while late dividing cells  
145 present foci at the  $\frac{1}{4}$  and  $\frac{3}{4}$  positions, future sites of midcell in daughter cells (**Figure 2B**). To  
146 explore where these tDNA-dependent DprA-GFP foci localise along the lateral axis of the cells,  
147 data was represented as heatmaps split into six cell categories. tDNA-dependent DprA-GFP  
148 foci were present near the centre of the longitudinal axis in all cell types (**Figure 2C**). In non-  
149 constricted cells they were either side of the central axis, while in constricted cells they  
150 appeared more central. Thus, DprA was found to accumulate at midcell in a tDNA dependent  
151 manner. We next analysed this localisation at different time-points after competence  
152 induction and tDNA addition. The results showed that the highest number of cells possessing  
153 tDNA-dependent DprA-GFP foci were observed 20 minutes after CSP addition, and that the  
154 majority of cells with foci possess a single focus (**Extended Figure 2A**). In addition, the  
155 localisation profile of these foci remains similar over time (**Extended Figure 2B**). Transforming  
156 cells with the same concentration of heterologous chromosomal DNA from *Escherichia coli*  
157 resulted in the formation of DprA-GFP foci at a similar frequency and localisation (**Figure 2BC**),  
158 showing that homology between tDNA and chromosomal DNA is not required for focus  
159 formation. We next examined how exogenous tDNA concentration impacted DprA-GFP focus

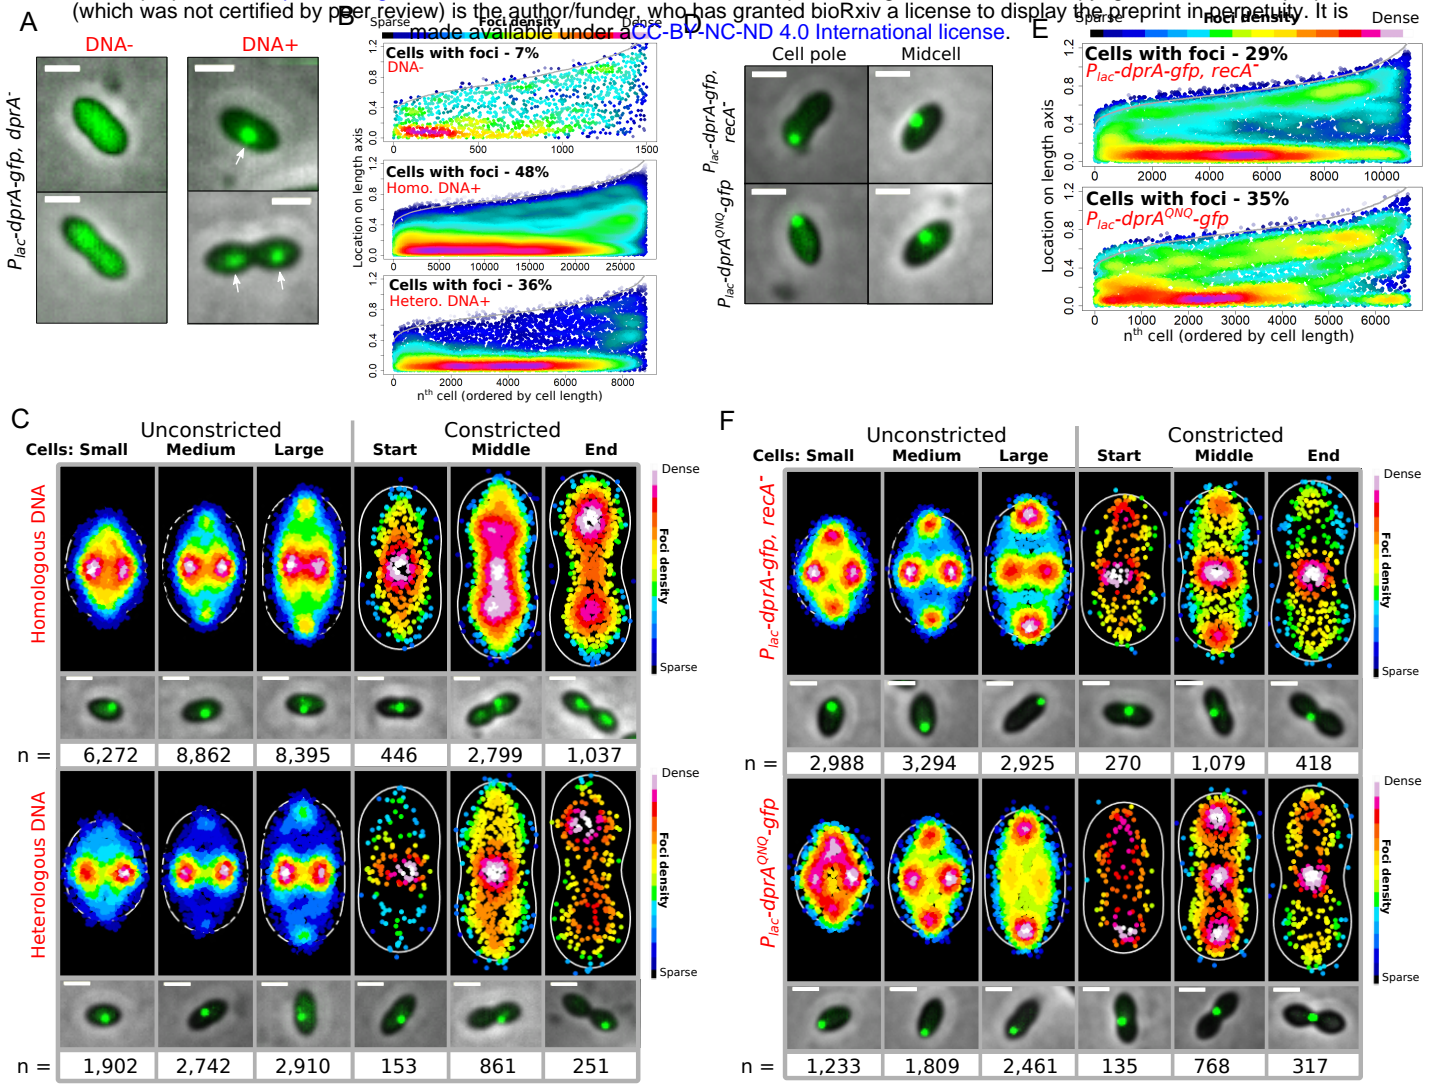



**Figure 2: When produced at low levels, DprA-GFP accumulates at midcell upon addition of transforming DNA, dependent on interaction with RecA.** (A) Sample fluorescence microscopy images of R4262 strain (*comC0*, *CEP<sub>lac</sub>-dprA-gfp*, *dprA::spc*) grown in 6  $\mu$ M IPTG to produce  $\sim$ 300 DprA-GFP dimers, 15 minutes after competence induction and 5 minutes after DNA addition (250 ng  $\mu$ L<sup>-1</sup>). Scale bars, 1  $\mu$ m. White arrows, midcell DprA-GFP foci. (B) Low level DprA-GFP accumulates at midcell upon addition of transforming DNA. Representations as focus density maps as described in [Figure 1C](#). DNA-, 21,055 cells and 1,512 foci analysed; Homologous DNA, 54,058 cells and 27,811 foci analysed; Heterologous DNA, 23,962 cells and 8,819 foci analysed. (C) Foci localisation on density heat maps with cells split into six cell cycle categories by size and constriction status (see [Materials and Methods](#)). White lines represent the average cell contour of the sample set and each spot represents an individual focus, with colour representing density. Microscopy images represent sample images of each cell category showing preferential focus localisation. Scale bars, 1  $\mu$ m. Homologous transforming DNA; Small cells, 17,888 cells and 6,272 foci analysed; medium cells, 16,744 cells and 8,862 foci analysed; large cells, 13,659 cells and 8,395 foci analysed; cons. start cells, 880 cells and 446 foci analysed; cons. middle cells, 3824 cells and 2,799 foci analysed; cons. end cells, 1063 cells and 1,037 foci analysed. Heterologous transforming DNA; Small cells, 7,557 cells and 1,902 foci analysed; medium cells, 7,562 cells and 2,742 foci analysed; large cells, 6,318 cells and 2,910 foci analysed; cons. start cells, 377 cells and 153 foci analysed; cons. middle cells, 1,708 cells and 861 foci analysed; cons. end cells, 440 cells and 251 foci analysed. (D) Sample fluorescence microscopy images of low level DprA-GFP foci within cells of R4415 (*comC0*, *CEP<sub>lac</sub>-dprA<sup>QNO</sup>-gfp*, *dprA::spc*) and R4429 (*comC0*, *CEP<sub>lac</sub>-dprA-gfp*, *dprA::spc*, *recA::cat*) strains 15 minutes after competence induction and 5 minutes after DNA addition (250 ng  $\mu$ L<sup>-1</sup>). Scale bars, 1  $\mu$ m. (E) Low level DprA-GFP foci change localisation profile in the absence of *recA* of in



a *dprA<sup>QNO</sup>-gfp* mutant which cannot interact with RecA. Representations focus density maps as described in **Figure 1C**. R4415, 7,912 cells and 6,723 foci analysed, R4429, 35,318 cells and 10,974 foci analysed. (F) Foci localisation on density heat maps as described in *panel C* for R4415 (*comC0*, *CEP<sub>lac</sub>-dprA<sup>QNO</sup>-gfp*, *dprA::spc*) and R4429 (*comC0*, *CEP<sub>lac</sub>-dprA-gfp*, *dprA::spc*, *recA::cat*) strains. Data used as in *panel E*. Microscopy images represent sample images of each cell category showing preferential focus localisation. Scale bars, 1  $\mu$ m. R4415: Small cells, 2,729 cells and 1,233 foci analysed; medium cells, 2,180 cells and 1,809 foci analysed; large cells, 2,132 cells and 2,461 foci analysed; cons. start cells, 131 cells and 135 foci analysed; cons. middle cells, 559 cells and 768 foci analysed; cons. end cells, 181 cells and 317 foci analysed. R4429: Small cells, 14,338 cells and 2,988 foci analysed; medium cells, 9,534 cells and 3,294 foci analysed; large cells, 7,508 cells and 2,925 foci analysed; cons. start cells, 727 cells and 270 foci analysed; cons. middle cells, 2,534 cells and 1,079 foci analysed; cons. end cells, 740 cells and 418 foci analysed.

160 formation. Results showed that a 1,000-fold reduction in tDNA concentration, starting from  
161 saturating conditions ( $250 \text{ ng } \mu\text{L}^{-1}$ ), reduced the frequency of cells exhibiting midcell DprA-  
162 GFP foci from 47 % to 17 % (**Extended Figure 2C**). This suggests that the more ssDNA enters  
163 each cell, the more DprA-GFP molecules accumulate at midcell to generate detectable  
164 fluorescent foci. In conclusion, pneumococcal DprA accumulates at two distinct locations in  
165 competent cells, correlating with its two roles in competence and transformation. First, as  
166 reported previously<sup>38</sup>, the majority of DprA accumulates at one cell pole to mediate  
167 competence shut-off. Second, as observed here, a minority of DprA accumulates at midcell in  
168 a tDNA-dependent manner. This clustering of DprA at midcell appears therefore to be related  
169 to its role in transformation.

170

#### 171 ***DprA anchoring at midcell is dependent on RecA***

172 To gain further insight into the formation of tDNA-dependent DprA-GFP foci at midcell  
173 in competent cells, we reproduced these localisation experiments in strains disrupted in three  
174 genes involved in different stages of the transformation process, *i.e.* *comEC*, *ssbB* and *radA*.  
175 ComEC is proposed to form a channel in the cell membrane enabling ssDNA transfer into the  
176 cytoplasm<sup>41</sup>. Only 2 % of *comEC* cells exhibited tDNA-dependent DprA-GFP foci,  
177 demonstrating that assembly of these foci depends on tDNA internalisation (**Extended Figure**  
178 **2D**). Of note, it can be inferred from this result that DprA-GFP foci in competent cells grown  
179 without tDNA (**Figure 2**) result from the internalisation of DNA released in the medium from  
180 lysed cells. SsbB contributes to the protection and storage of internalised ssDNA to foster  
181 multiple chromosomal recombination events<sup>42,43</sup>, and RadA is a helicase that extends ssDNA  
182 integration at RecA-directed D-loop intermediates<sup>26</sup>. Despite these key roles in

183 transformation, neither was found to be involved in midcell DprA-GFP foci formation  
184 (Extended Figure 3).

185 Next, we further explored DprA-GFP localisation with two DprA point mutants, both  
186 severely impaired in transformation and differentially altered in DprA properties: DprA<sup>AR</sup>,  
187 defective in dimerisation and cooperative interaction with ssDNA and DprA<sup>QNO</sup>, disrupted in  
188 RecA interaction<sup>24</sup>. Only 2 % of transforming cells expressing the DprA<sup>AR</sup>-GFP fusion from the  
189 ectopic *P<sub>lac</sub>-dprA<sup>AR</sup>-gfp* construct possessed foci (Extended Figure 2D). In contrast, the  
190 DprA<sup>QNO</sup>-GFP fusion still formed tDNA-dependent midcell foci. However, these were observed  
191 in fewer cells than in an isogenic wildtype DprA-GFP fusion and their localisation appeared  
192 markedly different (Figure 2DE and Extended Figure 2E). This difference can be clearly seen  
193 when the data is represented as heatmaps, with cells split into six size categories. DprA<sup>QNO</sup>-  
194 GFP accumulated at the extremities of the lateral cellular axis in small and medium sized cells,  
195 and at cell poles in large cells or at the constriction site and/or at the pole in constricted cells  
196 (Extended Figure 2F). Thus, the localisation patterns of DprA-GFP and DprA<sup>QNO</sup>-GFP foci  
197 markedly differ: the later appear to be excluded from the cellular areas where the former  
198 form. This result strongly suggested that DprA interaction with RecA is key for the tDNA-  
199 dependent midcell accumulation of DprA-GFP. To confirm this, we repeated the experiment  
200 with the wildtype DprA-GFP fusion in a *recA*<sup>-</sup> mutant, and results were similar to those  
201 observed with DprA<sup>QNO</sup>-GFP (Figure 2DEF and Extended Figure 2E). These results show that  
202 the accumulation of DprA-GFP at midcell depends on DprA interaction with RecA and tDNA.  
203 Thus, this midcell accumulation point appears to attract a trio of cross-interacting partners,  
204 i.e. DprA, RecA and tDNA. Importantly, when RecA or DprA are absent, most internalised  
205 ssDNA molecules are rapidly degraded<sup>30</sup>. Transforming cells of a *recA comEC* double mutant  
206 showed almost no DprA-GFP foci (Extended Figure 2FG). This suggested that sufficient

207 internalised ssDNA remains protected by DprA within *recA*<sup>-</sup> competent cells to enable DprA-  
208 GFP foci formation. Together, these results show that RecA drives midcell localisation of DprA-  
209 GFP foci.

210

### 211 ***RecA accumulates at midcell during transformation.***

212 The dependency on RecA for the midcell localisation of DprA-GFP foci during  
213 transformation led us to analyse RecA localisation in competent cells. However, a *recA*-  
214 *mturquoise* fluorescent gene fusion generated at the native *recA* locus, despite being  
215 produced at wild type levels, was only partially functional in directing transformation and  
216 recombination repair of chromosomal damages (**Extended Figure 4**). In addition, this RecA-  
217 mTurquoise fusion accumulated at the cell poles during competence and generated DprA foci  
218 at this cell location when *dprA-yfp* was expressed at low concentrations, which were not  
219 formed in a RecA<sup>+</sup> background (**Extended Figure 5**). In an attempt to visualise RecA localisation  
220 under fully functional recombination conditions, we placed the *recA-mturquoise* construct  
221 under the control of IPTG-inducible P<sub>lac</sub> promoter at the ectopic chromosomal CEP locus,  
222 allowing the production of a mixture of RecA and RecA-mTurquoise proteins in the cells, a  
223 strategy successfully used in various species<sup>44-46</sup>. This merodiploid strain, referred to as  
224 *recA/recA-mturquoise*, was equally as proficient in transformation and genome maintenance  
225 as the wildtype strain (**Extended Figure 4**). In this context, we found that RecA-mTurquoise  
226 accumulates into fluorescent foci at midcell in competent cells, dependent on tDNA,  
227 displaying the same foci localisation profile as cells expressing low-level DprA-GFP in the same  
228 conditions (**Figure 3ABC**). This result strongly suggests that midcell foci represented a  
229 functional cellular localisation for RecA and DprA during transformation. **Indeed, formation of**

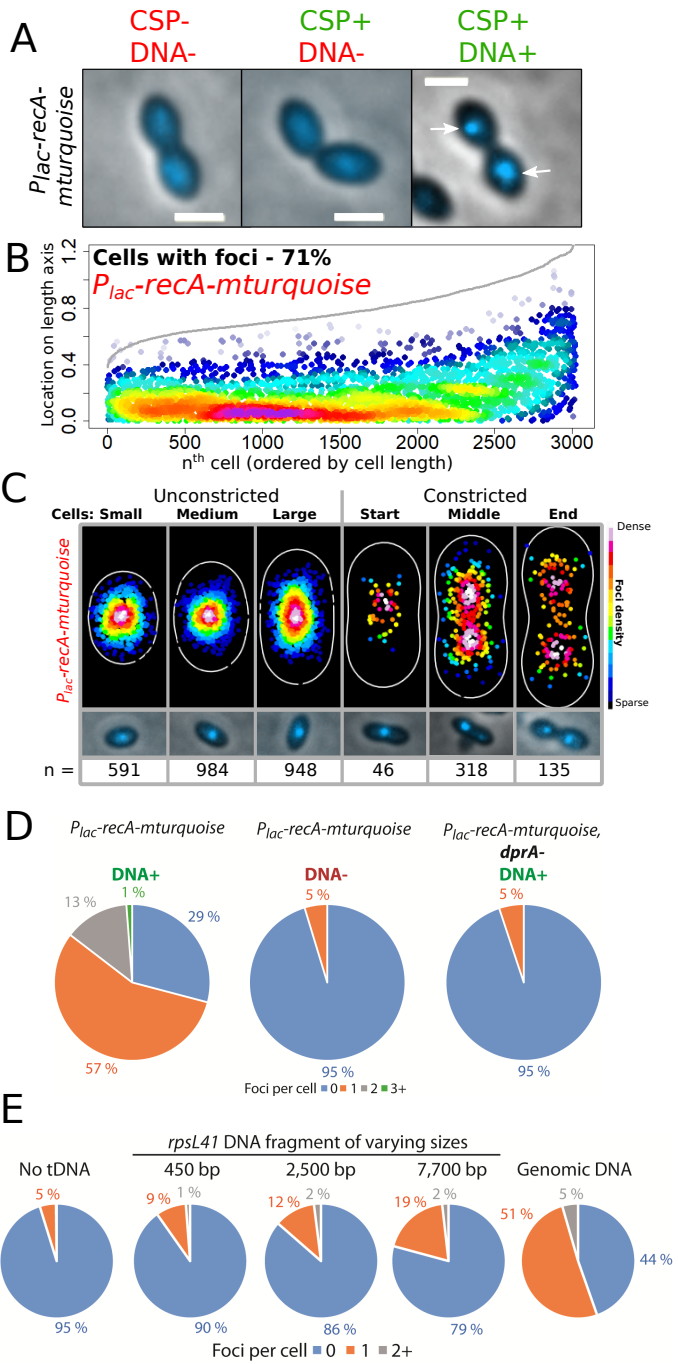

**Figure 3: Mixed filaments of RecA/RecA-mTurquoise accumulate at midcell during competence, dependent on tDNA.** (A) Sample microscopy images of RecA/RecA-mTurquoise mixed filaments in non-competent cells and competent cells in presence or absence of homologous tDNA. Images taken 15 minutes after competence induction. Strain used, R4848 (*comC0*, *P<sub>lac</sub>-recA-mturquoise*). White arrows, midcell RecA-mTurquoise foci. (B) Mixed filaments of RecA/RecA-mTurquoise accumulate at midcell, reminiscent of DprA. Representations as focus density maps as described in [Figure 1C](#). *P<sub>lac</sub>-recA-mturquoise*, 3,481 cells and 3,022 foci analysed. (C) RecA/RecA-mTurquoise mixed filaments accumulate at midcell in transforming cells. Representations on density heat maps as described in [Figure 2C](#). Microscopy images represent sample images of each cell category showing preferential focus localisation. Small cells, 923 cells and 591 foci analysed; medium cells, 1,242 cells and 984 foci analysed; large cells, 958 cells and 948 foci analysed; cons. start cells, 45 cells and 46 foci analysed; cons. middle cells, 229 cells and 318 foci analysed; cons. end cells, 84 cells and 135 foci analysed. (D) Formation of RecA-mTurquoise foci expressed from *P<sub>lac</sub>-recA-mturquoise* ectopic expression platform in merodiploid cells is dependent on transforming DNA and DprA. Strains used, *P<sub>lac</sub>-recA-mturquoise*, R4848 (*comC0*, *CEP<sub>lac</sub>-recA-mturquoise*); *P<sub>lac</sub>-recA-mturquoise*, *dprA*<sup>-</sup>, R4851, (*comC0*, *CEP<sub>lac</sub>-recA-mturquoise*, *dprA::spc*). (E) Formation of RecA-mTurquoise foci expressed from *P<sub>lac</sub>-recA-mturquoise* ectopic expression platform in merodiploid cells varies depending on the length of tDNA fragments used. Strain used, *P<sub>lac</sub>-recA-mturquoise*, R4848 (*comC0*, *CEP<sub>lac</sub>-recA-mturquoise*).

230 RecA-mTurquoise midcell foci was found to be dependent on tDNA and DprA (Figure 3D).  
231 Repeating this experiment in an IPTG gradient revealed that reducing the cellular levels of  
232 RecA-mTurquoise reduced the number of transformed competent cells with foci (Extended  
233 Figure 6). In addition, reducing the length of tDNA fragment reduced the number of cells  
234 presenting RecA-mTurquoise foci (Figure 3E). This interdependency between DprA and RecA  
235 for their midcell accumulation highlights the role of DprA in HR as a mediator of RecA loading  
236 on ssDNA at this precise cell location. Finally, we also attempted to directly visualise  
237 internalised ssDNA by fluorescent labelling as previously described in *B. subtilis*<sup>47</sup>. However,  
238 we were unable to conclusively visualise fluorescently labelled tDNA internalised in  
239 pneumococcal competent cells, which was essentially found randomly retained into multiple  
240 patches on the cell surface or in the periplasmic space as reported recently with *B. subtilis*<sup>19</sup>  
241 (See Supplementary Results and Extended Figure 7). Together, these localisation studies of  
242 DprA and RecA in transforming competent cells revealed their interdependent assembly into  
243 foci at midcell, which are functionally linked to their concerted role in directing the early HR  
244 steps of transformation.

245

#### 246 ***DprA and RecA colocalise with chromosomal DNA replication forks in transforming cells.***

247 The localisation of midcell tDNA-dependent DprA-GFP and RecA-mTurquoise foci was  
248 very similar to the localisation of the replication forks of the chromosome tracked by using  
249 fusions to proteins of the replisome<sup>48</sup>. To explore whether these foci colocalised with  
250 chromosomal replication forks, a strain was generated allowing controlled, ectopic expression  
251 of both the replisomal DnaX protein fused to YFP (*CEP<sub>M</sub>-yfp-dnaX*; induced by maltose) and  
252 DprA-mTurquoise (*CEP<sub>II</sub><sub>lac</sub>-dprA-mturquoise*; induced by IPTG). Firstly, 81 % (+/- 3,9 %) of non-

253 competent cells possessed at least one YFP-DnaX focus, while this was slightly reduced to 73  
254 % (+/- 1,6 %) in competent cells 20 minutes after CSP addition (**Extended Figure 8AB**), showing  
255 that most replisomes remain intact in competent pneumococcal cells. Next, repeating the  
256 transformation experiment in this strain revealed that the cellular distribution of foci was  
257 almost identical for both fusions (**Figure 4AB**). 83,4 % of DprA-mTurquoise foci colocalised  
258 with YFP-DnaX foci (**Figure 4C**), irrespective of the cell cycle stage of the cell. The replisome  
259 protein DnaX moves dynamically around midcell<sup>48</sup>. Time-lapse microscopy of both DprA-  
260 mTurquoise and YFP-DnaX in competent, transforming cells showed that their midcell foci  
261 exhibited the same dynamics (**Movie 1, Figure 4D**). In all, this demonstrated that early DprA-  
262 mediated transformation HR intermediates navigate with the replisome. To strengthen this  
263 conclusion, CHIP-PCR experiments were carried out to explore whether YFP-DnaX was in close  
264 proximity to tDNA in transforming cells. First, results showed that a heterologous tDNA PCR  
265 fragment was copurified with DprA-GFP and DprA-YFP at 10-fold higher levels than with the  
266 DprA<sup>AR</sup>-GFP dimerization mutant or the unfused GFP used as a negative control (**Figure 4E**).  
267 Second, this tDNA was co-purified with YFP-DnaX at a similar level to DprA-GFP (**Figure 4E**),  
268 suggesting close proximity between early DprA-mediated HR intermediates and chromosomal  
269 replication forks during transformation. We also used a NanoBit assay<sup>49,50</sup> to explore the  
270 proximity of DprA engaged in transformation with the replisome. This system employs a  
271 luciferase separated into a large bit (LgBit) and a small bit (SmBit). Fusion of each part to  
272 different proteins that interact or are in close proximity in cells can restore luciferase activity  
273 and produce light in the presence of a furimazine-based substrate<sup>51</sup>. A strain possessing DprA-  
274 LgBit and an ectopic DprA-SmBit was used as a positive control and competent cells  
275 demonstrated strong luminescence irrespective of tDNA addition, due to dimerization of  
276 DprA (**Figure 4F**). The LgBit tag was fused to the Cter of DprA or DprA<sup>AR</sup> and the SmBit was



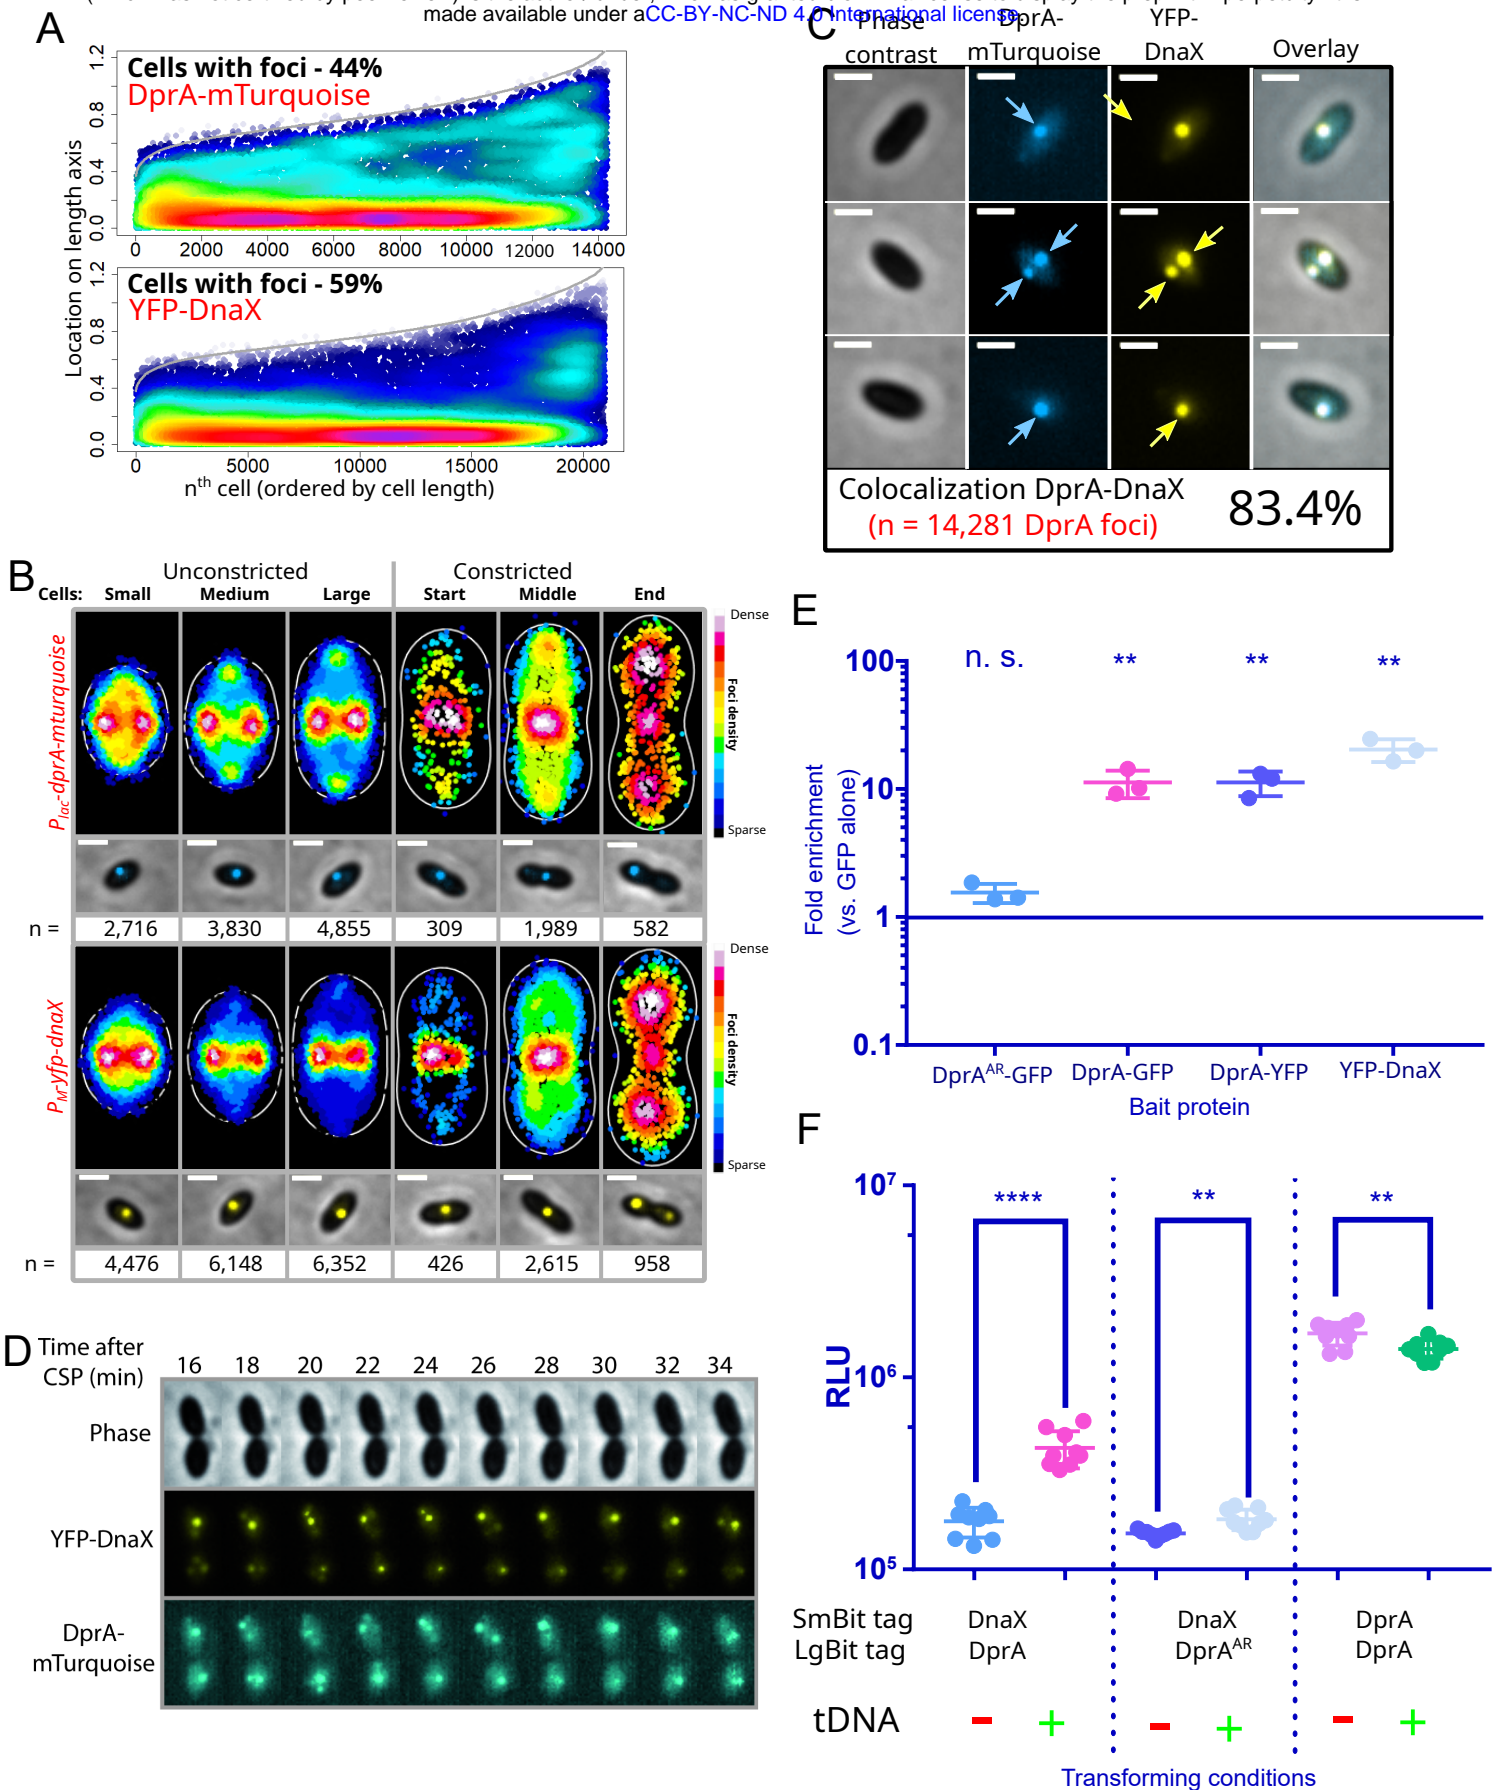

**Figure 4: HR intermediates of transformation interact with active chromosomal replication**

**forks in competent cells.** (A) Low level DprA-mTurquoise foci display a localisation profile similar to a YFP-DnaX fluorescent fusion of the replisome clamp loader expressed in the same R4631 cells (*comCO*, *CEP<sub>M</sub>-yfp-dnaX*, *CEPIIP<sub>lac</sub>-dprA-mTurquoise*, *dprA*). Representations as focus density maps as described in [Figure 1C](#). 29,942 cells analysed possessing 14,281 DprA-mTurquoise foci and 20,975 YFP-DnaX foci analysed. (B) DprA-mTurquoise and YFP-DnaX foci localisation on density heat maps as described in [Figure 2C](#) for R4631 strain. Data used as in *panel A*. Microscopy images represent sample images of each cell category showing preferential focus localisation. Small cells, 9,979 cells, 2,716 DprA-mTurquoise and 4,476 YFP-DnaX foci analysed; medium cells, 8,517 cells, 3,830 DprA-mTurquoise and 6,148 YFP-DnaX foci analysed; large cells, 7,952 cells, 4,855 DprA-mTurquoise and 6,352 YFP-DnaX foci analysed; cons. start cells, 508 cells, 309 DprA-mTurquoise and 426 YFP-DnaX foci analysed; cons. middle cells, 2,390 cells, 1,989 DprA-mTurquoise and 2,615 YFP-DnaX foci analysed; cons. end cells, 596 cells, 582 DprA-mTurquoise and 958 YFP-DnaX foci analysed. (C) Sample microscopy images of R4631 strain expressing low level DprA-mTurquoise and YFP-DnaX and colocalisation of DprA-mTurquoise with YFP-DnaX in these cells. Images taken 15 minutes after competence induction and 5 minutes after DNA addition (250 ng  $\mu\text{L}^{-1}$ ). Scale bars, 1  $\mu\text{m}$ . Phase contrast, phase contrast images of cells; overlay, overlay of all 3 other images. (D) DnaX and DprA produce similarly dynamic foci in competent, transforming cells. DprA-mTurquoise and YFP-DnaX observed during time-lapse microscopy of strain R4631 (*comCO*, *CEP<sub>M</sub>-yfp-dnaX*, *CEPII-P<sub>lac</sub>-dprA-mturquoise*, *dprA::spc*) starting 10 min after competence induction and five min after DNA addition. Images taken every two min. Phase, phase contrast images of cells. Overlay, a merge of the three other images. Scale bars, 1  $\mu\text{m}$ . (E) The replisome clamp loader DnaX interacts with transforming ssDNA in early HR intermediates, as shown by co-purification

of heterologous transforming ssDNA with YFP-DnaX at levels comparable to DprA-GFP and DprA-YFP in CHIP-PCR experiments. In contrast, DprA<sup>AR</sup>-GFP co-purified at levels comparable to the GFP alone negative control (with an enrichment value of 1, to which all other samples were normalised). Strains used, R2546, *comC0*, *CEP<sub>X</sub>-gfp*; R3406, *comC0*, *CEPM-yfp-dnaX*; R3728, *comC0*, *dprA-gfp*; R4046, *comC0*, *dprA<sup>AR</sup>-gfp*; R4404, *comC0*, *dprA-yfp*. Asterisks represent significant difference between samples (\*\* =  $p < 0.005$ , n. s. = not significant). DprA<sup>AR</sup>-GFP,  $p = 0.52$ ; DprA-GFP,  $p = 0.0029$ ; DprA-YFP,  $p = 0.0019$ ; YFP-DnaX,  $p = 0.0012$ . (F) Split-luciferase assay comparing cellular proximity of DnaX and DprA in presence or absence of tDNA. Luminescence signal increases when tDNA is added to competent cells containing *dprA-lgbit* and *dnaX-smbit* (R4856), indicating an increased proximity of these fusion proteins in the presence of tDNA. When *dprA-lgbit* is replaced by the dimerization mutant *dprA<sup>AR</sup>-lgbit* (R4861), the increase in luminescence upon addition of tDNA is attenuated. A strain containing *dprA-lgbit* and *P<sub>lac</sub>-dprA-smbit* (R4858) was used as a positive control for interaction since DprA dimerises, and shows high luminescence irrespective of tDNA addition. Each point represents an individual replicate, with 9 replicates done for each condition. RLU, relative luminescence units. Asterisks represent significant difference between samples (\*\*\*\* =  $p < 0.001$ , \*\* =  $p < 0.01$ , n. s. = not significant). *dnaX-smbit*, *dprA-lgbit*,  $p = 0.00009$ ; *dnaX-smbit*, *dprA<sup>AR</sup>-lgbit*,  $p = 0.009$ ; *CEP<sub>lac</sub>-dprA-smbit*, *dprA-lgbit*,  $p = 0.0066$ .

277 fused to the Cter of DnaX. Addition of tDNA to competent cells increased luminescence in  
278 cells coexpressing DnaX-SmBit and DprA-LgBit but not DnaX-SmBit and DprA<sup>AR</sup>-LgBit (Figure  
279 4F). This result further demonstrated a close proximity between the replisome and DprA,  
280 dependent on tDNA.. Then, to formally demonstrate that RecA is also targeted to  
281 chromosomal replication forks during transformation, we analysed RecA-mTurquoise  
282 localisation in *recA/recA-mturquoise* competent cells co-expressing YFP-DnaX. As expected,  
283 RecA-mTurquoise foci were found to strongly colocalise with YFP-DnaX at midcell in  
284 transforming cells (Figure 5ABC).

285

#### 286 ***RecA forms dynamic tDNA-dependent filaments at chromosomal replication forks.***

287 In experiments investigating localisation of RecA-mTurquoise in the *recA/recA-mturquoise*  
288 strain, we observed filamentous fluorescent structures in a minority of non-competent cells  
289 (8%). These long polymers (0,82  $\mu\text{m}$  +/- 0,28  $\mu\text{m}$ ) appear similar to RecA filaments reported  
290 as HR filaments involved in recombinational repair of double-strand breaks (DSB) in other  
291 bacteria (Badrinarayanan *et al.*, 2015; Amarh *et al.*, 2018; Wiktor *et al.*, 2021). Similarly,,  
292 exposure of non-competent pneumococcal cells to DNA damaging agent norfloxacin  
293 increased the number of cells presenting long, dynamic RecA polymers, averaging 0,84  $\mu\text{m}$   
294 (+/- 0,31  $\mu\text{m}$ ) in length, from 8% to 69.8% (Movies 2 and 3, Extended Figure 9). Notably, in  
295 transforming cells of this strain, we observed that 59 % (+/- 5 %) of RecA-mTurquoise foci  
296 colocalising with replisomes exhibited dynamic filaments emanating from these foci (Figure  
297 5D). We used time-lapse microfluidics to track RecA-mTurquoise and YFP-DnaX localisation in  
298 real time in transforming cells<sup>52</sup>. Results showed rapid formation of RecA-mTurquoise foci in  
299 the vicinity of the replisome as little as 2 minutes after tDNA addition, and subsequent

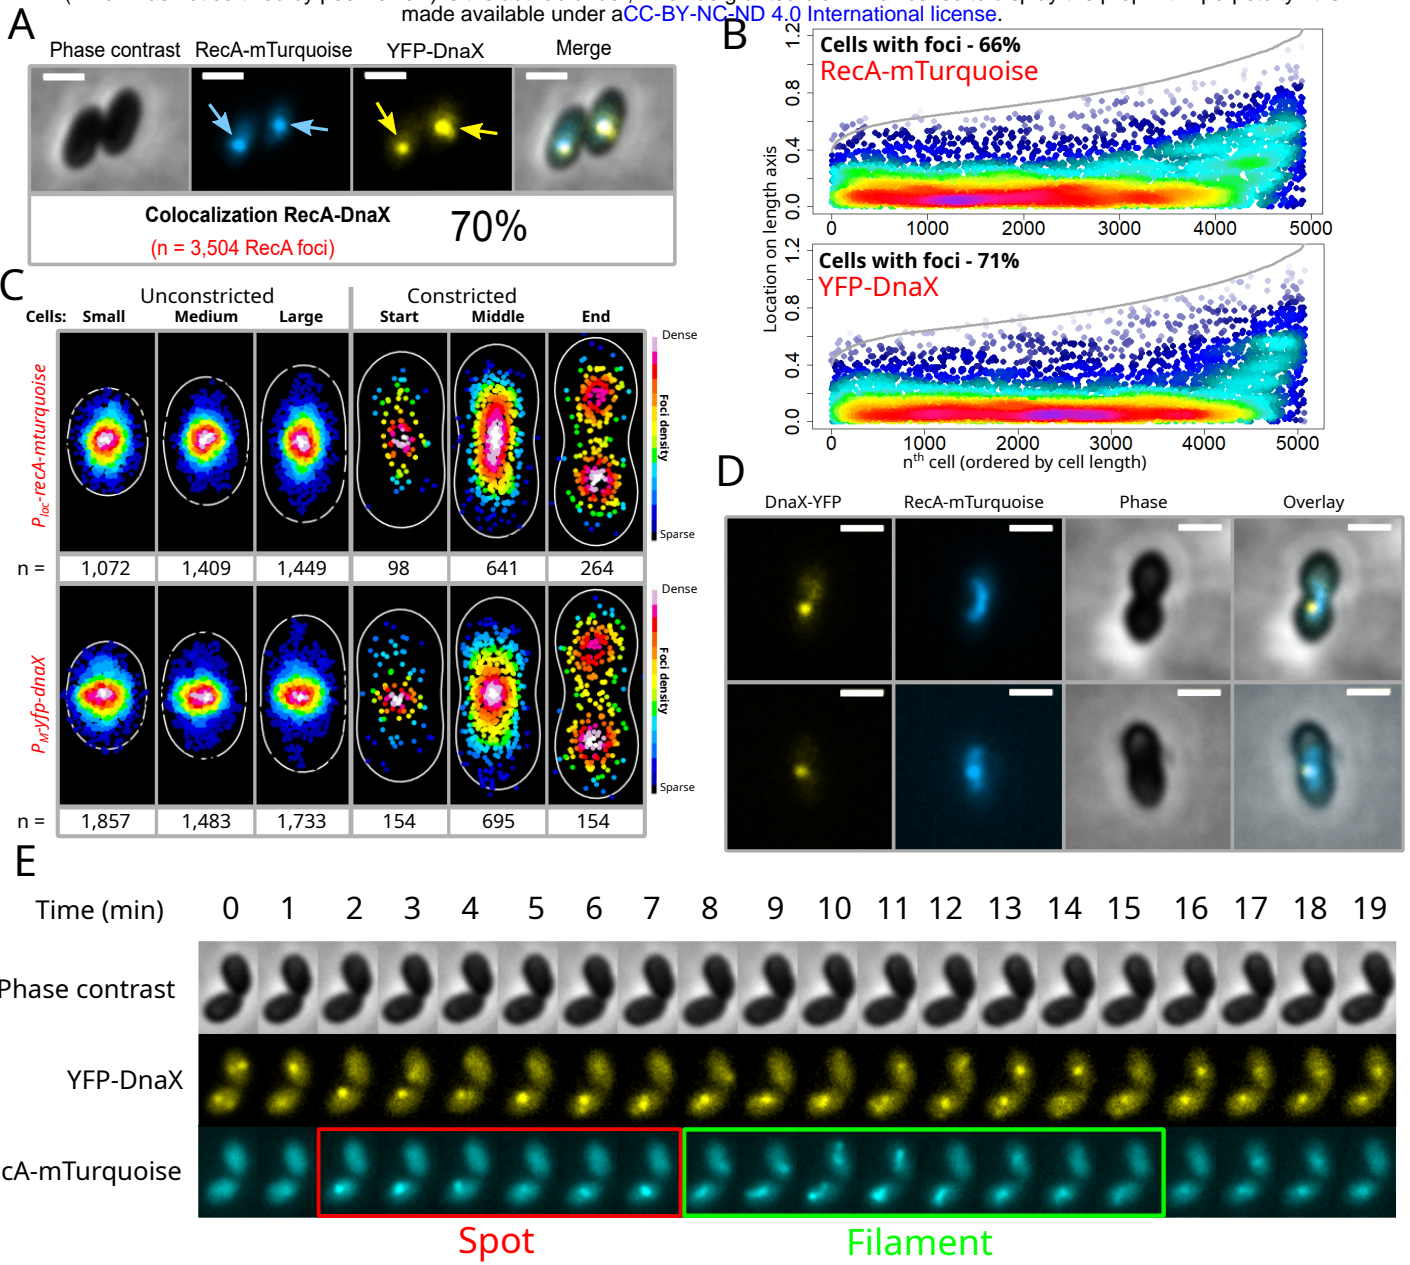

**Figure 5: RecA/RecA-mTurquoise filaments emanate from replication forks for homology search during transformation.** (A) RecA-mTurquoise and YFP-DnaX colocalise in competent cells in the presence of tDNA. Strain used, R4840 (*comC0*, *ssbB::luc*, *CEP<sub>M</sub>-yfp-dnaX*, *CEPII-P<sub>lac</sub>-recA-mturquoise*). 5,866 cells, 4,923 RecA-mTurquoise foci and 5,081 YFP-DnaX foci analysed. (B) Focus density maps of RecA-mTurquoise and YFP-DnaX, as described in [Figure 1C](#). Strain, cell and foci details as in *panel A*. (C) Heatmaps of RecA-mTurquoise and YFP-DnaX as described in [Figure 2C](#). Small cells, 1,730 cells, 1,072 RecA-mTurquoise and 1,071 YFP-DnaX foci analysed; medium cells, 1,766 cells, 1,409 RecA-mTurquoise and 1,582 YFP-DnaX foci analysed; large cells, 1,603 cells, 1,449 RecA-mTurquoise and 1,582 YFP-DnaX foci analysed; cons. start cells, 93 cells, 88 RecA-mTurquoise and 92 YFP-DnaX foci analysed; cons. middle cells, 510 cells, 1,989 RecA-mTurquoise and 614 YFP-DnaX foci analysed; cons. end cells, 165 cells, 264 RecA-mTurquoise and 257 YFP-DnaX foci analysed. (D) Microscopy images showing filaments of RecA-mTurquoise emanating from YFP-DnaX foci. (E) Time-lapse images of RecA-mTurquoise and YFP-DnaX in microfluidics experiment with time representing time after tDNA addition. Strain used as in *panel A*.



300 dynamic extension of filaments (Figure 5E, Movie 4). In contrast to the RecA filaments formed  
301 in cells exposed to norfloxacin, those that emanate from replication forks in transformed cells  
302 were short, extending on average 0.22 (+/- 0.05)  $\mu\text{m}$  either side of a replisome colocalisation  
303 point. Similar short tDNA-dependent RecA filaments were observed with heterologous tDNA  
304 (genomic DNA from *E. coli*) (Extended Figure 8CDE) and, therefore, are not the result of  
305 pairing with a complementary sequence. Thus, these dynamic RecA polymers may represent  
306 presynaptic HR filaments assembled on tDNA and mediating homology search after having  
307 accessed the recipient chromosome *via* the replisome landing pad.

308 Then, to test whether blocking DNA replication altered the capacity of DprA to  
309 mediate tDNA dependent RecA filamentation at chromosomal replication forks, we  
310 reproduced these localisation experiments in the presence of HpUra, a nucleotide analogue  
311 that selectively inhibits the essential PolC DNA polymerase of the pneumococcal  
312 replisome<sup>30,53</sup>. We first analysed RecA-mTurquoise localisation in non-competent *recA/recA-*  
313 *mturquoise* cells following addition of saturating amount of HpUra that fully blocks  
314 chromosomal DNA replication and cell growth<sup>30,54</sup> (Extended Figure 10A). We observed the  
315 formation of long RecA-mTurquoise filaments (0.94  $\mu\text{m}$  +/- 0.41  $\mu\text{m}$ ) 5 minutes after HpUra  
316 addition (Extended Figure 10B), reproducing what was observed previously in *B. subtilis*<sup>55</sup>.  
317 Importantly, these filaments were lost in cells lacking *recO*, showing that they depend on the  
318 RecFOR recombinase loading system<sup>52,53</sup> (Extended Figure 10B). We previously demonstrated  
319 that transformation is RecO independent<sup>56</sup>. Thus, we analysed RecA-mTurquoise and YFP-  
320 DnaX localisations in *recO*, *recA/recAmTurquoise*, *yfp-dnaX* competent cells, to prevent  
321 formation of HpUra-dependent and RecO-mediated RecA-mTurquoise filaments. Cells were  
322 exposed to HpUra for 5 minutes, then CSP was added to induce competence, and tDNA was  
323 added 10 minutes later. Cells were visualised after a further 5 minute incubation to allow

324 tDNA internalisation. Results showed that firstly, YFP-DnaX still accumulated into midcell foci  
325 even after PolC-directed replication was blocked, showing that replisomes remained intact,  
326 although stalled (**Extended Figure 10CDEF**). In transforming cells with stalled replisomes, RecA  
327 still accumulated into midcell foci, which strongly colocalised with DnaX-YFP (**Extended Figure**  
328 **10CDEF**). In conclusion, these results show that active replication is not required for RecA  
329 access to chromosomal forks during transformation and that RecO is not involved in tDNA-  
330 dependent RecA filamentation at that precise chromosomal location.

331

## 332 **Discussion**

333 In this study, we reveal that the dedicated DprA-mediated and RecA-directed HR  
334 pathway of natural genetic transformation is spatiotemporally orchestrated at chromosomal  
335 replication forks in *S. pneumoniae* (**Figure 6A**). First, by using functional GFP fusions, we  
336 demonstrate that both DprA and RecA accumulate at midcell and colocalise with the  
337 replisome protein DnaX in a tDNA-dependent manner. These colocalisations are observed in  
338 ~70 % of a competent, transforming population, roughly equivalent to the number of cells  
339 undergoing chromosomal replication at a given time in these growth conditions (**Figures 4**  
340 **and 5**). Second, we found that DnaX is in physical proximity to tDNA in transforming cells  
341 (**Figure 4E**) and that tDNA addition promotes interaction between DnaX and DprA (**Figure 4F**).  
342 Interdependent DprA and RecA accumulation at chromosomal replication forks following  
343 tDNA internalisation matches the interplay between DprA, RecA and ssDNA previously  
344 uncovered by combining biochemical and genetic analyses, and proven to promote HR during  
345 transformation *via* the formation of the presynaptic HR filament<sup>23,24</sup>. Strong evidence  
346 supporting this conclusion is the formation of tDNA-dependent and DprA-mediated RecA



A

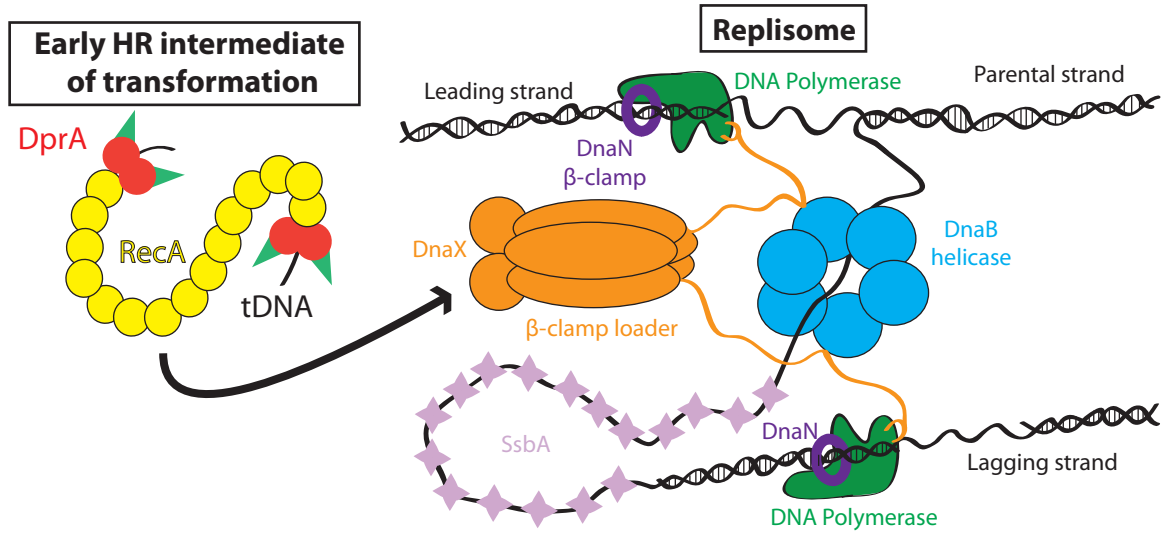

B

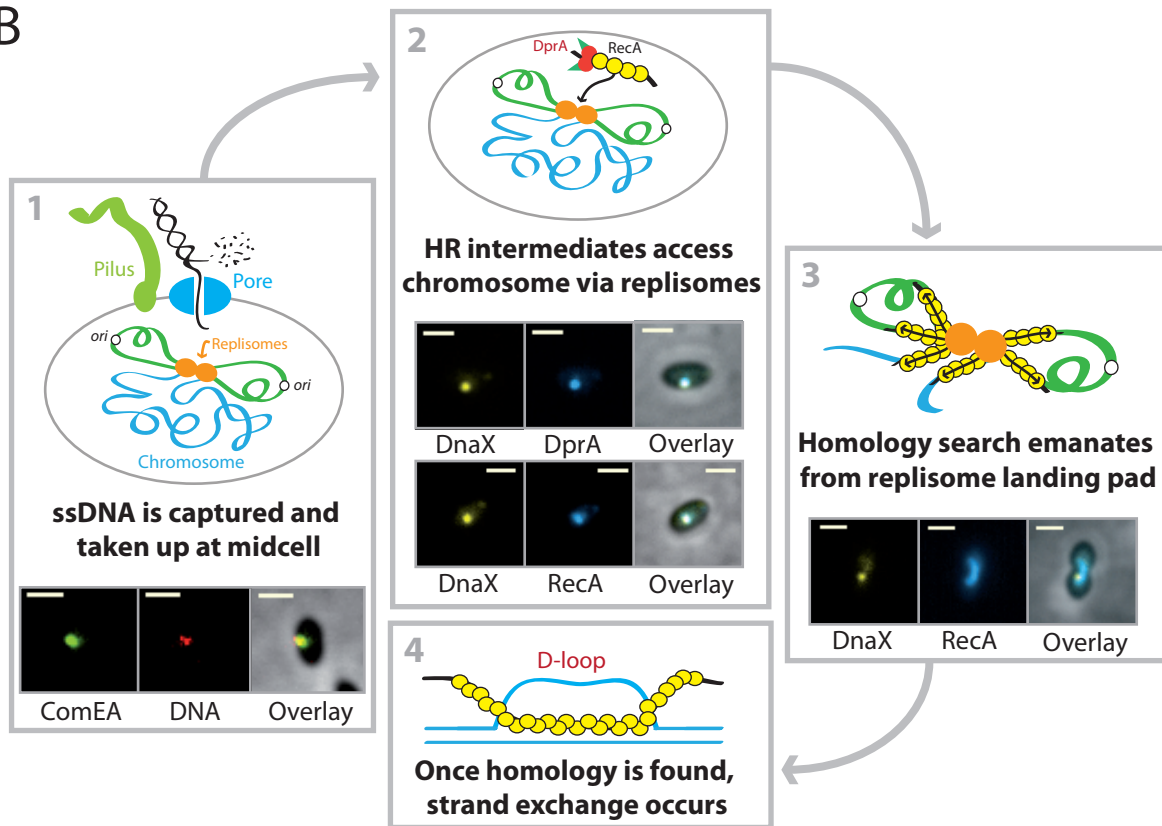

**Figure 6: Model of the interaction between transformation and replication complexes. (A)**

Tight connection between early HR intermediates of transformation, comprising of the transformation-dedicated RMP DprA, the recombinase RecA and transforming ssDNA, and active replisomes during pneumococcal transformation. Diagrammatic representation of the replisome architecture based on bacterial model from *E. coli*, adapted to the pneumococcus.

(B) Model of the interaction between early HR intermediates of transformation and active replisomes, and how this may facilitate homology search during HR. 1 – Transforming ssDNA is captured and internalised at midcell, providing a direct spatial link between incoming transformation nucleocomplexes and active replisomes also localised to midcell. Microscopy images taken from experiments carried out previously demonstrating colocalisation of the DNA receptor ComEA and Cy3-labelled transforming DNA at midcell<sup>37</sup>. Scale bar 1  $\mu\text{m}$ . 2 – Early HR intermediates comprising DprA, RecA and ssDNA access the chromosome via anchoring to active replisomes. Microscopy images display the strong colocalisation of both DprA and RecA with the replisome  $\beta$ -clamp loader DnaX, as shown in this study. Scale bar 1  $\mu\text{m}$ . 3 – RecA mediates homology search within the recipient chromosome, emanating from replisomes used as landing pads to access the chromosome. Microscopy images showing filamentation of RecA emanating from the replisome (shown via DnaX), as shown in this study. 4 – Once homology is found, strand exchange occurs between the transforming ssDNA and the homologous strand of the recipient chromosome, generating a transformation D-loop which will be resolved by replication into one wildtype and one transformed chromosome.

347 filaments emanating from the replisome (Figure 5DE). In addition, midcell DprA-GFP  
348 localisation is not observed in a *comEC* mutant (Extended Figure 2D), demonstrating the need  
349 for tDNA internalisation to generate DprA and RecA foci by interaction with the internalised  
350 ssDNA template. Third, both DprA and RecA foci and RecA filaments are observed in a minute  
351 time frame in transforming cells. These kinetics are as rapid as that of tDNA integration into  
352 the pneumococcal chromosome tracked over time with the use of a short radiolabeled tDNA  
353 fragment homologous to a specific chromosomal locus<sup>30</sup>. Fourth, both DprA and RecA foci  
354 and RecA filaments are formed at replication forks either with homologous or heterologous  
355 tDNA, in the same short time frame (Figure 5 and Extended Figure S8). Thus, we conclude that  
356 the RecA filaments emanating from the replication forks in transforming pneumococcal cells  
357 are presynaptic HR intermediates engaged in the search of homology on the chromosome  
358 (Figure 6B). Altogether, these findings link the HR machinery of transformation and the  
359 replisome for the first time in a naturally transformable bacterial species.

360         Dynamic RecA filaments formed at replication forks in transforming pneumococcal  
361 cells are similar to those of genome maintenance HR pathways visualised in single cells in  
362 several bacterial species, and demonstrated to be presynaptic filaments actively searching for  
363 homology and promoting recombinational DNA repair<sup>44–46</sup>. However, these RecA filaments  
364 exhibit marked differences compared to those of pneumococcal transformation reported  
365 here. Notably, the dynamic RecA filaments assembled at a single double-strand break on one  
366 copy of the neoreplicated chromosome of *Escherichia coli* or *Caulobacter crescentus* extend  
367 across the cell length, which is proposed to correspond to the bidirectional search for the  
368 uncleaved homologous DNA on the second copy of the chromosome segregated to the  
369 opposite cell pole<sup>44–46</sup>. We observed such long RecA filaments in growing pneumococcal cells  
370 suffering genome damages, including specific replication fork arrest caused by the HpUra PolC

371 inhibitor as previously reported in *B. subtilis*<sup>55</sup> (Extended Figure 10). In contrast, RecA  
372 filaments formed during pneumococcal transformation at replication forks are shorter (Figure  
373 5DE). One reason for this difference may be the length of the tDNA entering the cell,  
374 evaluated to be in the range of 3 to 7 kb and gradually reduced over the competence  
375 window<sup>43</sup>. Another marked difference between RecA filaments in HR pathways of  
376 pneumococcal transformation and genome maintenance is their assembly site in the cell. In  
377 the latter case, RecA filaments are formed on the chromosome at the site of DNA damage, in  
378 conjunction with the formation of ssDNA template. In contrast, in the case of pneumococcal  
379 transformation, ssDNA is formed and enters the cell at the cytoplasmic membrane through  
380 ComEC, and must reach the replication fork where DprA-mediated RecA filamentation occurs.  
381 Therefore, ssDNA formation and presynaptic RecA filamentation appear to be spatially  
382 separated during transformation in the pneumococcus. Interestingly, however, tDNA capture  
383 and uptake was previously found to also occur at midcell in the pneumococcus<sup>36,37</sup>. Thus,  
384 transformation appears to proceed via a midcell channel coupling DNA capture and  
385 internalisation with chromosome access and HR, which may underpin the speed at which  
386 transformation occurs in a minute time frame in the pneumococcus<sup>30</sup>.

387 Previous analysis of RecA localization during transformation in *B. subtilis* depicted a  
388 different choreography than the one reported here for *S. pneumoniae*. Interestingly,  
389 transformation occurs in non-replicating *B. subtilis* cells, as proven by the lack of DnaX-GFP  
390 foci in competent cells<sup>57</sup>, and GFP-RecA has been found to localise at one cell pole where the  
391 proteins directing tDNA capture and uptake accumulate<sup>33</sup>. Upon transformation, GFP-RecA  
392 has been found to generate long filaments from the cell pole, proposed to represent  
393 homology search on chromosomal DNA<sup>33</sup>. However, *B. subtilis* DprA was not found to follow  
394 the same choreography as it accumulates at midcell in transforming cells<sup>34</sup>. These marked

395 deviations in RecA filamentation dynamics during transformation between *S. pneumoniae*  
396 and *B. subtilis* run parallel to the difference in the timing of competence development  
397 between these two species. Pneumococcal competence is triggered in actively replicating  
398 cells in response to a large panel of stresses<sup>35</sup>, including genome damage<sup>54,58,59</sup>, and lasts for  
399 a short period of time of 30 minutes<sup>60</sup>. In contrast, competence in *B. subtilis* occurs during  
400 nutrient starvation when cells stop replicating, and lasts for several hours<sup>8</sup>. Thus,  
401 transformable bacterial species have evolved distinct strategies to mediate HR-mediated  
402 chromosomal integration of tDNA, depending on how competence is integrated into their cell  
403 cycle. It will be interesting to explore how other transformable species integrate the early HR  
404 steps of transformation into their varied cell cycles. The anchoring of the presynaptic HR  
405 filaments of transformation to the chromosomal replication forks of *S. pneumoniae* not only  
406 provides them immediate access to chromosomal DNA for homology search, but also to the  
407 potential actions of the large set of proteins acting at the forks, either directly in DNA  
408 replication or occasionally to repair the damaged forks. This toolbox of DNA effectors are  
409 ideally located to assist the whole HR process of transformation up to covalent linkage of  
410 tDNA to the chromosome, many steps of which remain uncharacterised. Of note, we  
411 demonstrate with HpUra-treated competent cells that the replication forks do not need to be  
412 active to act as molecular anchors for the early step of HR of transformation (**Extended Figure**  
413 **10**). This mirrors a previous study showing that HpUra-treated competent pneumococcal cells  
414 integrate tDNA as efficiently as non-treated cells<sup>59</sup>. This indicates that RecA filaments spread  
415 over the genome for homology search, emanating from replication forks.

416 A major perspective of this study is to identify how early HR intermediates, composed  
417 of DprA and RecA bound to tDNA, are driven to the chromosomal replication forks. Many  
418 proteins are concentrated at these vital chromosomal sites, either essential or accessory to

419 the DNA replication process. We show that RecA drives early HR intermediates to midcell  
420 (Figure 2DEF), opening up the possibility of an interaction between RecA and such a  
421 replication protein partner. One of these known accessory effectors is the RecO protein,  
422 which is known to mediate RecA loading on ssDNA gaps. However, we demonstrate RecO is  
423 not needed for replisome access of early HR intermediates or RecA filamentation at  
424 replication forks (Extended Figure 10). In addition, transformation HR effectors SsbB and RadA  
425 also played no role in this chromosome access mechanism (Extended Figure 3).

426 In conclusion, this study revealed that early HR intermediates of pneumococcal  
427 transformation accumulate at chromosomal replication forks. By doing so, replication forks  
428 could provide a landing pad for presynaptic filaments of HR to access the recipient  
429 chromosome and carry out homology search, optimising the speed and efficiency of  
430 transformation.

431

432

433

434

435

436

437

438

439

## 440 **Materials and Methods**

### 441 ***Bacterial strains, competence and transformation***

442 The pneumococcal strains, primers and plasmids used in this study can be found in  
443 **Table S1**. Standard procedures for transformation and growth media were used<sup>61</sup>. In this  
444 study, cells were prevented from spontaneously developing competence by deletion of the  
445 *comC* gene (*comC0*)<sup>62</sup>. Pre-competent cultures were prepared and transformation carried out  
446 as previously described<sup>38</sup>. Antibiotic concentrations ( $\mu\text{g mL}^{-1}$ ) used for the selection of *S.*  
447 *pneumoniae* transformants were: chloramphenicol (Cm), 4.5; erythromycin, 0.05; kanamycin  
448 (Kan), 250; spectinomycin (Spc), 100; streptomycin (Sm), 200; trimethoprim (Trim), 20.  
449 GraphPad Prism was used for statistical analyses. Detailed information regarding the  
450 construction of new plasmids and strains can be found in the **Supplementary Information**. To  
451 compare protein expression profiles, Western blots were carried out as previously  
452 described<sup>38</sup>. Secondary polyclonal antibodies raised against RecA and SsbB were used at  
453 1/10,000 dilution.

454

### 455 ***Fluorescence microscopy and image analysis***

456 To visualise cells by epifluorescence microscopy, pneumococcal precultures grown in C+Y  
457 medium at 37 °C to an OD<sub>550</sub> of 0.1 were induced with CSP (100 ng mL<sup>-1</sup>). Cells were incubated  
458 for 10 minutes at 37°C before addition of transforming DNA. Transforming DNA we either  
459 homologous (*S. pneumoniae* R1501 genomic DNA) or heterologous (*Escherichia coli* genomic  
460 DNA) prepared using QIAGEN 500/g Genomic tips. Cells were then incubated at 37 °C for 5  
461 minutes unless stated. After this incubation, 2  $\mu\text{L}$  samples were spotted onto a warmed  
462 microscope slide containing a slab of 1.2 % C+Y agarose as previously described<sup>37</sup> before

463 imaging. To generate movies, images were taken of the same fields of vision at varying time  
464 points during incubation at 37 °C. Phase contrast and fluorescence microscopy was performed  
465 as previously described<sup>63</sup>. Images were processed using the Nis-Elements AR software  
466 (Nikon). Images were analysed using MicrobeJ, a plug-in of ImageJ<sup>64</sup>. Data was analysed in R  
467 and represented in two distinct ways. Firstly, focus density maps were plotted on the  
468 longitudinal axis of half cells ordered by cell length. Each spot represents the localisation of  
469 an individual focus, and spot colour represents focus density at a specific location on the half  
470 cell. Only cells with > 0 foci shown. In cells possessing > 1 foci, foci were represented  
471 adjacently on cells of the same length. Secondly, cells were separated into six categories  
472 based on cell size and presence or absence of constriction, and heatmaps were generated for  
473 each category. The six cell categories were defined in MicrobeJ to reflect those determined  
474 previously for pneumococci<sup>63</sup>. End of constriction (cons. end); septum = 1, circularity < 0.7;  
475 middle of constriction (cons. middle), septum = 1, 0.8 > circularity > 0.7; start of constriction  
476 (cons. start), all other cells with septum = 1; Large cells, septum = 0, cell length > 1.4 µm,  
477 circularity < 0.9; medium cells, septum = 0, 1.4 µm > cell length > 1.2 µm, 0.94 > circularity <  
478 0.9; small cells, all other cells with septum = 0. The proportions of cells found in each category  
479 were consistent with those previously observed in these conditions<sup>63</sup>, validating the  
480 parameters used to define the categories.

481

#### 482 ***Chromatin immunoprecipitation PCR (ChIP-PCR)***

483 Chromatin immunoprecipitation (ChIP) was done using magnetic GFP-Trap beads as  
484 per manufacturer's instructions (Chromotek). Briefly, cells were inoculated 1/50 in 30 mL of  
485 C+Y medium pH 7 and grown to OD<sub>550</sub> 0.1. Competence was induced by addition of 100 ng



486 mL<sup>-1</sup> CSP, and cells were incubated for 10 min at 37 °C. Transforming DNA (1 kb capsule  
487 fragment absent from recipient strains amplified from D39 using primer pair DDL35-DDL36)  
488 was added at a final concentration of 1 ng μL<sup>-1</sup> and cells were incubated at 37 °C for 5 minutes  
489 to allow internalisation. Cells were then fixed by addition of 3 mL Fixation solution F (50 mM  
490 Tris pH 8.0, 100 mM NaCl, 0.5 mM EGTA, 1 mM EDTA, 10 % formaldehyde) and incubation for  
491 30 min at room temperature. Cultures were then centrifuged for 10 min at 5,000 g, 4 °C and  
492 supernatants were discarded. Pellets were washed twice in 30 mL cold PBS with  
493 centrifugation at 5,000 g, 4 °C for 10 min in between. Cells were then washed in 1 mL cold  
494 PBS and centrifuged at 10,000 g, 4 °C for 2 min before being frozen with liquid nitrogen and  
495 storage at -80 °C until use. Pellets were defrosted and resuspended in 2 mL cold Lysis L buffer  
496 (50 mM Hepes-KOH pH 7.55, 140 mM NaCl, 1 mM EDTA, 1 % triton X-100, 0.1 % Sodium  
497 deoxycholate, 100 μg mL<sup>-1</sup> RNase A) before sonication in a Diagenode Bioruptor Plus  
498 sonication bath (29 cycles, 30 s sonication, 30 s rest). Resulting samples were centrifuged for  
499 5 min at 16,000 g, 4 °C and supernatants were transferred into fresh 2 mL tubes and  
500 centrifuged for 5 min at 16,000 g, 4 °C. After transfer into fresh 2 mL tubes, 200 μL of each  
501 sample was taken and stored at -80 °C to act as a whole cell extract prior to  
502 immunoprecipitation. 25 μL of GFP-TRAP magnetic beads was then added to each sample,  
503 which was subsequently tumbled gently at 4°C for 3h 30 min. Magnetic beads were recovered  
504 by magnetism, supernatants were discarded and beads were resuspended in 1 mL cold Lysis  
505 L buffer before being centrifuged at 800 g for 5 min. Magnetic beads were recovered by  
506 magnetism, supernatants were discarded and beads were resuspended in 1 mL cold Lysis L5  
507 buffer (50 mM Hepes-KOH pH 7.55, 500 mM NaCl, 1 mM EDTA, 1 % triton X-100, 0.1 % Sodium  
508 deoxycholate, 100 μg mL<sup>-1</sup> RNase A). Magnetic beads were recovered by magnetism,  
509 supernatants were discarded and beads were resuspended in 1 mL cold Wash buffer W (10

510 mM Tris/HCL pH 8.0, 250 mM LiCl, 1 mM EDTA, 0.5 % NP-40, 0.5 % DOC) and beads were then  
511 recovered by magnetism and resuspended in 520  $\mu$ L TES buffer (50 mM Tris/HCl pH 8.0, 10  
512 mM EDTA, 1 % SDS). At this stage, the WCE samples were defrosted and supplemented with  
513 300  $\mu$ L TES buffer and 20  $\mu$ L SDS 10 %. All samples were then incubated at 65 °C with vigorous  
514 shaking overnight. Magnetic beads were removed by magnetism and 12.5  $\mu$ L proteinase K (20  
515 mg mL<sup>-1</sup>) was added before incubation of the samples at 37 °C for 2 h. DNA was purified from  
516 the samples by sequential phenol:chloroform extraction and 1  $\mu$ L glycogen, 40  $\mu$ L sodium  
517 acetate 3M pH 5.3 and 1 mL ethanol was added before incubation at -20 °C to precipitate the  
518 DNA. Samples were then centrifuged at 16,000 g, 4 °C for 15 min and the supernatant was  
519 carefully removed before the pellets were resuspended in 100  $\mu$ L TE buffer pH 8 and  
520 incubated at 65 °C for 20 min. DNA was then purified using GFX PCR purification columns (GE  
521 Healthcare). DNA samples were diluted (1/200 for WCE, 1/20 for IP samples) and probed in  
522 triplicate by qPCR for the presence of the 1 kb capsule fragment using iTaq DNA polymerase  
523 (BIO-RAD) and primer pair DDL34-DDL35, which amplify a 115 bp region within the 1 kb  
524 fragment. Specific amplifications were confirmed by single peaks in melting curve analysis.  
525 Cycle threshold (CT) values were obtained according to the software instructions. Relative  
526 quantification was performed with the  $2^{-\Delta\Delta CT}$  method<sup>65</sup>. Each PCR reaction, run in duplicate  
527 for each sample, was repeated for at least two independent times. Data are represented as  
528 mean  $\pm$  s.e.m calculated from triplicate repeats, with individual data points plotted.

529

### 530 ***Split-luciferase assay***

531 Split luciferase assays were carried out as previously described<sup>49,50</sup>, with modifications.  
532 Briefly, pneumococcal cells were grown in C+Y medium (with 50  $\mu$ M IPTG where required) at  
533 37 °C until OD<sub>550</sub> 0.1 and competence was induced by addition of 100 ng mL<sup>-1</sup> CSP. Cells were

534 then incubated for 10 min at 37 °C before addition of R1501 chromosomal DNA (250 ng  $\mu\text{L}^{-1}$ )  
535 where noted, followed by a further 5 min incubation at 37 °C. Cells were then washed in fresh  
536 C+Y medium and 1 % NanoGlo substrate (Promega) was added and luminescence was  
537 measured 20 times every 1 min in a plate reader (VarioSkan luminometer, ThermoFisher).  
538 Data are represented as mean  $\pm$  s.e.m calculated from nine independent repeats, with  
539 individual data points plotted.

540

541

542

543

544

545

546

547

548

549

550

551

552

553

554

555

556

557

558

## 559 **Acknowledgements**

560 We thank Isabelle Mortier-Barriere for support with microfluidics experiments. We thank  
561 Jérôme Rech for support with microscopy and video assembly. We thank the LITC imaging  
562 platform of Toulouse TRI for their assistance in microscopy. This work was funded by the  
563 Centre National de la Recherche Scientifique, University Paul Sabatier and the Agence  
564 Nationale de la Recherche (grants ANR-10-BLAN-1331 and ANR-17-CE13-0031).

565

## 566 **Author contributions**

567 C. J. and P. P. wrote the paper. C. J., R. H., A-L. S., M. D. and D. D. L. performed the experiments.

568 C. J. and P. P. designed and analysed the experiments and interpreted the data.

## 569 **References**

570 1. Michel, B. & Leach, D. Homologous Recombination-Enzymes and Pathways. *EcoSal*  
571 *Plus* **5**, (2012).

572 2. Heyer, W.-D., Ehmsen, K. T. & Liu, J. Regulation of homologous recombination in  
573 eukaryotes. *Annu Rev Genet* **44**, 113–139 (2010).

574 3. Krejci, L., Altmannova, V., Spirek, M. & Zhao, X. Homologous recombination and its  
575 regulation. *Nucleic Acids Res* **40**, 5795–5818 (2012).

576 4. Lusetti, S. L. & Cox, M. M. The bacterial RecA protein and the recombinational DNA  
577 repair of stalled replication forks. *Annu Rev Biochem* **71**, 71–100 (2002).

578 5. Bell, J. C. & Kowalczykowski, S. C. RecA: Regulation and Mechanism of a Molecular  
579 Search Engine. *Trends Biochem Sci* **41**, 491–507 (2016).

580 6. Heyer, W.-D. Regulation of recombination and genomic maintenance. *Cold Spring Harb*  
581 *Perspect Biol* **7**, a016501 (2015).

- 582 7. Hunter, N. Meiotic Recombination: The Essence of Heredity. *Cold Spring Harb Perspect*  
583 *Biol* **7**, a016618 (2015).
- 584 8. Johnston, C., Martin, B., Fichant, G., Polard, P. & Claverys, J.-P. Bacterial  
585 transformation: distribution, shared mechanisms and divergent control. *Nat. Rev.*  
586 *Microbiol.* **12**, 181–196 (2014).
- 587 9. Blokesch, M. Natural competence for transformation. *Current Biology* **26**, R1126–R1130  
588 (2016).
- 589 10. Brueggemann, A. B., Pai, R., Crook, D. W. & Beall, B. Vaccine escape recombinants  
590 emerge after pneumococcal vaccination in the United States. *PLoS Pathog* **3**, e168  
591 (2007).
- 592 11. Croucher, N. J. *et al.* Horizontal DNA Transfer Mechanisms of Bacteria as Weapons of  
593 Intragenomic Conflict. *PLoS Biol* **14**, e1002394 (2016).
- 594 12. Carvalho, G. *et al.* Bacterial Transformation Buffers Environmental Fluctuations through  
595 the Reversible Integration of Mobile Genetic Elements. *mBio* **11**, e02443-19.
- 596 13. Ambur, O. H., Engelstädter, J., Johnsen, P. J., Miller, E. L. & Rozen, D. E. Steady at the  
597 wheel: conservative sex and the benefits of bacterial transformation. *Philos Trans R Soc*  
598 *Lond B Biol Sci* **371**, 20150528 (2016).
- 599 14. Apagyi, K. J., Fraser, C. & Croucher, N. J. Transformation Asymmetry and the Evolution  
600 of the Bacterial Accessory Genome. *Mol Biol Evol* **35**, 575–581 (2018).
- 601 15. Laurenceau, R. *et al.* A type IV pilus mediates DNA binding during natural transformation  
602 in *Streptococcus pneumoniae*. *PLoS Pathog.* **9**, e1003473 (2013).
- 603 16. Seitz, P. *et al.* ComEA is essential for the transfer of external DNA into the periplasm in  
604 naturally transformable *Vibrio cholerae* cells. *PLoS Genet* **10**, e1004066 (2014).
- 605 17. Chen, I., Provvedi, R. & Dubnau, D. A macromolecular complex formed by a pilin-like  
606 protein in competent *Bacillus subtilis*. *J Biol Chem* **281**, 21720–21727 (2006).
- 607 18. Ellison, C. K. *et al.* Retraction of DNA-bound type IV competence pili initiates DNA  
608 uptake during natural transformation in *Vibrio cholerae*. *Nat Microbiol* **3**, 773–780 (2018).

- 609 19. Hahn, J., DeSantis, M. & Dubnau, D. Mechanisms of Transforming DNA Uptake to the  
610 Periplasm of *Bacillus subtilis*. *mBio* **12**, e0106121 (2021).
- 611 20. Puyet, A., Greenberg, B. & Lacks, S. A. Genetic and structural characterization of endA.  
612 A membrane-bound nuclease required for transformation of *Streptococcus pneumoniae*.  
613 *J Mol Biol* **213**, 727–738 (1990).
- 614 21. Inamine, G. S. & Dubnau, D. ComEA, a *Bacillus subtilis* integral membrane protein  
615 required for genetic transformation, is needed for both DNA binding and transport. *J*  
616 *Bacteriol* **177**, 3045–3051 (1995).
- 617 22. Damke, P. P. *et al.* Identification of the periplasmic DNA receptor for natural  
618 transformation of *Helicobacter pylori*. *Nature Communications* **10**, 5357 (2019).
- 619 23. Mortier-Barrière, I. *et al.* A key presynaptic role in transformation for a widespread  
620 bacterial protein: DprA conveys incoming ssDNA to RecA. *Cell* **130**, 824–836 (2007).
- 621 24. Quevillon-Cheruel, S. *et al.* Structure-function analysis of pneumococcal DprA protein  
622 reveals that dimerization is crucial for loading RecA recombinase onto DNA during  
623 transformation. *Proc. Natl. Acad. Sci. U.S.A.* **109**, E2466-2475 (2012).
- 624 25. Yadav, T. *et al.* *Bacillus subtilis* DprA recruits RecA onto single-stranded DNA and  
625 mediates annealing of complementary strands coated by SsbB and SsbA. *J. Biol. Chem.*  
626 **288**, 22437–22450 (2013).
- 627 26. Marie, L. *et al.* Bacterial RadA is a DnaB-type helicase interacting with RecA to promote  
628 bidirectional D-loop extension. *Nat Commun* **8**, 15638 (2017).
- 629 27. Torres, R., Serrano, E. & Alonso, J. C. *Bacillus subtilis* RecA interacts with and loads  
630 RadA/Sms to unwind recombination intermediates during natural chromosomal  
631 transformation. *Nucleic Acids Res* **47**, 9198–9215 (2019).
- 632 28. Nero, T. M. *et al.* ComM is a hexameric helicase that promotes branch migration during  
633 natural transformation in diverse Gram-negative species. *Nucleic Acids Res* **46**, 6099–  
634 6111 (2018).
- 635 29. Dubnau, D. & Blokesch, M. Mechanisms of DNA Uptake by Naturally Competent  
636 Bacteria. *Annu Rev Genet* **53**, 217–237 (2019).

- 637 30. Bergé, M., Mortier-Barrière, I., Martin, B. & Claverys, J.-P. Transformation of  
638 *Streptococcus pneumoniae* relies on DprA- and RecA-dependent protection of incoming  
639 DNA single strands. *Mol. Microbiol.* **50**, 527–536 (2003).
- 640 31. Dalia, A. B. & Dalia, T. N. Spatiotemporal Analysis of DNA Integration during Natural  
641 Transformation Reveals a Mode of Nongenetic Inheritance in Bacteria. *Cell* **179**, 1499-  
642 1511.e10 (2019).
- 643 32. Hahn, J., Maier, B., Haijema, B. J., Sheetz, M. & Dubnau, D. Transformation proteins  
644 and DNA uptake localize to the cell poles in *Bacillus subtilis*. *Cell* **122**, 59–71 (2005).
- 645 33. Kidane, D. & Graumann, P. L. Intracellular protein and DNA dynamics in competent  
646 *Bacillus subtilis* cells. *Cell* **122**, 73–84 (2005).
- 647 34. Tadesse, S. & Graumann, P. L. DprA/Smf protein localizes at the DNA uptake machinery  
648 in competent *Bacillus subtilis* cells. *BMC Microbiol* **7**, 105 (2007).
- 649 35. Claverys, J.-P., Prudhomme, M. & Martin, B. Induction of competence regulons as a  
650 general response to stress in gram-positive bacteria. *Annu. Rev. Microbiol.* **60**, 451–475  
651 (2006).
- 652 36. Lam, T. *et al.* Competence pili in *Streptococcus pneumoniae* are highly dynamic  
653 structures that retract to promote DNA uptake. *Mol Microbiol* **116**, 381–396 (2021).
- 654 37. Bergé, M. J. *et al.* Midcell recruitment of the DNA uptake and virulence nuclease, EndA,  
655 for pneumococcal transformation. *PLoS Pathog.* **9**, e1003596 (2013).
- 656 38. Johnston, C. H. *et al.* The alternative sigma factor  $\sigma_X$  mediates competence shut-off at  
657 the cell pole in *Streptococcus pneumoniae*. *Elife* **9**, (2020).
- 658 39. Johnston, C., Mortier-Barrière, I., Khemici, V. & Polard, P. Fine-tuning cellular levels of  
659 DprA ensures transformant fitness in the human pathogen *Streptococcus pneumoniae*.  
660 *Mol. Microbiol.* **109**, 663–675 (2018).
- 661 40. Pestova, E. V., Håvarstein, L. S. & Morrison, D. A. Regulation of competence for genetic  
662 transformation in *Streptococcus pneumoniae* by an auto-induced peptide pheromone  
663 and a two-component regulatory system. *Mol Microbiol* **21**, 853–862 (1996).

- 664 41. Draskovic, I. & Dubnau, D. Biogenesis of a putative channel protein, ComEC, required  
665 for DNA uptake: membrane topology, oligomerization and formation of disulphide bonds.  
666 *Mol Microbiol* **55**, 881–896 (2005).
- 667 42. Morrison, D. A., Mortier-Barrière, I., Attaiech, L. & Claverys, J.-P. Identification of the  
668 major protein component of the pneumococcal eclipse complex. *J. Bacteriol.* **189**, 6497–  
669 6500 (2007).
- 670 43. Attaiech, L. *et al.* Role of the single-stranded DNA-binding protein SsbB in  
671 pneumococcal transformation: maintenance of a reservoir for genetic plasticity. *PLoS*  
672 *Genet.* **7**, e1002156 (2011).
- 673 44. Badrinarayanan, A., Le, T. B. K. & Laub, M. T. Rapid pairing and re-segregation of distant  
674 homologous loci enables double-strand break repair in bacteria. *J Cell Biol* **210**, 385–  
675 400 (2015).
- 676 45. Amarrh, V., White, M. A. & Leach, D. R. F. Dynamics of RecA-mediated repair of  
677 replication-dependent DNA breaks. *J Cell Biol* **217**, 2299–2307 (2018).
- 678 46. Wiktor, J. *et al.* RecA finds homologous DNA by reduced dimensionality search. *Nature*  
679 **597**, 426–429 (2021).
- 680 47. Boonstra, M., Vesel, N. & Kuipers, O. P. Fluorescently Labeled DNA Interacts with  
681 Competence and Recombination Proteins and Is Integrated and Expressed Following  
682 Natural Transformation of *Bacillus subtilis*. *mBio* **9**, (2018).
- 683 48. van Raaphorst, R., Kjos, M. & Veening, J.-W. Chromosome segregation drives division  
684 site selection in *Streptococcus pneumoniae*. *Proc. Natl. Acad. Sci. U.S.A.* **114**, E5959–  
685 E5968 (2017).
- 686 49. Oliveira Paiva, A. M. *et al.* The Bacterial Chromatin Protein HupA Can Remodel DNA  
687 and Associates with the Nucleoid in *Clostridium difficile*. *J Mol Biol* **431**, 653–672 (2019).
- 688 50. Gallay, C. *et al.* Spatio-temporal control of DNA replication by the pneumococcal cell  
689 cycle regulator CcrZ. *bioRxiv* 775536 (2019) doi:10.1101/775536.
- 690 51. Dixon, A. S. *et al.* NanoLuc Complementation Reporter Optimized for Accurate  
691 Measurement of Protein Interactions in Cells. *ACS Chem Biol* **11**, 400–408 (2016).



- 692 52. Mortier-Barrière, I., Polard, P. & Campo, N. Direct Visualization of Horizontal Gene  
693 Transfer by Transformation in Live Pneumococcal Cells Using Microfluidics. *Genes*  
694 (*Basel*) **11**, E675 (2020).
- 695 53. Brown, N. C. 6-(p-hydroxyphenylazo)-uracil: a selective inhibitor of host DNA replication  
696 in phage-infected *Bacillus subtilis*. *Proc Natl Acad Sci U S A* **67**, 1454–1461 (1970).
- 697 54. Khemici, V., Prudhomme, M. & Polard, P. Tight Interplay between Replication Stress  
698 and Competence Induction in *Streptococcus pneumoniae*. *Cells* **10**, 1938 (2021).
- 699 55. Wang, J. D., Sanders, G. M. & Grossman, A. D. Nutritional control of elongation of DNA  
700 replication by (p)ppGpp. *Cell* **128**, 865–875 (2007).
- 701 56. Johnston, C. *et al.* RecFOR is not required for pneumococcal transformation but  
702 together with XerS for resolution of chromosome dimers frequently formed in the  
703 process. *PLoS Genet.* **11**, e1004934 (2015).
- 704 57. Hahn, J., Tanner, A. W., Carabetta, V. J., Cristea, I. M. & Dubnau, D. ComGA-RelA  
705 interaction and persistence in the *Bacillus subtilis* K-state. *Mol Microbiol* **97**, 454–471  
706 (2015).
- 707 58. Prudhomme, M., Attaiech, L., Sanchez, G., Martin, B. & Claverys, J.-P. Antibiotic stress  
708 induces genetic transformability in the human pathogen *Streptococcus pneumoniae*.  
709 *Science* **313**, 89–92 (2006).
- 710 59. Slager, J., Kjos, M., Attaiech, L. & Veening, J.-W. Antibiotic-induced replication stress  
711 triggers bacterial competence by increasing gene dosage near the origin. *Cell* **157**, 395–  
712 406 (2014).
- 713 60. Johnston, C., Campo, N., Bergé, M. J., Polard, P. & Claverys, J.-P. *Streptococcus*  
714 *pneumoniae*, le transformiste. *Trends Microbiol.* **22**, 113–119 (2014).
- 715 61. Martin, B., Prudhomme, M., Alloing, G., Granadel, C. & Claverys, J. P. Cross-regulation  
716 of competence pheromone production and export in the early control of transformation in  
717 *Streptococcus pneumoniae*. *Mol. Microbiol.* **38**, 867–878 (2000).

- 718 62. Dagkessamanskaia, A. *et al.* Interconnection of competence, stress and CiaR regulons  
719 in *Streptococcus pneumoniae*: competence triggers stationary phase autolysis of ciaR  
720 mutant cells. *Mol. Microbiol.* **51**, 1071–1086 (2004).
- 721 63. Bergé, M. J. *et al.* A programmed cell division delay preserves genome integrity during  
722 natural genetic transformation in *Streptococcus pneumoniae*. *Nat Commun* **8**, 1621  
723 (2017).
- 724 64. Ducret, A., Quardokus, E. M. & Brun, Y. V. MicrobeJ, a tool for high throughput bacterial  
725 cell detection and quantitative analysis. *Nat Microbiol* **1**, 16077 (2016).
- 726 65. Livak, K. J. & Schmittgen, T. D. Analysis of relative gene expression data using real-time  
727 quantitative PCR and the 2<sup>(-Delta Delta C(T))</sup> Method. *Methods* **25**, 402–408 (2001).
- 728 66. Johnston, C. H. *et al.* The alternative sigma factor  $\sigma_X$  mediates competence shut-off at  
729 the cell pole in *Streptococcus pneumoniae*. *Elife* **9**, (2020).
- 730 67. Mortier-Barrière, I., Campo, N., Bergé, M. A., Prudhomme, M. & Polard, P. Natural  
731 Genetic Transformation: A Direct Route to Easy Insertion of Chimeric Genes into the  
732 Pneumococcal Chromosome. *Methods Mol Biol* **1968**, 63–78 (2019).
- 733 68. Martin, B. *et al.* Expression and maintenance of ComD-ComE, the two-component  
734 signal-transduction system that controls competence of *Streptococcus pneumoniae*. *Mol.*  
735 *Microbiol.* **75**, 1513–1528 (2010).
- 736 69. Guiral, S. *et al.* Construction and evaluation of a chromosomal expression platform  
737 (CEP) for ectopic, maltose-driven gene expression in *Streptococcus pneumoniae*.  
738 *Microbiology (Reading, Engl.)* **152**, 343–349 (2006).
- 739 70. Mirouze, N. *et al.* Direct involvement of DprA, the transformation-dedicated RecA loader,  
740 in the shut-off of pneumococcal competence. *Proc. Natl. Acad. Sci. U.S.A.* **110**, E1035-  
741 1044 (2013).
- 742 71. Martin, B., García, P., Castanié, M. P. & Claverys, J. P. The recA gene of *Streptococcus*  
743 *pneumoniae* is part of a competence-induced operon and controls lysogenic induction.  
744 *Mol. Microbiol.* **15**, 367–379 (1995).

- 745 72. Mortier-Barrière, I., Campo, N., Bergé, M. A., Prudhomme, M. & Polard, P. Natural  
746 Genetic Transformation: A Direct Route to Easy Insertion of Chimeric Genes into the  
747 Pneumococcal Chromosome. *Methods Mol Biol* **1968**, 63–78 (2019).
- 748 73. Sung, C. K., Li, H., Claverys, J. P. & Morrison, D. A. An rpsL cassette, janus, for gene  
749 replacement through negative selection in *Streptococcus pneumoniae*. *Appl Environ*  
750 *Microbiol* **67**, 5190–5196 (2001).
- 751 74. Martin, B., García, P., Castanié, M. P. & Claverys, J. P. The recA gene of *Streptococcus*  
752 *pneumoniae* is part of a competence-induced operon and controls lysogenic induction.  
753 *Mol. Microbiol.* **15**, 367–379 (1995).
- 754 75. Mortier-Barrière, I., de Saizieu, A., Claverys, J. P. & Martin, B. Competence-specific  
755 induction of recA is required for full recombination proficiency during transformation in  
756 *Streptococcus pneumoniae*. *Mol. Microbiol.* **27**, 159–170 (1998).
- 757 76. Martin, B., Prats, H. & Claverys, J. P. Cloning of the hexA mismatch-repair gene of  
758 *Streptococcus pneumoniae* and identification of the product. *Gene* **34**, 293–303 (1985).
- 759 77. Caymaris, S. *et al.* The global nutritional regulator CodY is an essential protein in the  
760 human pathogen *Streptococcus pneumoniae*. *Mol. Microbiol.* **78**, 344–360 (2010).
- 761 78. Johnston, C., Martin, B., Granadel, C., Polard, P. & Claverys, J.-P. Programmed  
762 protection of foreign DNA from restriction allows pathogenicity island exchange during  
763 pneumococcal transformation. *PLoS Pathog* **9**, e1003178 (2013).
- 764 79. Martin, B. *et al.* Expression and maintenance of ComD-ComE, the two-component  
765 signal-transduction system that controls competence of *Streptococcus pneumoniae*. *Mol.*  
766 *Microbiol.* **75**, 1513–1528 (2010).
- 767 80. Akerley, B. J. *et al.* Systematic identification of essential genes by in vitro mariner  
768 mutagenesis. *Proc Natl Acad Sci U S A* **95**, 8927–8932 (1998).
- 769 81. Mirouze, N. *et al.* Direct involvement of DprA, the transformation-dedicated RecA loader,  
770 in the shut-off of pneumococcal competence. *Proc. Natl. Acad. Sci. U.S.A.* **110**, E1035-  
771 1044 (2013).

772 82. Bergé, M., Moscoso, M., Prudhomme, M., Martin, B. & Claverys, J.-P. Uptake of  
773 transforming DNA in Gram-positive bacteria: a view from *Streptococcus pneumoniae*.  
774 *Mol. Microbiol.* **45**, 411–421 (2002).

775

776

777

778

779

780

781

782

783

784

785

786

787

788

789

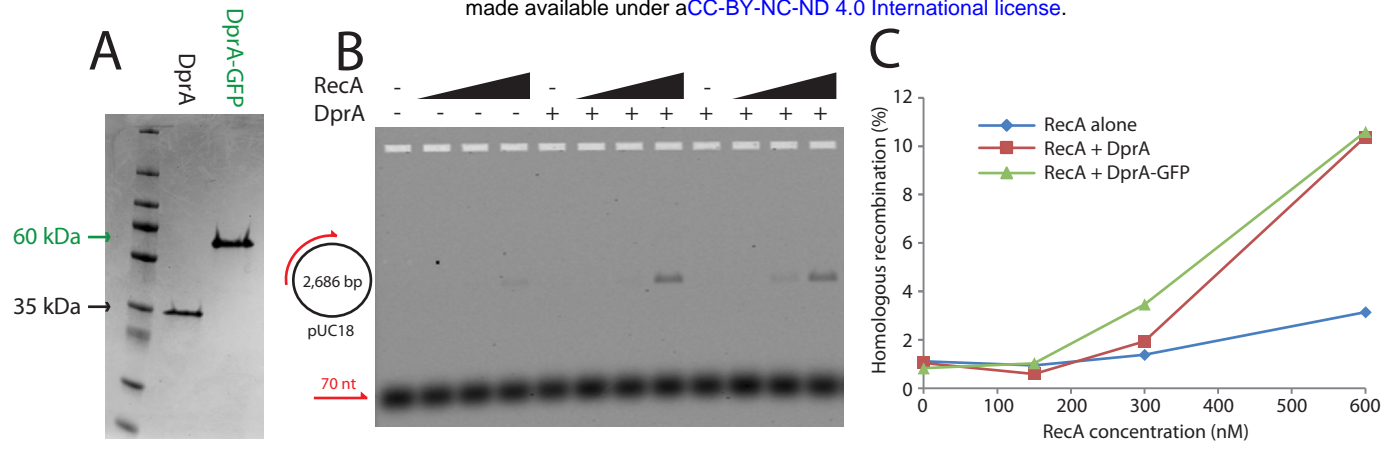

Extended Figure 1

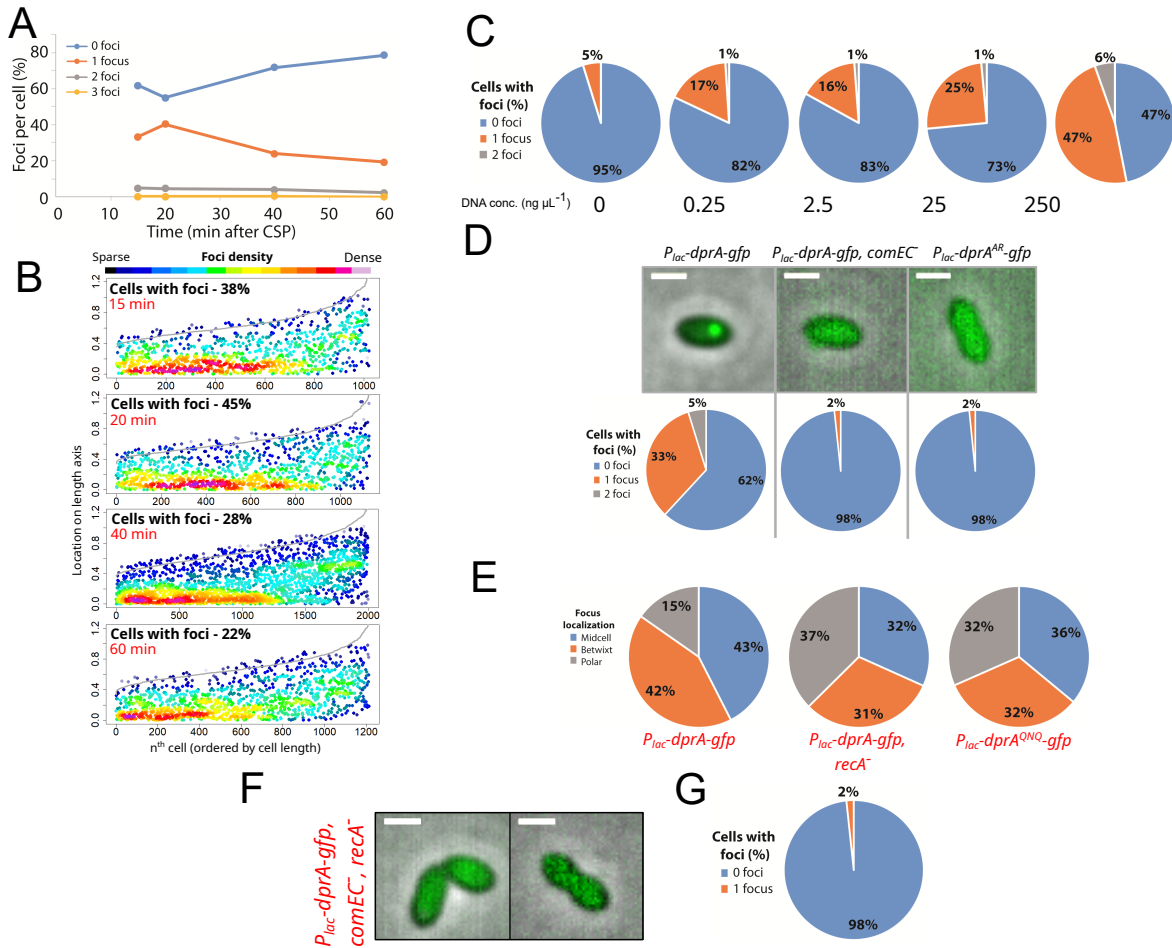

Extended Figure 2

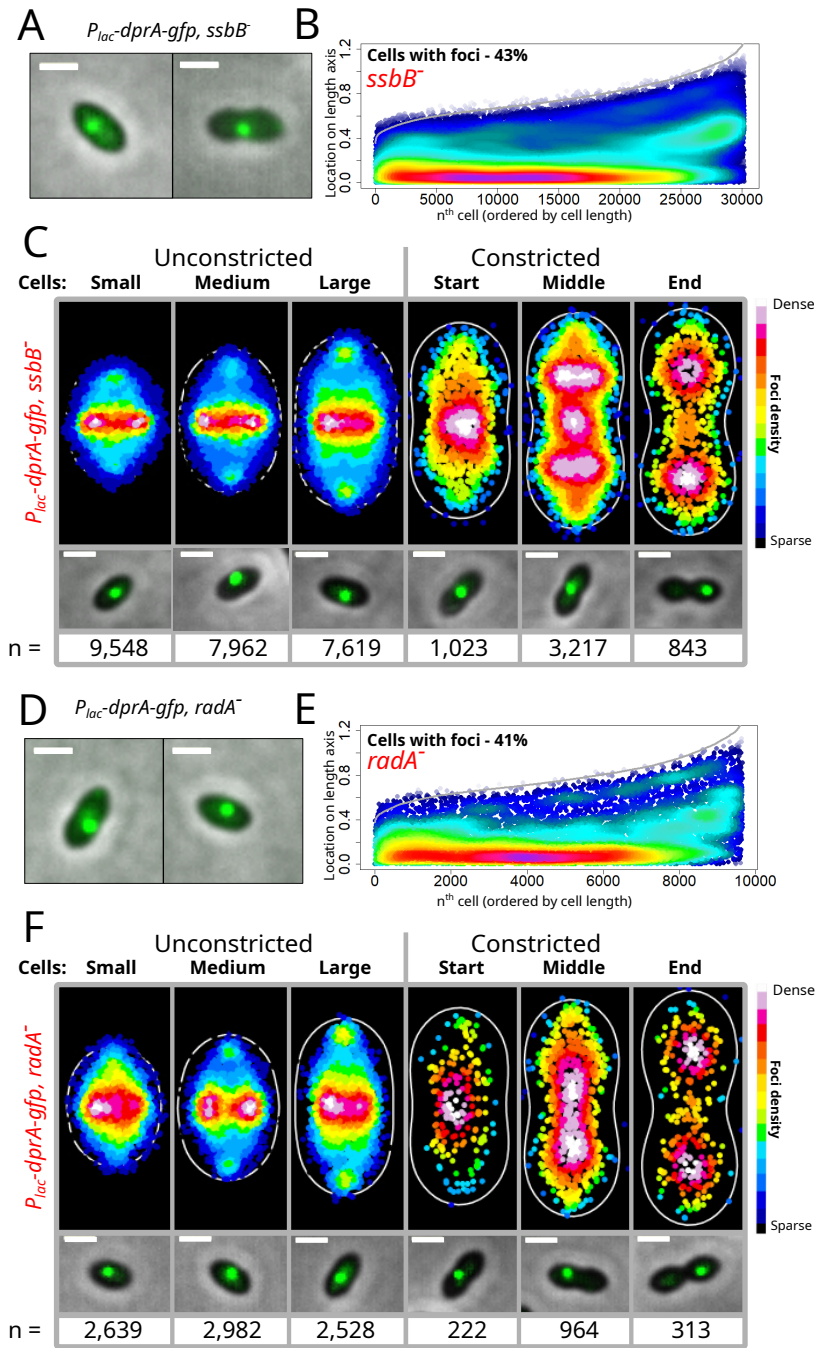

Extended Figure 3

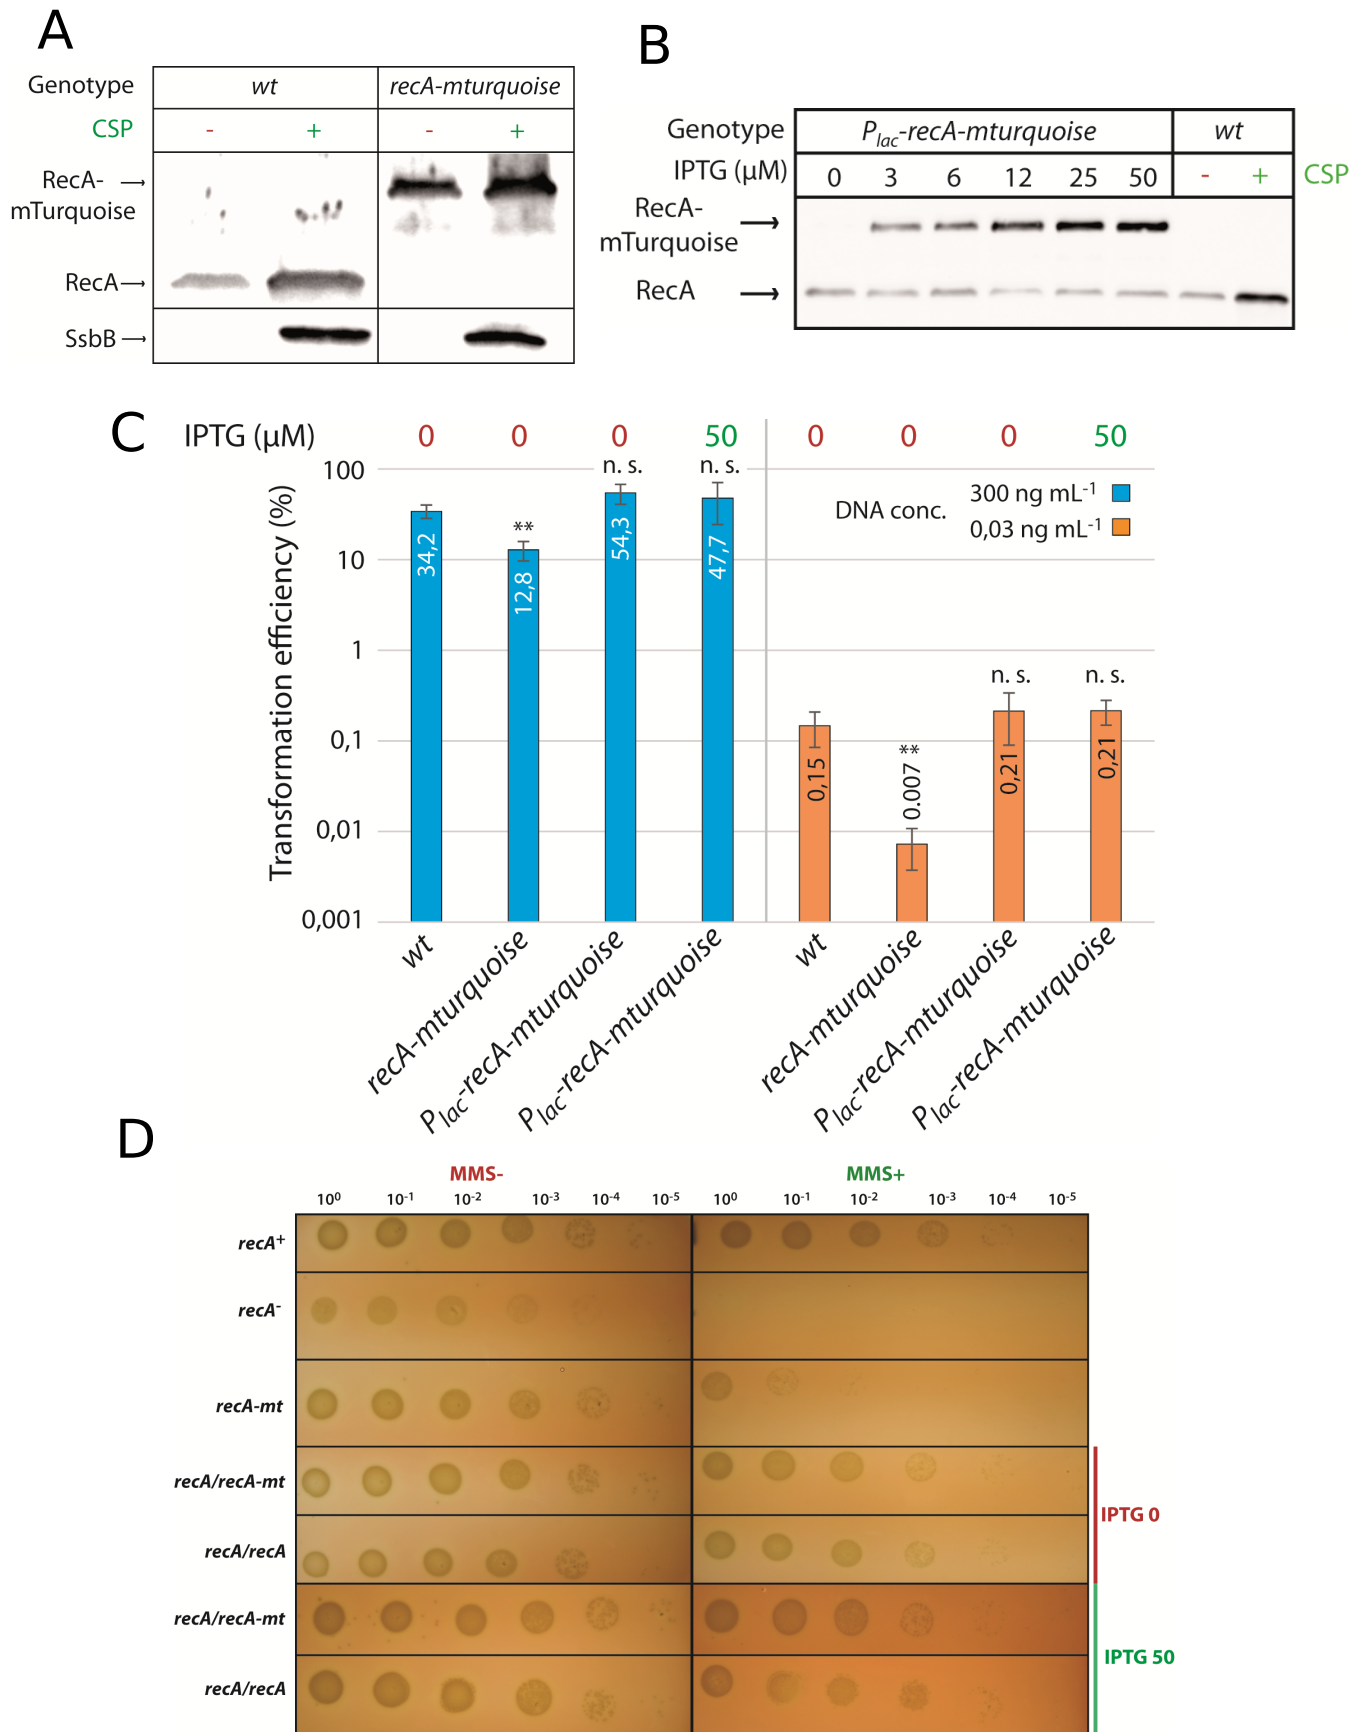

Extended Figure 4



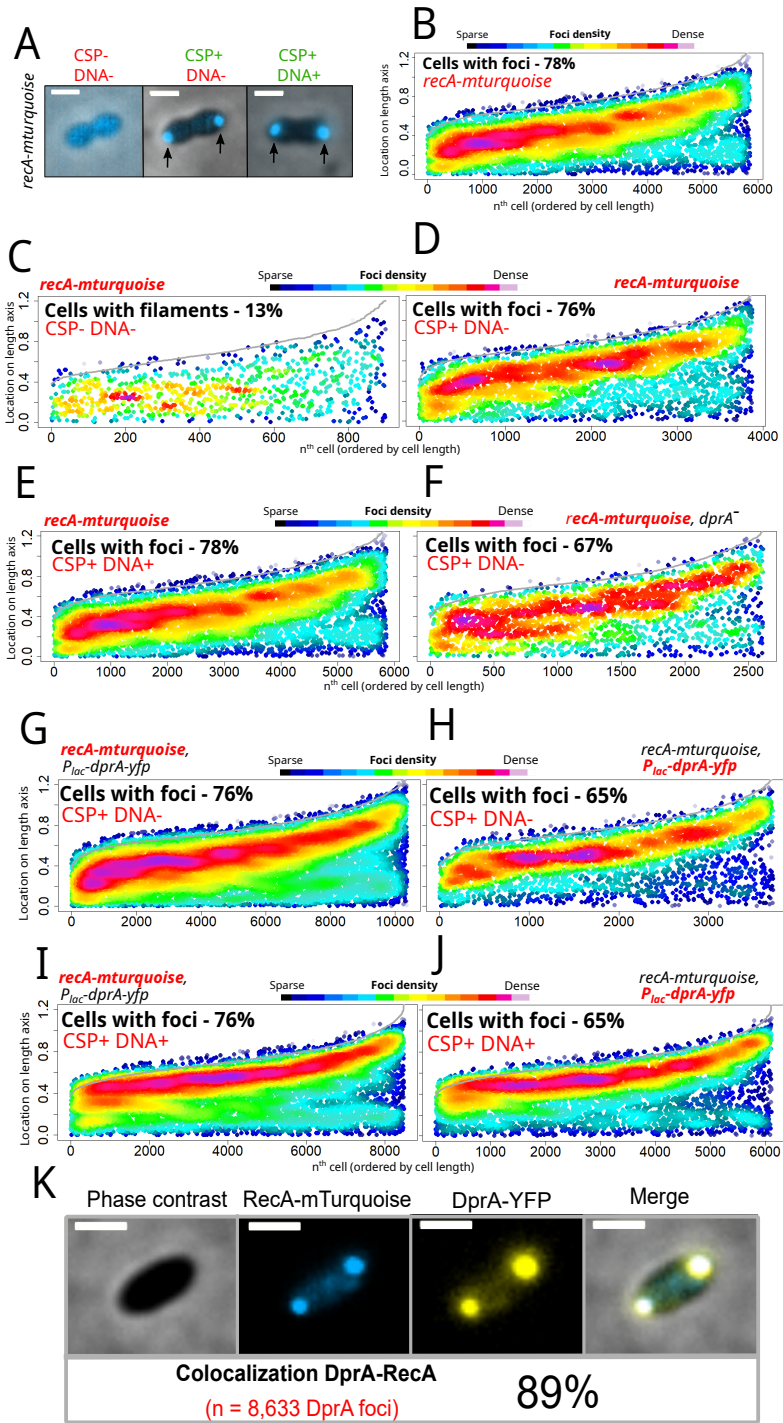

Extended Figure 5

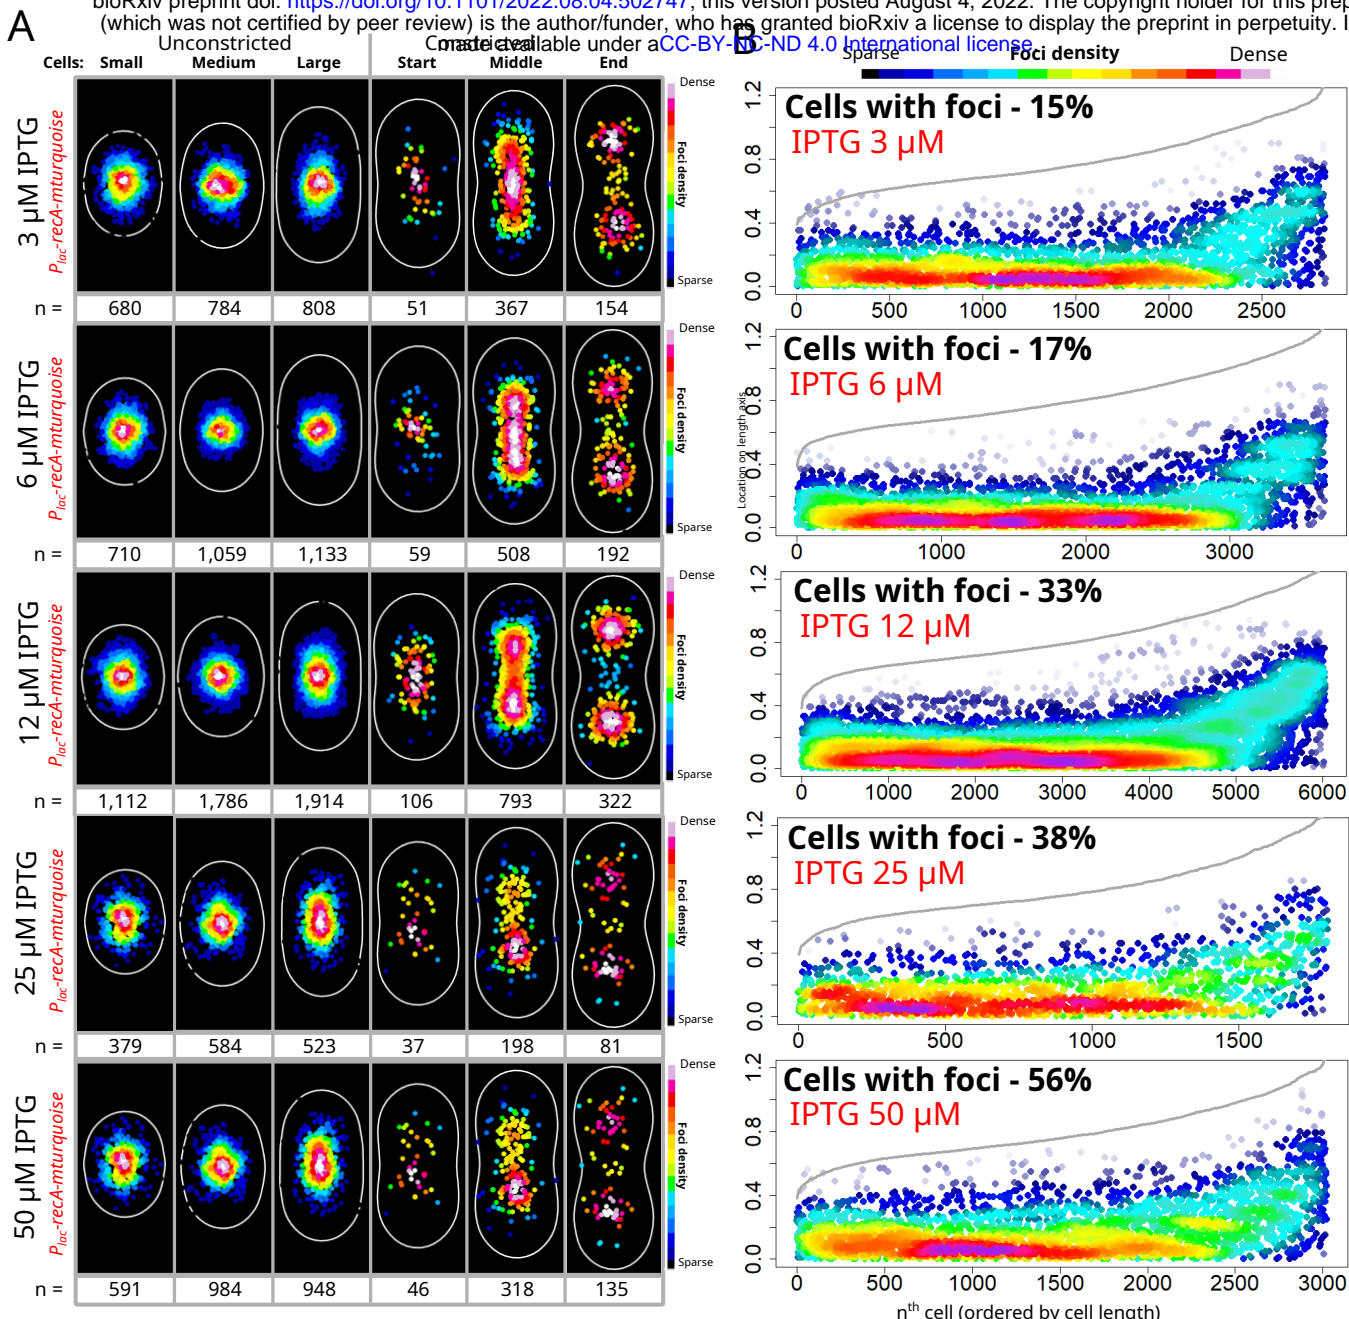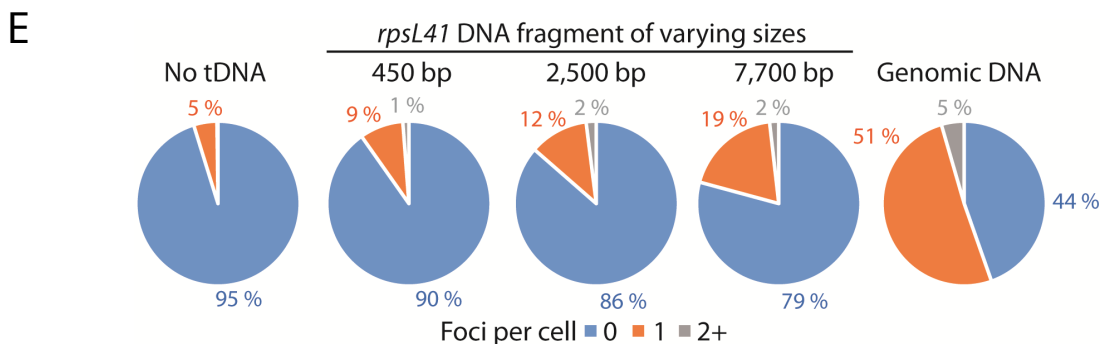

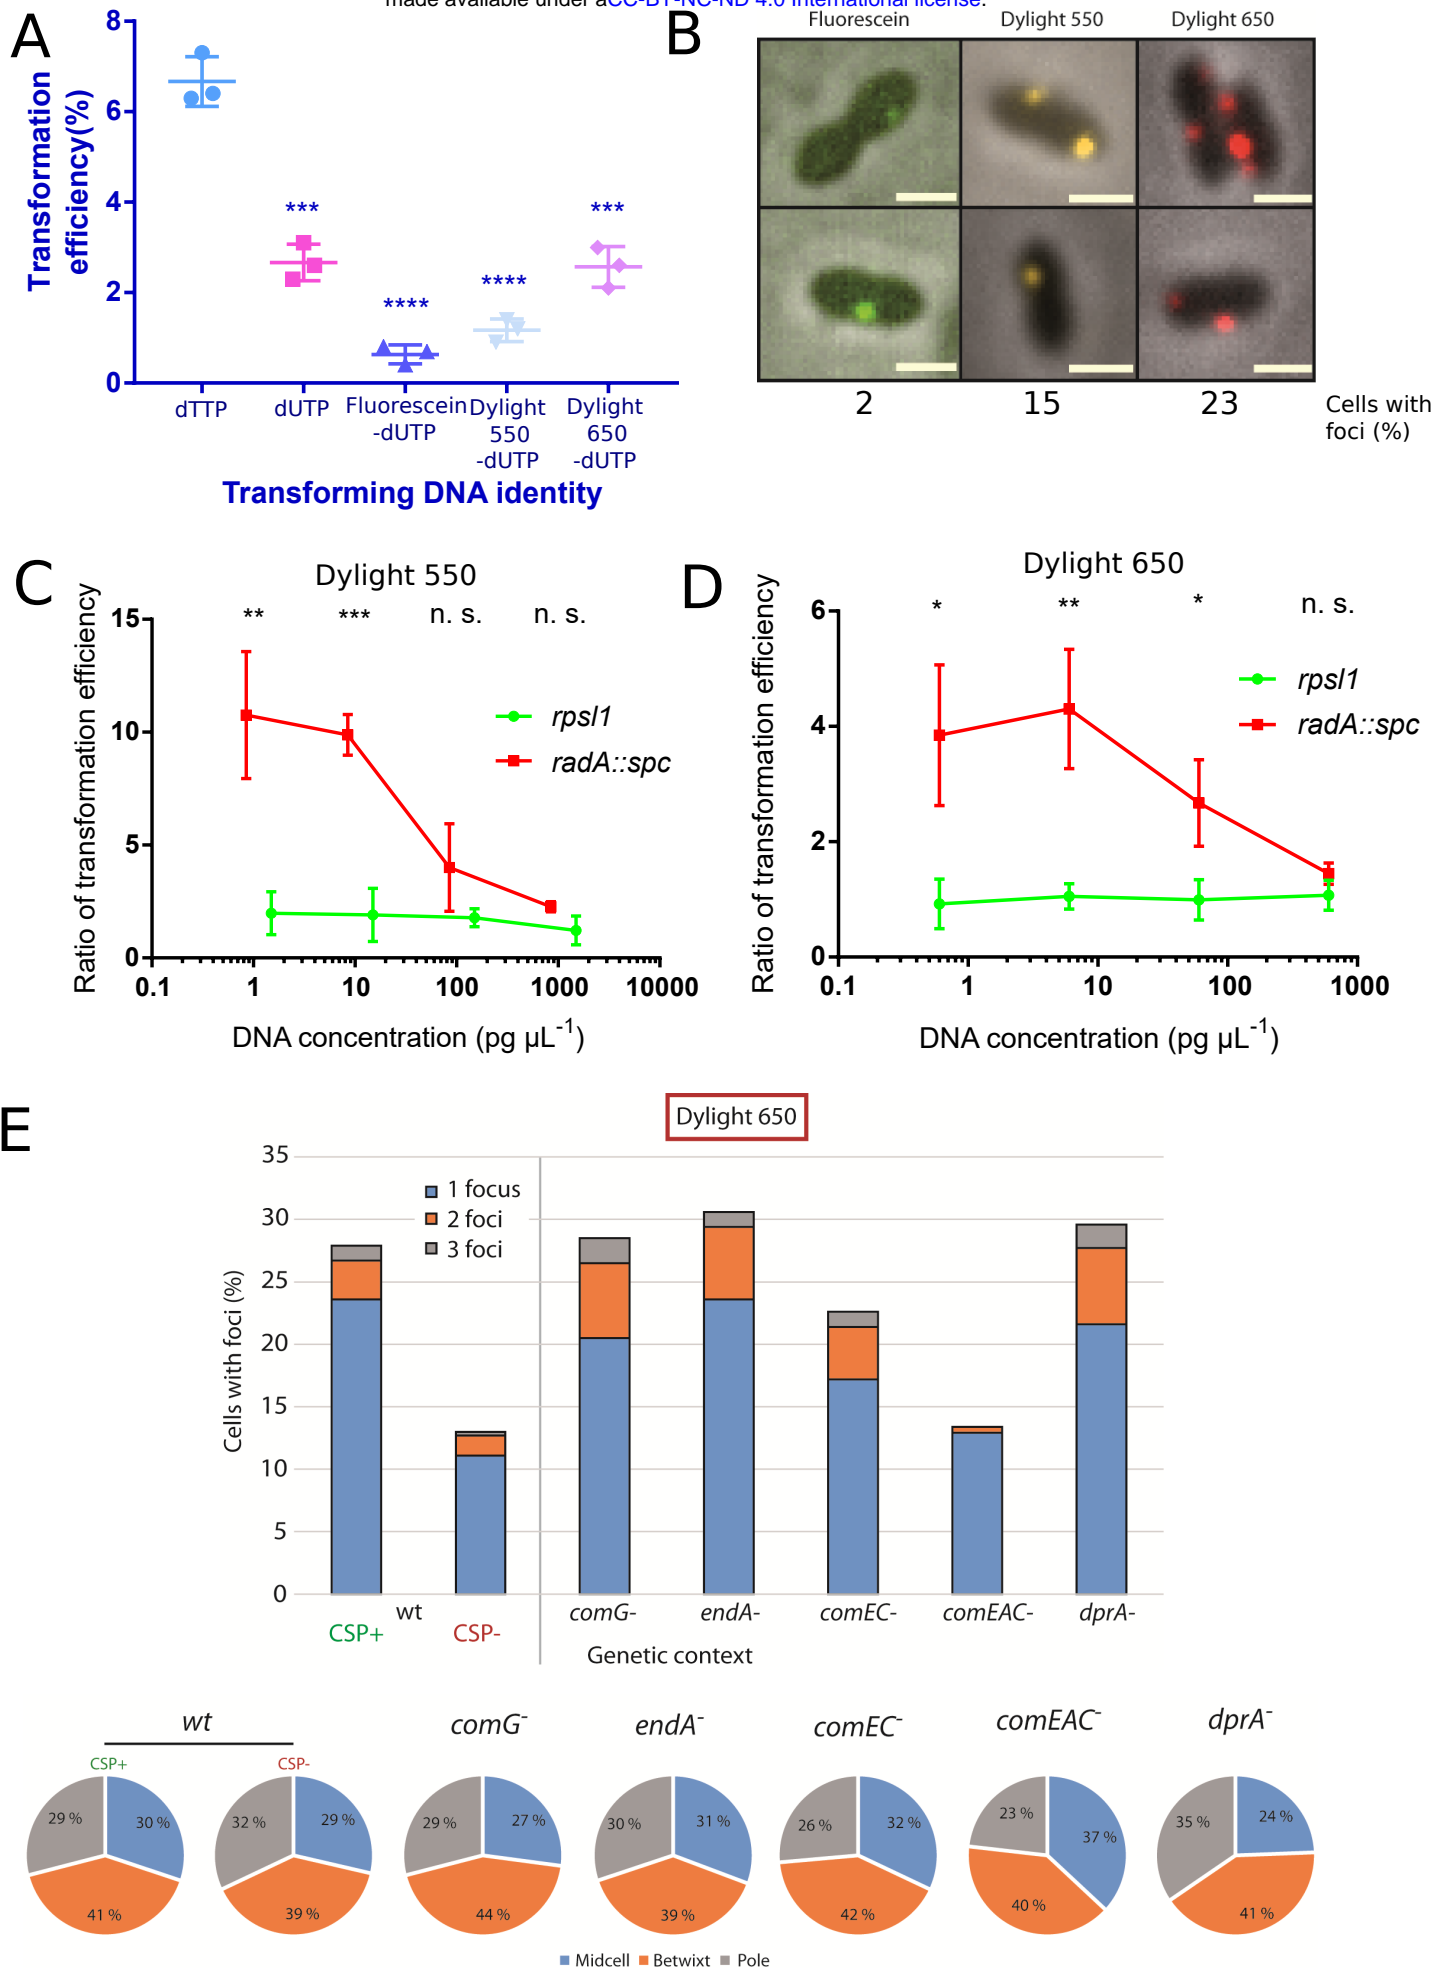

Extended Figure 7

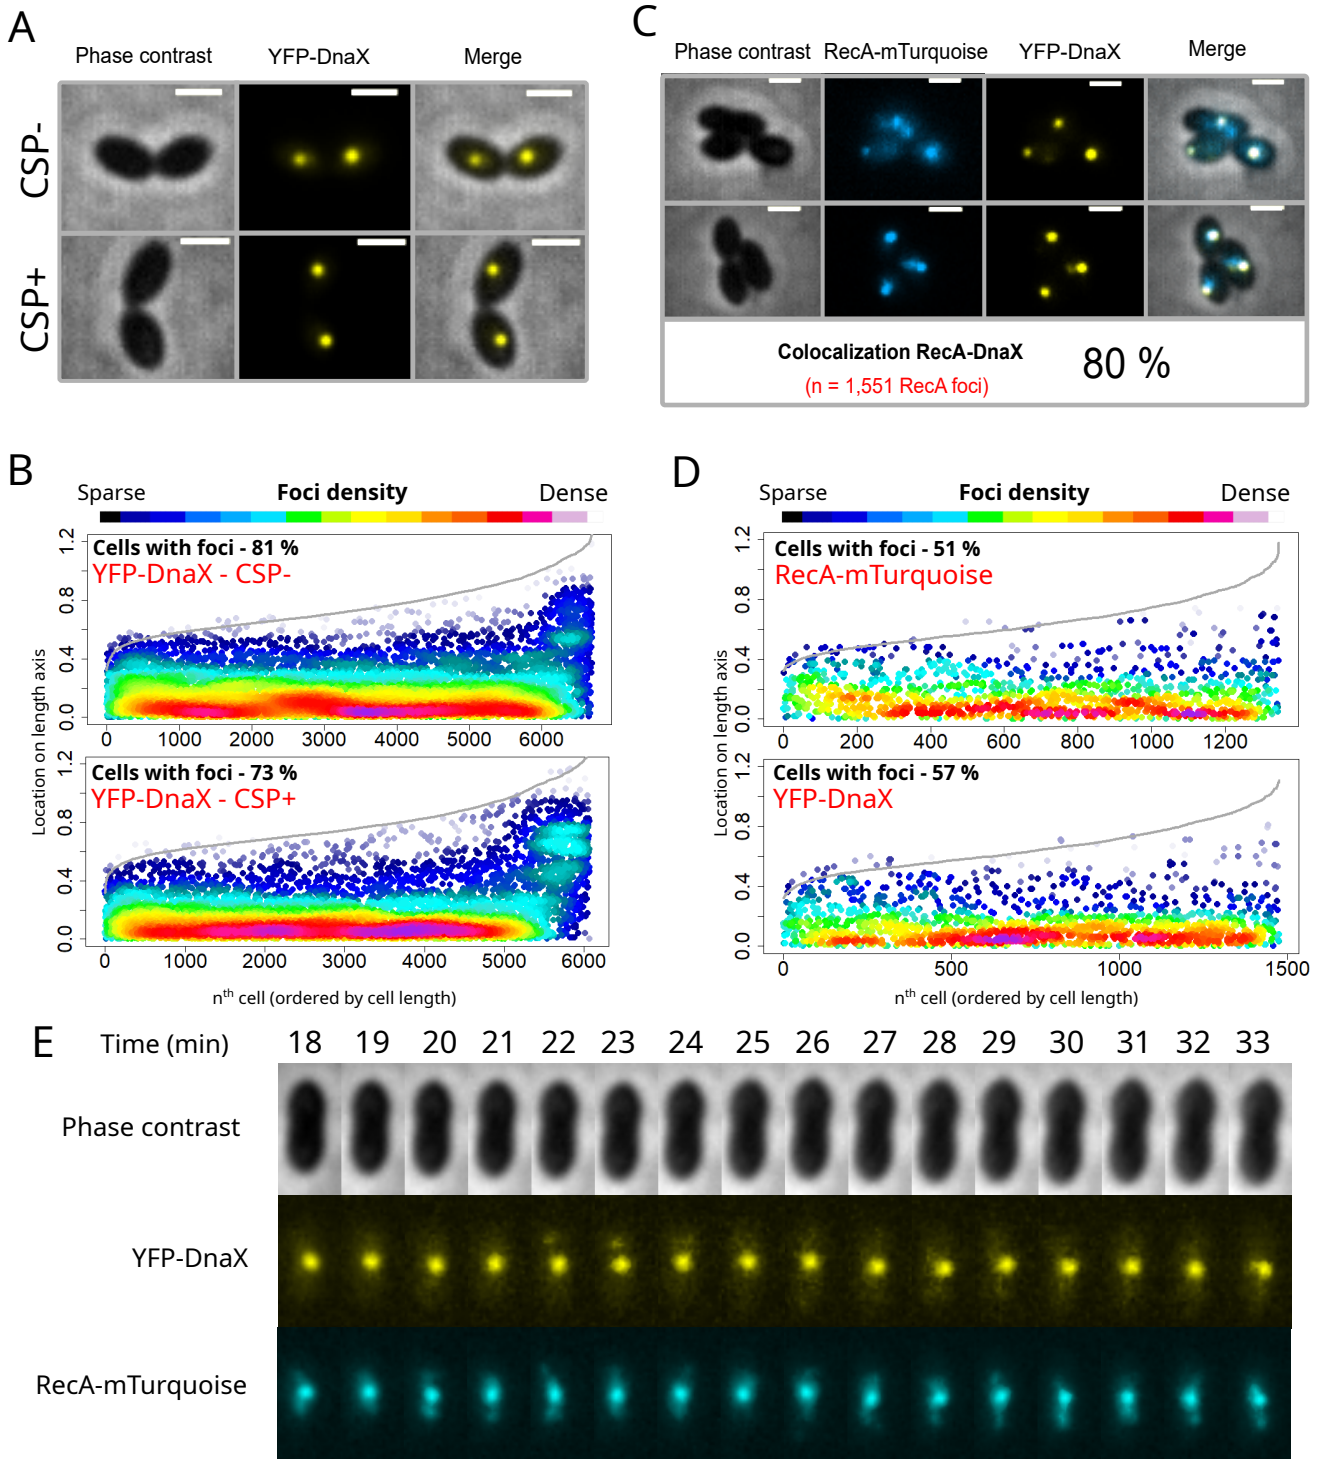

Extended Figure 8



**A**

**0 ng  $\mu\text{L}^{-1}$  norfloxacin**

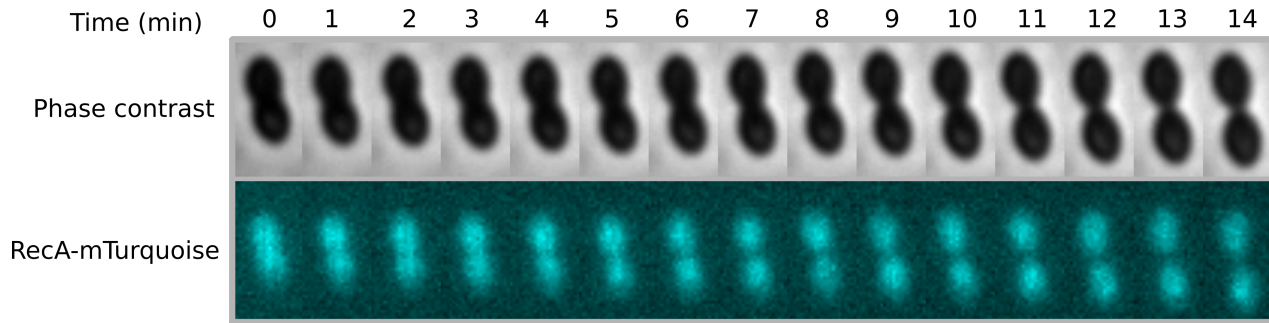

**B**

**100 ng  $\mu\text{L}^{-1}$  norfloxacin**

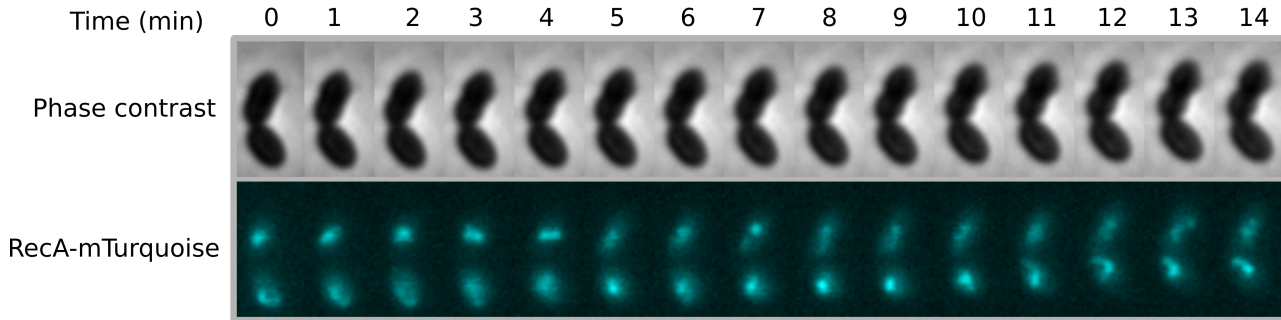

**C**

RecA-mTurquoise Phase

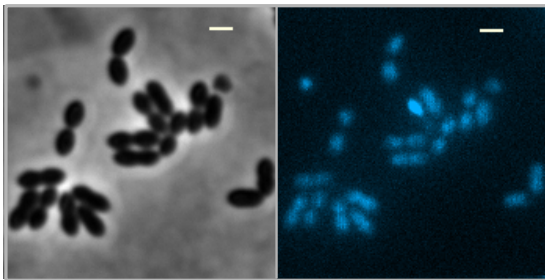

**0 ng  $\mu\text{L}^{-1}$  norfloxacin**  
Cells with filaments - 8 %

**D**

RecA-mTurquoise Phase

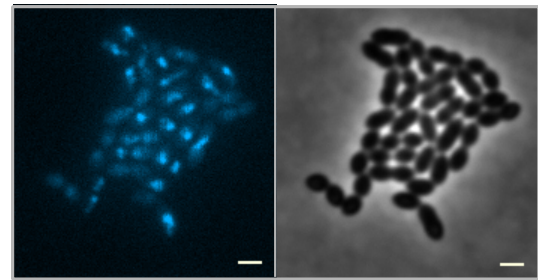

**100 ng  $\mu\text{L}^{-1}$  norfloxacin**  
Cells with filaments - 69.8 %

Extended Figure 9

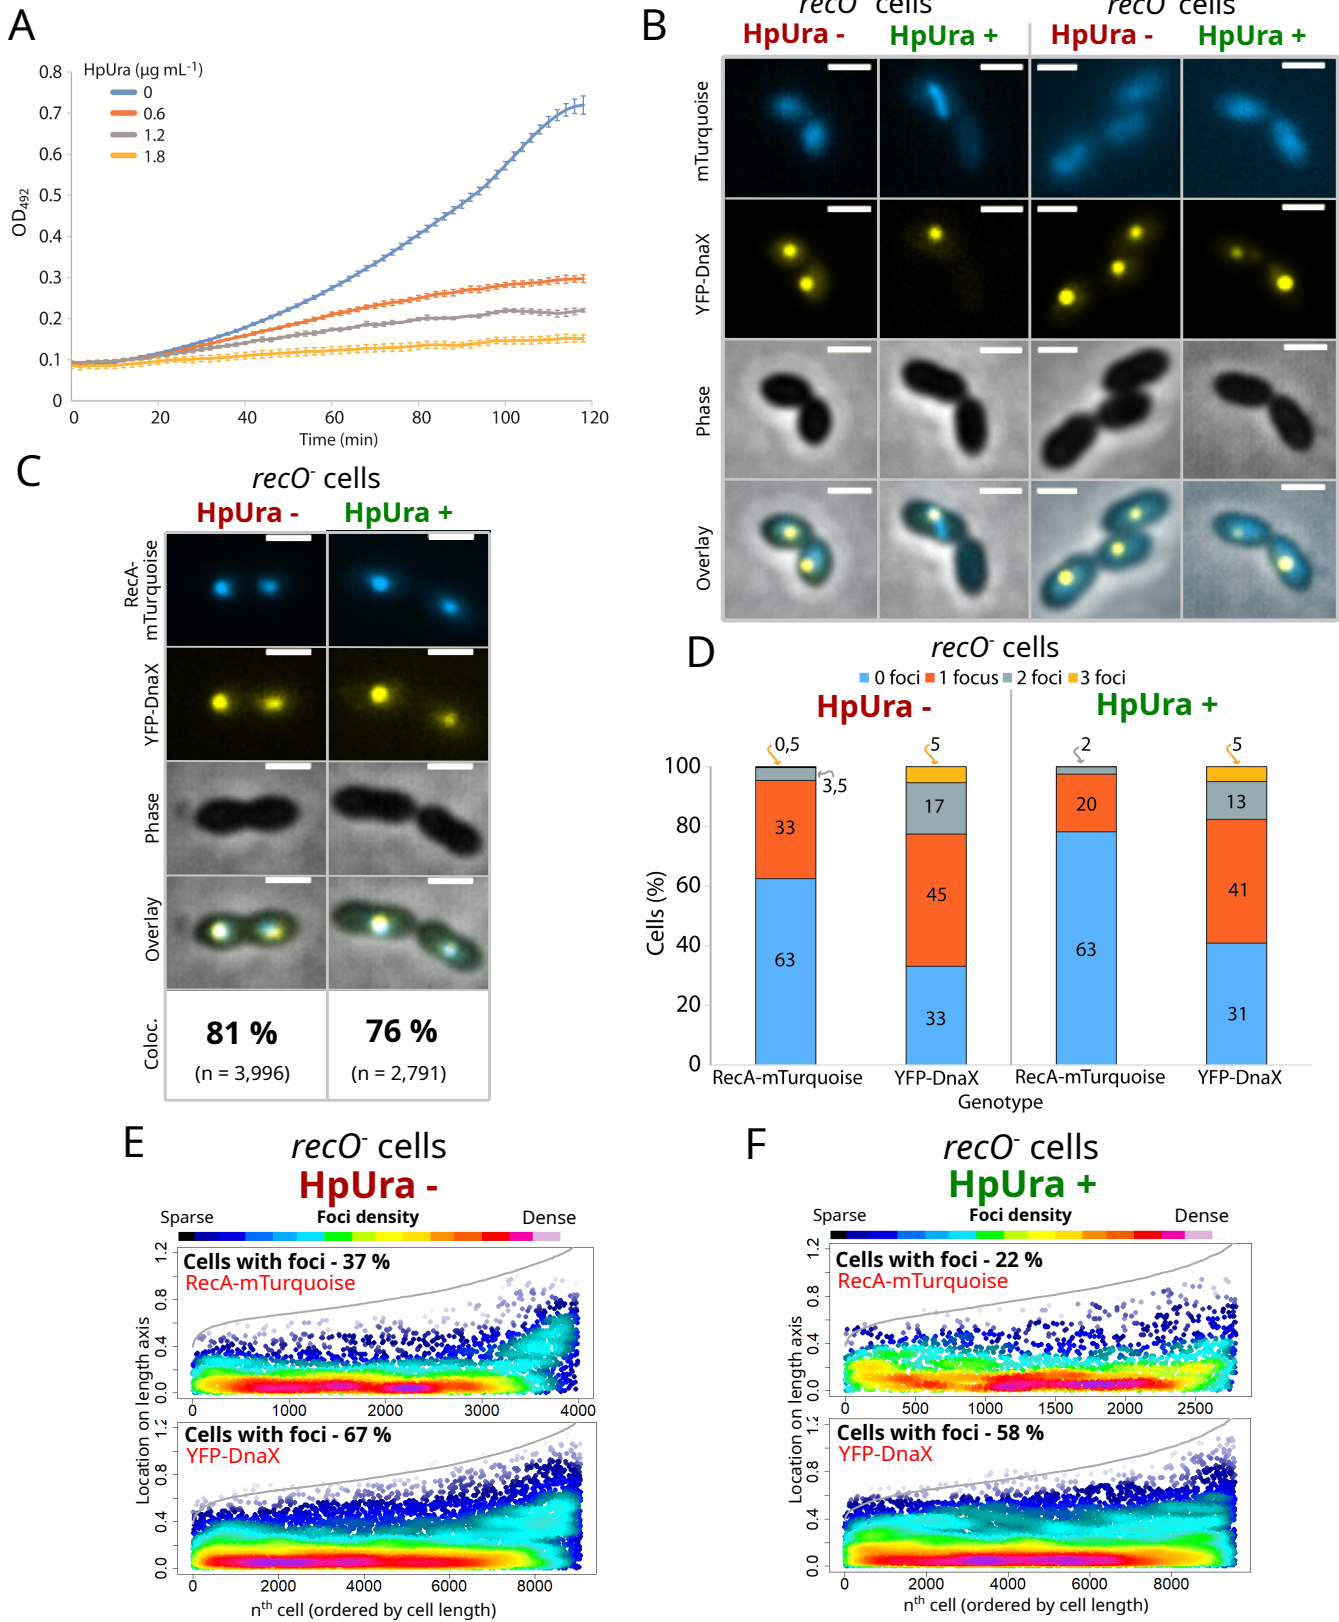

Extended Figure 10

992 **Extended Figure Legends**

993 **Extended Figure 1: DprA-GFP is fully functional for D-loop formation *in vitro*.** (A)

994 Coomassie gel showing purified DprA (30 kDa) and DprA-GFP (60 kDa) proteins. (B) Purified

995 DprA-GFP protein loads RecA onto ssDNA to stimulate D-loop formation at levels comparable

996 to wildtype DprA. D-loop assays showing stimulation of D-loop formation between the 2,680

997 bp pUC18 plasmid and a Cy3-labelled 70 nucleotide (nt) fully complementary primer by

998 varying concentrations of RecA in the presence or absence of DprA or DprA-GFP. RecA

999 concentrations in ascending order (nM); 150, 30, 600. (C) Quantification of D-loop formation

1000 carried out on the image in *panel B*.

1001

1002 **Extended Figure 2: Further analysis of localisation dynamics of  $P_{lac}$ -*dprA-gfp*** (A) Time-course

1003 experiment of low-level DprA-GFP foci per cell in competent cells. 15 min, 2,355 cells and

1004 1,023 foci analysed; 20 min, 2,260 cells and 1,129 foci analysed; 40 min, 5,988 cells and 2,001

1005 foci analysed; 60 min, 5,244 cells and 1,216 foci analysed. (B) Low level DprA-GFP foci persist

1006 at midcell up to 60 minutes after competence induction. Representations as focus density

1007 maps as described in [Figure 1C](#). Cells and foci analysed as in *panel D*. (C) Analysis of the

1008 repartition of low-level DprA-GFP foci within competent cells in a gradient of transforming

1009 DNA. 0 ng  $\mu\text{L}^{-1}$  DNA, 2,621 cells and 128 foci analysed; 0.25 ng  $\mu\text{L}^{-1}$  DNA, 2,222 cells and 425

1010 foci analysed; 2.5 ng  $\mu\text{L}^{-1}$  DNA, 6,038 cells and 1,098 foci analysed; 25 ng  $\mu\text{L}^{-1}$  DNA, 4,215 cells

1011 and 1,194 foci analysed; 250 ng  $\mu\text{L}^{-1}$  DNA, 2,190 cells and 1,313 foci analysed. (D) Sample

1012 fluorescence microscopy images and analysis of the repartition of low level DprA-GFP foci

1013 within cells of R4262 (*comC0*, *CEP<sub>lac</sub>-dprA-gfp*, *dprA::spc*), R4401 (*comC0*, *CEP<sub>lac</sub>-dprA-gfp*,

1014 *dprA::spc*, *comEC::ery*) and R4413 (*comC0*, *CEP<sub>lac</sub>-dprA<sup>AR</sup>-gfp*, *dprA::spc*) strains 15 minutes

1015 after competence induction and 5 minutes after DNA addition ( $250 \text{ ng } \mu\text{L}^{-1}$ ). Scale bars,  $1 \mu\text{m}$ .  
1016 (E) Distribution of low level DprA-GFP foci in cells of R4415 (*comC0*, *CEP<sub>lac</sub>-dprA<sup>QNO</sup>-gfp*,  
1017 *dprA::spc*) and R4429 (*comC0*, *CEP<sub>lac</sub>-dprA-gfp*, *dprA::spc*, *recA::cat*) strains 15 minutes after  
1018 competence induction and 5 minutes after DNA addition ( $250 \text{ ng } \mu\text{L}^{-1}$ ). Data taken from  
1019 **Figures 2B and 2E**. Midcell, betwixt and polar localisations defined as in **Figure 1E**. (F) Sample  
1020 fluorescence microscopy image of low level DprA-GFP foci within cells of R4618 (*comC0*,  
1021 *CEP<sub>lac</sub>-dprA-gfp*, *dprA::spc*, *comEC::trim*, *recA::cat*). Conditions as in **Figure 2B**. (G) Analysis of  
1022 the repartition of low level DprA-GFP foci within cells of R4618. 2,455 cells and 22 foci  
1023 analysed.

1024

1025 **Extended Figure 3: The absence of SsbB or RadA does not affect the localisation of early HR**  
1026 **intermediates of transformation.** (A) Sample fluorescence microscopy image of strain R4400  
1027 (*comC0*, *CEP<sub>lac</sub>-dprA-gfp*, *dprA::spc*, *ssbB::cat*) 15 minutes after competence induction and 5  
1028 minutes after DNA addition ( $250 \text{ ng } \mu\text{L}^{-1}$ ). Scale bars,  $1 \mu\text{m}$ . (B) Low cellular DprA-GFP  
1029 accumulates at midcell upon addition of transforming DNA in the absence of SsbB.  
1030 Representations as focus density maps as described in **Figure 1C**. 41,788 cells and 30,213 foci  
1031 analysed. (C) DprA-GFP localisation in the absence of SsbB represented as density heat maps  
1032 as in **Figure 2C**. Microscopy images represent sample images of each cell category showing  
1033 preferential focus localisation. Scale bars,  $1 \mu\text{m}$ . Small cells, 16,723 cells and 9,548 foci  
1034 analysed; medium cells, 11,722 cells and 7,962 foci analysed; large cells, 9,029 cells and 7,619  
1035 foci analysed; cons. start cells, 948 cells and 1024 foci analysed; cons. middle cells, 2,689 cells  
1036 and 3,217 foci analysed; cons. end cells, 677 cells and 843 foci analysed. (D) Sample  
1037 fluorescence microscopy image of strain R4625 (*comC0*, *CEP<sub>lac</sub>-dprA-gfp*, *dprA::spc*,



1038 *radA::trim*) 15 minutes after competence induction and 5 minutes after DNA addition (250 ng  
1039  $\mu\text{L}^{-1}$ ). Scale bars, 1  $\mu\text{m}$ . (E) Low cellular DprA-GFP accumulates at midcell upon addition of  
1040 transforming DNA in the absence of RadA. Representations as described in **Figure 1C**. 17,925  
1041 cells and 9,667 foci analysed. (F) DprA-GFP localisation in the absence of RadA represented as  
1042 density heat maps as in **Figure 2C**. Microscopy images represent sample images of each cell  
1043 category showing preferential focus localisation. Small cells, 7,544 cells and 2,638 foci  
1044 analysed; medium cells, 6,678 cells and 2,982 foci analysed; large cells, 5,315 cells and 2,528  
1045 foci analysed; cons. start cells, 421 cells and 222 foci analysed; cons. middle cells, 1,528 cells  
1046 and 984 foci analysed; cons. end cells, 439 cells and 313 foci analysed.

1047

1048 **Extended Figure 4: Analysis of the functionality of RecA-mTurquoise fusions.** (A) Western  
1049 blot probed with  $\alpha$ -RecA antibodies showing cellular levels of RecA and RecA-mTurquoise in  
1050 competent (CSP+) and non-competent (CSP-) cells. Samples also probed with  $\alpha$ -SsbB  
1051 antibodies to confirm induction of competence. Samples taken 15 minutes after competence  
1052 induction. Strains used; RecA, R1501 (*comC0*); RecA-mTurquoise, R4712 (*comC0*, *recA-*  
1053 *mturquoise*). (B) Western blot probed with  $\alpha$ -RecA antibodies showing cellular levels of RecA  
1054 and RecA-mTurquoise in a strain possessing *recA* and *CEP<sub>lac</sub>-recA-mturquoise* grown in varying  
1055 concentrations of IPTG and in absence of CSP. Wildtype RecA strain included as a control in  
1056 presence or absence of CSP. Strains used; RecA, R1501 (*comC0*); RecA/RecA-mTurquoise,  
1057 R4848 (*comC0*, *CEP<sub>lac</sub>-recA-mturquoise*). (C) Comparison of transformation efficiencies of  
1058 various *recA* mutant strains to wild type. Saturating (300 ng  $\text{mL}^{-1}$ ) and non-saturating (0.03 ng  
1059  $\text{mL}^{-1}$ ) concentrations of *rpsL41* PCR fragment, conferring streptomycin resistance via point  
1060 mutation, used. DNA identity; 3,434 bp *rpsL41* PCR fragment amplified from R304 strain using

1061 MB117-MB120 primer pair. Transformation pre-cultures prepared in 0 or 50  $\mu$ M IPTG as  
1062 noted. Strains used: *wt*, R1501 (*comC0*); *recA-mturquoise*, R4712 (*comC0*, *recA-mturquoise*),  
1063 *CEP<sub>lac</sub>-recA-mturquoise*, R4848 (*comC0*, *CEP<sub>lac</sub>-recA-mturquoise*). Data represented as mean  $\pm$   
1064 s.e.m. of triplicate repeats. Asterisks represent significant difference between test samples  
1065 and wildtype controls for a given DNA concentration (\*\* =  $p < 0.01$ , n. s. = not significant). (D)  
1066 Spot tests comparing growth of competent (CSP+) and non-competent (CSP-) *recA* mutants  
1067 to wildtype in presence or absence of methanemethylsulfonate (MMS, 0.02 %). Strains used:  
1068 *wt*, R1501 (*comC0*); *recA-*, (R4857, *comC0*, *recA::trim*), *recA-mturquoise*, R4712 (*comC0*, *recA-*  
1069 *mturquoise*), *CEP<sub>lac</sub>-recA-mturquoise*, R4848 (*comC0*, *CEP<sub>lac</sub>-recA-mturquoise*); R4664 (*comC0*,  
1070 *CEP<sub>lac</sub>-recA*). R4848 and R4664 grown and plated with 0 and 50  $\mu$ M IPTG to compare presence  
1071 and absence of *CEP<sub>lac</sub>-recA-mturquoise* induction.

1072

1073 **Extended Figure 5: Aberrant cellular localisation of RecA-mTurquoise fusion.** (A) Sample  
1074 microscopy images of RecA-mTurquoise in non-competent cells and competent cells in  
1075 presence or absence of homologous transforming DNA. Images taken 15 minutes after  
1076 competence induction. Strain used, R4712 (*comC0*, *recA-mturquoise*). Black arrows, polar foci.  
1077 (B) RecA-mTurquoise alone accumulates at the cell poles in a majority of transforming cells.  
1078 Representations as focus density maps as described in [Figure 1C](#). 8,125 cells and 5,858 foci  
1079 analysed. (C) RecA-mTurquoise forms centrally localised bundles in a minority of non-  
1080 competent cells. Representations as focus density maps as described in [Figure 1C](#). 5,512 cells  
1081 and 901 bundles analysed. (D) RecA-mTurquoise forms foci at the cell poles in competent cells  
1082 in absence of transforming DNA. Representations as focus density maps as described in [Figure](#)  
1083 [1C](#). 6,066 cells and 3,874 foci analysed. (E) The presence of transforming DNA does not alter

1084 the polar localisation of RecA-mTurquoise. Representations as focus density maps as  
1085 described in **Figure 1C**. 8,125 cells and 5,858 foci analysed. (F) The absence of DprA does not  
1086 alter RecA-mTurquoise localisation in competent cells. Representations as focus density maps  
1087 as described in **Figure 1C**. 6,066 cells and 3,874 foci analysed. (G) RecA-mTurquoise forms  
1088 polar foci in a strain expressing DprA-YFP in the presence of transforming DNA.  
1089 Representations as focus density maps as described in **Figure 1C**. 9,337 cells, 10,367 RecA-  
1090 mTurquoise foci analysed. Strain used, R4742, *comC0*, *P<sub>lac</sub>-dprA-yfp*, *recA-mturquoise*,  
1091 *dprA::spc*. (H) DprA-YFP forms polar foci in a strain expressing RecA-mTurquoise in the  
1092 presence of transforming DNA. Strain and images used as in *panel E*. Representations as focus  
1093 density maps as described in **Figure 1C**. 9,337 cells, 3,721 DprA-YFP foci analysed. (I) RecA-  
1094 mTurquoise forms polar foci in a strain expressing DprA-YFP in the presence of transforming  
1095 DNA. Representations as focus density maps as described in **Figure 1C**. 7,074 cells, 8,493  
1096 RecA-mTurquoise foci analysed. Strain used as in *panel E*. (J) DprA-YFP forms polar foci in a  
1097 strain expressing RecA-mTurquoise in the presence of transforming DNA. Images used as in  
1098 *panel G*. Representations as focus density maps as described in **Figure 1C**. 7,074 cells, 6,120  
1099 DprA-YFP foci analysed. Strain used as in *panel E*. (K) Sample microscopy images of a strain  
1100 expressing low level DprA-YFP and RecA-mTurquoise in competent, transforming cells and  
1101 colocalisation of DprA-YFP with RecA-mTurquoise in these cells. Images taken 15 minutes  
1102 after competence induction and 5 minutes after DNA addition (250 ng  $\mu\text{L}^{-1}$ ). Scale bars, 1  $\mu\text{m}$ .  
1103 Phase, phase contrast images of cells; overlay, overlay of all 3 other images. Strain used as in  
1104 *panels I and J*.

1105

1106 **Extended Figure 6: Reducing cellular levels of RecA-mTurquoise in a mixed filament strain**  
1107 **reduces midcell accumulation in transforming cells.** (A) Heatmaps of RecA-mTurquoise foci

1108 in competent, transforming RecA/RecA-mTurquoise cells grown in varying IPTG  
1109 concentrations of IPTG (3-50  $\mu$ M), as described in **Figure 2C**. Strain used: R4848, *comC0*,  
1110 *CEP<sub>lac-recA-mturquoise</sub>*. 3  $\mu$ M IPTG, Small cells, 7,056 cells and 680 foci analysed; medium  
1111 cells, 3,594 cells and 784 foci analysed; large cells, 3,012 cells and 808 foci analysed; cons.  
1112 start cells, 282 cells and 51 foci analysed; cons. middle cells, 964 cells and 367 foci analysed;  
1113 cons. end cells, 321 cells and 154 foci analysed. 6  $\mu$ M IPTG, Small cells, 8,533 cells and 710  
1114 foci analysed; medium cells, 4,617 cells and 1,059 foci analysed; large cells, 3,911 cells and  
1115 1,133 foci analysed; cons. start cells, 321 cells and 59 foci analysed; cons. middle cells, 1,238  
1116 cells and 508 foci analysed; cons. end cells, 362 cells and 192 foci analysed. 12  $\mu$ M IPTG, Small  
1117 cells, 6,037 cells and 1,112 foci analysed; medium cells, 3,424 cells and 1,786 foci analysed;  
1118 large cells, 3,089 cells and 1,914 foci analysed; cons. start cells, 229 cells and 106 foci  
1119 analysed; cons. middle cells, 854 cells and 793 foci analysed; cons. end cells, 271 cells and 322  
1120 foci analysed. 25  $\mu$ M IPTG, Small cells, 1,187 cells and 379 foci analysed; medium cells, 1,002  
1121 cells and 584 foci analysed; large cells, 806 cells and 523 foci analysed; cons. start cells, 49  
1122 cells and 37 foci analysed; cons. middle cells, 186 cells and 198 foci analysed; cons. end cells,  
1123 66 cells and 81 foci analysed. 50  $\mu$ M IPTG, Small cells, 923 cells and 591 foci analysed; medium  
1124 cells, 1,242 cells and 984 foci analysed; large cells, 958 cells and 948 foci analysed; cons. start  
1125 cells, 45 cells and 46 foci analysed; cons. middle cells, 229 cells and 318 foci analysed; cons.  
1126 end cells, 84 cells and 135 foci analysed. (B) Focus density maps of RecA-mTurquoise foci in  
1127 competent, transforming RecA/RecA-mTurquoise cells as described in **Figure 2B**. Strains,  
1128 conditions and images used as in *panel A*. 3  $\mu$ M IPTG, 15,229 cells and 2,844 foci analysed; 6  
1129  $\mu$ M IPTG, 18,982 cells and 3,661 foci analysed; 12  $\mu$ M IPTG, 13,940 cells and 6,033 foci  
1130 analysed; 25  $\mu$ M IPTG, 3,296 cells and 1,802 foci analysed; 50  $\mu$ M IPTG, 3,481 cells and 3,022  
1131 foci analysed. (C) Percentage of RecA-mTurquoise foci in RecA/RecA-mTurquoise cells grown

1132 in varying IPTG concentrations. Strains, conditions and images used as in *panel A*. (D) Cellular  
1133 localisation of RecA-mTurquoise foci in RecA/RecA-mTurquoise cells grown in varying IPTG  
1134 concentrations. Strains, conditions and images used as in *panel A*. (E) RecA-mTurquoise foci  
1135 per cell in transformation experiments using DNA fragments of varying sizes. Strain used,  
1136 R4848 (*comCO*, *CEP<sub>lac</sub>-recA-mturquoise*).

1137

1138 **Extended Figure 7: Exploration of fluorescent DNA internalisation during pneumococcal**  
1139 **transformation.** (A) Comparison of transformation of *rpsL41* PCR fragments containing either  
1140 dTTP or dUTP. dUTP bases were either unlabelled, labelled with fluorescein, or labelled with  
1141 amino-allyl and tagged with Dylight 550 or 650 fluorophores. Asterisks represent significant  
1142 difference between test samples and dTTP control (\*\* =  $p < 0.005$ , \*\*\*\* =  $p < 0.001$ ). dUTP,  
1143  $p = 0.0005$ ; d-UTP-fluorescein,  $p < 0.0001$ ; d-UTP-Dylight 550,  $p < 0.0001$ ; d-UTP-Dylight 650,  
1144  $p = 0.0006$ . (B) Comparison of microscopy images of competence cells of R1501 (*comCO*)  
1145 transformed with DNA labelled with fluorescein, Dylight 550 or 650. Analysis of microscopy  
1146 images of cells transformed with DNA labelled with various fluorophores, showing cells  
1147 possessing detectable fluorescent foci. (C) Comparison of transformation efficiency of Dylight  
1148 550 transformed with PCR fragments of *rpsL41* or *radA::spc* in a concentration gradient of  
1149 transforming DNA. Values plotted represent ratios of transformation efficiency between  
1150 labelled and unlabelled PCR fragments. Strain used as in *panel A*. Asterisks represent significant  
1151 difference ratios for each PCR fragment (\*\* =  $p < 0.01$ , \*\*\* =  $p < 0.005$ , n. s., not significant).  
1152  $\sim 1 \text{ pg } \mu\text{L}^{-1}$  DNA,  $p = 0.0069$ ;  $\sim 10 \text{ pg } \mu\text{L}^{-1}$  DNA,  $p = 0.0007$ ;  $\sim 100 \text{ pg } \mu\text{L}^{-1}$  DNA,  $p = 0.12$ ;  $\sim 1,000$   
1153  $\text{pg } \mu\text{L}^{-1}$  DNA,  $p = 0.056$ . (D) Comparison of transformation efficiency of Dylight 650  
1154 transformed with PCR fragments of *rpsL41* or *radA::spc* in a concentration gradient of

1155 transforming DNA. Values plotted as in *panel C*. Strain used as in *panel A*. Asterisks represent  
1156 significant difference ratios for each PCR fragment (\* =  $p < 0.05$ , \*\* =  $p < 0.01$ , n. s., not  
1157 significant).  $\sim 1 \text{ pg } \mu\text{L}^{-1}$  DNA,  $p = 0.017$ ;  $\sim 10 \text{ pg } \mu\text{L}^{-1}$  DNA,  $p = 0.006$ ;  $\sim 100 \text{ pg } \mu\text{L}^{-1}$  DNA,  $p = 0.025$ ;  
1158  $\sim 1,000 \text{ pg } \mu\text{L}^{-1}$  DNA,  $p = 0.11$ . (E) Comparison of foci present in cells of various transformasome  
1159 mutants after exposure to Dylight 650-labelled *rpsL41* PCR fragments. Strains used: wt, R1501  
1160 (*comC0*); *comG*<sup>-</sup>, R4655 (*comC0*, *comC-luc*, *comG::kan*); *endA*<sup>-</sup>, R2811 (*comC0*, *endA::cat*);  
1161 *comEC*<sup>-</sup>, R2586 (*comC0*, *comEC::ery*); *comEAC*<sup>-</sup>, R4653 (*comC0*, *comC-luc*, *comEAC::spc*); *dprA*<sup>-</sup>  
1162 , R2018 (*comC0*, *dprA::spc*). (F) Comparison of focus localisation in cells of various  
1163 transformasome mutants after exposure to Dylight 650-labelled *rpsL41* PCR fragments.  
1164 Strains used as in *panel E*.

1165

1166 **Extended Figure 8: Further exploration of interaction between replication and**  
1167 **transformation machineries.** (A) Sample microscopy images of cells possessing YFP-DnaX in  
1168 competence and non-competent cells. Strain used, R4840 (*comC0*, *ssbB::luc*, *CEP<sub>M</sub>-yfp-dnaX*,  
1169 *CEP<sub>II</sub>-P<sub>lac</sub>-recA-mturquoise*). (B) Competence mediates a slight reduction in YFP-DnaX foci.  
1170 Representations as focus density maps as described in [Figure 1C](#). CSP<sup>-</sup>, 7,911 cells and 6,947  
1171 foci analysed. CSP<sup>+</sup>, 8,425 cells and 6,055 foci analysed. (C) RecA-mTurquoise and YFP-DnaX  
1172 colocalise in competent cells in the presence of heterologous tDNA (*E. coli* gDNA). Strain used,  
1173 R4840 (*comC0*, *ssbB::luc*, *CEP<sub>M</sub>-yfp-dnaX*, *CEP<sub>II</sub>-P<sub>lac</sub>-recA-mturquoise*). 2,443 cells, 1,345 RecA-  
1174 mTurquoise foci and 1,475 YFP-DnaX foci analysed. (D) Focus density maps of RecA-  
1175 mTurquoise and YFP-DnaX, as described in [Figure 1C](#). Strain, cell and foci details as in *panel C*.  
1176 (E) Time-lapse images of RecA-mTurquoise and YFP-DnaX with time representing time after  
1177 CSP addition (tDNA added at  $t = 10 \text{ min}$ ). Strain used as in *panel C*.

1178

1179 **Extended Figure 9: Exploring RecA-mTurquoise filaments and their physiological relevance**

1180 **in genome maintenance.** (A) Most RecA/RecA-mTurquoise cells do not display RecA-

1181 mTurquoise accumulation in absence of norfloxacin exposure. RecA-mTurquoise observed

1182 during time-lapse microscopy of strain R4848 (*comC0*, *CEPlac-recA-mturquoise*). Images taken

1183 every 1 min. (B) Most RecA/RecA-mTurquoise cells display RecA-mTurquoise accumulation

1184 into filaments in presence of norfloxacin. RecA-mTurquoise observed during time-lapse

1185 microscopy of strain R4848 (*comC0*, *CEPlac-recA-mturquoise*) after 20 min exposure to 100 ng

1186  $\mu\text{L}^{-1}$  norfloxacin (MIC 3 ng  $\mu\text{L}^{-1}$ ). Images taken every 1 min. (C) Single image of cells showing

1187 lack of RecA-mTurquoise accumulation in absence of norfloxacin exposure. Scale bar, 1  $\mu\text{m}$ .

1188 Strain used as in *panel A*. (D) Single image of cells showing RecA-mTurquoise filamentation in

1189 almost all cells after norfloxacin exposure. Scale bar, 1  $\mu\text{m}$ . Strain used as in *panel A*.

1190

1191 **Extended Figure 10: Early HR intermediates of transformation can access stalled replication**

1192 **forks.** (A) Growth of pneumococcal cells in presence of varying concentrations of HpUra.

1193 Strain used, R1501 (*comC0*). (B) Comparison of RecA/RecA-mTurquoise and YFP-DnaX

1194 localisation in non-competent *recO<sup>+/-</sup>* cells exposed to HpUra (1,8  $\mu\text{g mL}^{-1}$ ) or not. (C)

1195 Colocalisation of RecA-mTurquoise and YFP-DnaX foci in competent *recO<sup>-</sup>* cells transformed

1196 with homologous tDNA in presence or absence of HpUra. Strain used, R4892 (*comC0*,

1197 *ssbB::luc*, *CEP<sub>M</sub>-yfp-dnaX*, *CEP<sub>II</sub>-Plac-recA-mturquoise*, *recO::spc*). HpUra-, 9,391 cells, 3,996

1198 RecA-mTurquoise foci and 9,072 YFP-DnaX foci analysed. HpUra+, 11,358 cells, 2,791 RecA-

1199 mTurquoise foci and 9,555 YFP-DnaX foci analysed. (D) Distribution of RecA-mTurquoise and

1200 YFP-DnaX foci per cell. Strain and data used as in *panel C*. (E) Focus density maps of RecA-

1201 mTurquoise and YFP-DnaX in transforming *recO*<sup>-</sup> cells in the absence of HpUra. Strain and data  
1202 used as in *panel C*. (F) Focus density maps of RecA-mTurquoise and YFP-DnaX in transforming  
1203 *recO*<sup>-</sup> cells in the presence of HpUra. Strain and data used as in *panel C*.

1204

1205

1206

1207

1208

1209

1210

1211

1212

1213

1214

1215

1216

1217

1218

1219



1220 **Movie Legends**

1221 **Movie 1: Early HR intermediates visualised via DprA-mTurquoise navigate with the dynamic**  
1222 **replisome around midcell during transformation of competent pneumococci.** Time-lapse  
1223 microscopy of strain R4631 (*comC0*, *CEP<sub>M</sub>-yfp-dnaX*, *CEP<sub>II</sub>-P<sub>lac</sub>-dprA-mturquoise*, *dprA::spc*).  
1224 Images taken at two minute intervals starting 10 min after competence induction and 5 min  
1225 after DNA addition. Still images from Movie used to make **Figure 4D**.

1226

1227 **Movie 2 – RecA-mTurquoise does not accumulate into filaments in most RecA/RecA-**  
1228 **mTurquoise cells in the absence of norfloxacin exposure.** Time-lapse microscopy of  
1229 individual cell of strain R4848 (*comC0*, *CEP<sub>lac</sub>-recA-mturquoise*) in the absence of norfloxacin.  
1230 Images taken at 1 min intervals. Still image from movie used in **Extended Figure 9A**.

1231

1232 **Movie 3 – RecA-mTurquoise accumulates into filaments in most RecA/RecA-mTurquoise**  
1233 **cells after norfloxacin exposure.** Time-lapse microscopy of individual cell of strain R4848  
1234 (*comC0*, *CEP<sub>lac</sub>-recA-mturquoise*) in the presence of norfloxacin (100 ng  $\mu\text{L}^{-1}$ ). Images taken at  
1235 1 min intervals. Still image from movie used in **Extended Figure 9B**.

1236

1237 **Movie 4: Early HR intermediates visualised via RecA-mTurquoise navigate with the dynamic**  
1238 **replisome around midcell during transformation of competent pneumococci.** Time-lapse  
1239 microscopy of strain R4840 (*comC0*, *CEP<sub>M</sub>-yfp-dnaX*, *CEP<sub>II</sub>-P<sub>lac</sub>-recA-mturquoise*) taken using  
1240 microfluidics. Images taken at one min intervals starting 5 min after competence induction  
1241 and immediately upon DNA addition. Still images from Movie used to make **Figure 5E**.

## 1242 **Supplementary information**

1243

## 1244 **Supplementary Materials and Methods**

### 1245 ***Protein purification***

1246 To purify DprA-GFP, the *dprA-gfp* sequence was amplified from R3728<sup>38</sup> using primer  
1247 pair oALS12 and oALS13; The resulting DNA fragment was digested with *EcoRI* and *EagI*  
1248 restriction enzymes and ligated into a pET21 vector digested with the same enzymes to  
1249 generate the pALS1 plasmid. This plasmid was transformed into *Escherichia coli* Rosetta cells  
1250 and cells were grown at 37 °C to OD<sub>550</sub> 0.8 with 0.5 mM IPTG to stimulate DprA-GFP  
1251 expression. Purification was achieved by sequential passage through three columns as  
1252 follows; HiTrap Heparin HP 1 mL, gel filtration Superdex 200 Hiload 16/60, HiTrap Q HP 1 mL.

1253

### 1254 ***In vitro HR assays***

1255 HR assays were carried out as follows. 75 nM of DprA or DprA-GFP were incubated at  
1256 37 °C for 10 min with varying concentrations of wild type RecA (150, 300, 600 nM) in the  
1257 presence of 10 nM of Cy3-tagged ovio54 primer (70 nt, fully homologous sequence to pUC18),  
1258 10 mM MgOAc and 2 mM ATP. 5 mM of pUC18 plasmid was then added followed by  
1259 incubation at 37 °C for 10 min. A 1/20 volume of xylene cyanol was added and samples were  
1260 then denatured by addition of 0.1 % SDS and 10 mM EDTA followed by 3 min incubation at 37  
1261 °C. Samples were then run on a 1.25 % TBE gel for 60 min at 50 V and DNA was then directly  
1262 detected on the gel using the Typhoon Trio. Quantification of HR was carried out using  
1263 MultiGauge software.

1264

### 1265 ***Plasmid and strain construction***

1266 Here we describe how the new plasmids and mutant strains used in this study were  
1267 generated. Previously published constructs and mutants were simply transferred from  
1268 published strains by transformation with appropriate selection. The pCJ1 plasmid was  
1269 generated by removing the MCS from the *pUC57-CEP<sub>II</sub>R-comX* plasmid<sup>66</sup>. To achieve this, the  
1270 plasmid was digested with *EcoRV* enzyme, and the insert side recovered. The pUC57 side of  
1271 the plasmid was amplified with primer pair CJ735-CJ736, each possessing *EcoRV* enzyme sites,  
1272 removing the MCS site in the process. The insert and PCR were ligated together to generate  
1273 pCJ1. The pCJ2 plasmid was generated by amplifying a *lacI-P<sub>lac</sub>* PCR fragment from R3833 with  
1274 primer pair CJ567-CJ730 and a *dprA-mturquoise* PCR fragment from R4062 with primer pair  
1275 CJ731-CJ595. pCJ1 was digested by *Sall* and *KpnI* enzymes, *lacI-P<sub>lac</sub>* by *Sall* and *NcoI* enzymes  
1276 and *dprA-mturquoise* by *NcoI* and *KpnI*, and the three fragments were ligated together to  
1277 generate pCJ2. The pCJ3 plasmid was generated by digesting the pMB42 plasmid with the  
1278 *XhoI* and *HindIII* enzymes to remove *gfp* and ligating in an *mTurquoise* PCR fragment amplified  
1279 from the R4011 strain<sup>67</sup> with CJ455-CJ456 primer pair, digested with the same restriction  
1280 enzymes. The pCJ4 plasmid was generated by amplifying two adjacent DNA fragments by PCR  
1281 on the R3728 strain<sup>66</sup> around *dprA-gfp* construct using primer pairs CJ391-CJ465 and CJ466-  
1282 CJ378 respectively. The three base mutations required to alter *gfp* to *yfp* present in both  
1283 primers CJ465 and CJ466. Splicing overlap extension (SOE) PCR on these two fragments with  
1284 the CJ391-CJ378 primer pair generated a DNA fragment with the *yfp* mutation. This DNA  
1285 fragment was transformed without selection into R3728<sup>66</sup> with a 3 h 30 min phenotypic  
1286 expression phase in liquid culture to introduce the *yfp* mutation, and positive clones were  
1287 determined by PCR amplification with the CJ391-CJ378 primer pair and sequencing with the  
1288 CJ378 primer. The pCJ5 plasmid was generated by digesting the pMB42 plasmid<sup>66</sup> with the  
1289 *EcoRI* and *XhoI* enzymes to remove '*dprA* and ligating in a '*recA* PCR fragment amplified from

1290 the R1501 strain with CJ764-CJ765 primer pair, digested with the same restriction enzymes.  
1291 The pCJ6 plasmid was generated by amplifying a PCR fragment consisting of the  $P_{lac}$  promoter  
1292 and upstream *lacI* gene from R4261<sup>66</sup> using primer pair CJ567-CJ615 and digesting it with *Sall*  
1293 and *NcoI* enzymes. A *dprA<sup>QNO</sup>-gfp* DNA fragment was amplified from R4046<sup>66</sup> using primer  
1294 pair CJ411-CJ616 and digested with *NcoI* and *BamHI* enzymes. The *pCEP<sub>R</sub>-luc* plasmid was  
1295 digested with *Sall* and *BamHI* enzymes and these three fragments were ligated together to  
1296 generate pCJ6. The pCJ7 plasmid was generated in the same manner but with an amplification  
1297 of a *dprA<sup>AR</sup>-gfp* DNA fragment was amplified from R4047<sup>66</sup> using primer pair CJ411-CJ616.  
1298 The R2546 strain (*comCO*, *CEP<sub>X</sub>-gfp*) was constructed by transforming R1501 with the pCN35  
1299 plasmid<sup>68</sup> and selecting for kanamycin resistance. The R3406 strain (*comCO*, *ssbB-luc*, *CEP<sub>M</sub>-*  
1300 *yfp-dnaX*) was generated by making four DNA fragments by PCR; a fragment of the upstream  
1301 CEP platform sequence from pCEP<sup>69</sup> with primer pair OVK53-OVK54; the *yfp* sequence from  
1302 R4404 with primer pair OVK55-OVK56; the *dnaX* sequence from R1501 with primer pair  
1303 OVK61-OVK62 and the downstream CEP platform sequence from pCEP<sup>69</sup> with primer pair  
1304 OVK57-OVK73. A SOE PCR fragment was generated using these four fragments with primer  
1305 pair OVK53-OVK73, and this was transformed into R1502, with transformants selected with  
1306 kanamycin. The R4062 strain (*comCO*, *dprA-mturquoise*) was generated by transforming  
1307 R1501 with the pCJ3 plasmid and selecting for spectinomycin resistance. The R4400 strain  
1308 (*comCO*, *CEP<sub>lac</sub>-dprA-gfp*, *ssbB::cat*) was generated by transforming R4262 with genomic DNA  
1309 from the R4812 strain and selecting for kanamycin resistance. The R4401 strain (*comCO*,  
1310 *CEP<sub>lac</sub>-dprA-gfp*, *comEC::ery*) was generated by transforming R4262 with genomic DNA from  
1311 the R2586 strain<sup>37</sup> and selecting for erythromycin resistance. The R4404 strain (*comCO*, *dprA-*  
1312 *yfp*) was generated by transforming R1501 with the pCJ4 plasmid and selecting for  
1313 spectinomycin resistance. The R4412 strain (*comCO*, *CEP<sub>lac</sub>-dprA<sup>QNO</sup>-gfp*) was generated by

1314 transforming R1501 with pCJ6 and selecting transformants with kanamycin. The R4413 strain  
1315 (*comC0*, *CEP<sub>lac</sub>-dprA<sup>AR</sup>-gfp*) was generated by transforming R1501 with pCJ7 and selecting  
1316 transformants with kanamycin. The R4415 strain (*comC0*, *CEP<sub>lac</sub>-dprA<sup>QNO</sup>-gfp*, *dprA::spc*) was  
1317 generated by transforming R4412 with genomic DNA from the R751 strain <sup>70</sup> and selecting for  
1318 spectinomycin resistance. The R4416 strain (*comC0*, *CEP<sub>lac</sub>-dprA<sup>AR</sup>-gfp*, *dprA::spc*) was  
1319 generated by transforming R4413 with genomic DNA from the R751 strain <sup>70</sup> and selecting for  
1320 spectinomycin resistance. The R4429 strain (*comC0*, *CEP<sub>lac</sub>-dprA-gfp*, *dprA::spc*, *recA::cat*) was  
1321 generated by transforming R4262 with genomic DNA from the R209 strain <sup>71</sup> in presence of  
1322 50 μM IPTG and selecting for chloramphenicol resistance. To generate the R4618 strain  
1323 (*comC0*, *CEP<sub>lac</sub>-dprA-gfp*, *dprA::spc*, *comEC::trim*, *recA::cat*), a *comEC::trim* DNA fragment was  
1324 created by initial amplification of the regions upstream and downstream of the *comEC* gene  
1325 using primer pairs CJ720-721 and CJ724-725 and R1501 gDNA as template. The trimethoprim  
1326 resistance cassette was amplified using the primer pair CJ722-723 and the R4107 strain <sup>66</sup> as  
1327 template. SOE PCR on these three fragments with the primer pair CJ720-725 generated a DNA  
1328 fragment with the *comEC* gene replaced with the trimethoprim resistance cassette, which  
1329 was co-transformed into R4262 with a *recA::cat* DNA fragment amplified from R209 <sup>71</sup> using  
1330 primer pair CJ726-CJ727. Transformants were selected with trimethoprim and  
1331 chloramphenicol to integrate both *comEC::trim* and *recA::cat* at the same time, since both  
1332 abrogate transformation. To generate the R4625 strain (*comC0*, *CEP<sub>lac</sub>-dprA-gfp*, *dprA::spc*,  
1333 *radA::trim*), a *radA::trim* DNA fragment was created by initial amplification of the regions  
1334 upstream and downstream of the *radA* gene using primer pairs CJ748-CJ749 and CJ752-oIM58  
1335 and R1501 gDNA as template. The trimethoprim resistance cassette was amplified using the  
1336 primer pair CJ750-751 and the R4107 strain <sup>66</sup> as template. SOE PCR on these three fragments  
1337 with the primer pair CJ748-oIM58 generated a DNA fragment with the *radA* gene replaced

1338 with the trimethoprim resistance cassette, which was transformed into R4262<sup>66</sup> in presence  
1339 of 50  $\mu$ M IPTG and transformants were selected with trimethoprim. To generate the R4626  
1340 strain (*comCO*, *ssbB-luc*, *CEP<sub>M</sub>-yfp-dnaX*, *CEP<sub>I</sub>lac-dprA-mTurquoise*), R3406 was transformed  
1341 with the pCJ2 plasmid, and transformants were selected with erythromycin. To generate the  
1342 R4631 strain (*comCO*, *ssbB-luc*, *CEP<sub>M</sub>-yfp-dnaX*, *CEP<sub>I</sub>lac-dprA-mTurquoise*, *dprA::spc*), R4626  
1343 was transformed with genomic DNA from strain R751 and transformants were selected with  
1344 spectinomycin. To generate strain R4664, a fragment of *CEP<sub>I</sub>lac* was amplified using primer pair  
1345 CJ588-CJ680 and R3833 as template, and the *recA* gene was amplified using primer pair CJ681-  
1346 CJ682 and R1501 as template. The pCEPlac-dprA-gfp plasmid was digested with *Sall* and  
1347 *Bam*HI restriction enzymes, while the DNA fragments were digested with *Sall/Nco*I and  
1348 *Nco*I/*Bam*HI respectively. These three fragments were ligated together and transformed into  
1349 R1501, with transformants selected with kanamycin. To generate strain R4712 (*comCO*, *recA*-  
1350 *mTurquoise*), R1501 was transformed with pCJ5 and transformants were selected with  
1351 spectinomycin. To generate strain R4716 (*comCO*, *CEP<sub>I</sub>lac-dprA-gfp*, *recA-mTurquoise*), R4261  
1352<sup>66</sup> was transformed with pCJ5 and transformants were selected with spectinomycin. To  
1353 generate strain R4731 (*comCO*, *CEP<sub>I</sub>lac-dprA-yfp*, *recA-mTurquoise*), two adjacent DNA  
1354 fragments were amplified by PCR on the R4262 strain<sup>66</sup> around *CEP<sub>I</sub>lac-dprA-gfp* construct  
1355 using primer pairs CJ114-CJ465 and CJ466-kan1 respectively. The three base mutations  
1356 required to alter *gfp* to *yfp* present in both primers CJ465 and CJ466. SOE PCR on these two  
1357 fragments with the CJ114-kan1 primer pair generated a DNA fragment with the *yfp* mutation.  
1358 This DNA fragment was transformed without selection into R4716 with a 3 h 30 min  
1359 phenotypic expression phase in liquid culture to introduce the *yfp* mutation, and positive  
1360 clones were determined by PCR amplification with the CJ114-kan1 primer pair and  
1361 sequencing with the CJ114 primer. To generate the R4742 strain (*comCO*, *CEP<sub>I</sub>lac-dprA-yfp*,

1362 *recA-mTurquoise, dprA::trim*), a *dprA::trim* DNA fragment was created by initial amplification  
1363 of the regions upstream and downstream of the *dprA* gene using primer pairs CJ373-CJ770  
1364 and CJ773-CJ378 and R1501 gDNA as template. The trimethoprim resistance cassette was  
1365 amplified using the primer pair CJ771-CJ772 and the R4107 strain<sup>66</sup> as template. SOE PCR on  
1366 these three fragments with the primer pair CJ373-CJ378 generated a DNA fragment with the  
1367 *dprA* gene replaced with the trimethoprim resistance cassette, which was transformed into  
1368 R4731 and transformants were selected with trimethoprim. The R4812 strain (*comCO*,  
1369 *ssbB::cat*) was generated by transforming R2294<sup>43</sup> with the *pEMcat* plasmid and  
1370 transformants were selected with chloramphenicol. To generate strain R4840, the regions  
1371 upstream and downstream of *dprA-mturquoise* in the CEP11 platform were amplified from  
1372 R4631 using primer pairs CJ662-CJ793 and CJ667-CJ796 respectively, and *recA-mturquoise*  
1373 was amplified from R4712 using primer pair CJ794-CJ795. SOE PCR using these three  
1374 fragments and primer pair CJ662-CJ667 generated a *CEP11-P<sub>lac</sub>-recA-mturquoise* DNA fragment  
1375 which was transformed into R3406, with transformants selected with erythromycin. To  
1376 generate strain R4848 (*comCO, CEP<sub>lac</sub>-recA-mturquoise*), 5' and 3' fragments of *CEP<sub>lac</sub>* were  
1377 amplified from R4262 with primer pairs CJ574-CJ799 and CJ802-CJ575 respectively, and *recA-*  
1378 *mturquoise* was amplified from R4712 using primer pair CJ800-CJ801. SOE PCR with these  
1379 DNA fragments and primer pair CJ574-CJ575 generated a *CEP<sub>lac</sub>-recA-mturquoise* fragment  
1380 which was transformed into R1501 and transformants were selected with kanamycin. To  
1381 generate strain R4849 (*comCO, dprA-lgbit*), 5' and 3' fragments of *dprA* were amplified from  
1382 R1501 with primer pairs CJ689-CJ690 and CJ693-CJ694, and the *lgbit* tag with appropriate  
1383 linker and overhang sequences for SOE PCR was synthesized based on previously-published  
1384 sequence optimized for the pneumococcus using gBlocks (Integrated DNA technologies). SOE  
1385 PCR with these DNA fragments and primer pair CJ689-CJ694 generated a *dprA-lgbit* fragment



1386 which was transformed into R1501 without selection and transformants were screened by  
1387 PCR for integration using primer pair CJ689-CJ694. To generate strains R4851 (*comC0*, *CEP<sub>lac</sub>-*  
1388 *recA-mturquoise*, *dprA::spc*), R4848 was transformed with chromosomal DNA from R751  
1389 (*rpsL41*, *dprA::spc*)<sup>70</sup> and transformants were selected with spectinomycin. To generate strain  
1390 R4856, a DNA fragment containing the *smbit* tag fused to the 3' end of the *dnaX* gene with a  
1391 linker, flanked by 5' and 3' sequences of *dnaX* was generated using gBlocks (Integrated DNA  
1392 technologies). 5' and 3' fragments of *dnaX* were amplified from R1501 with primer pairs  
1393 CJ809-CJ810 and CJ813-CJ814, and SOE PCR using these three DNA fragments and primer pair  
1394 CJ809-CJ814 generated a *dnaX-smbit* DNA fragment which was transformed into R1501  
1395 without selection and transformants were screened by PCR for integration using primer pair  
1396 CJ811-CJ812. To generate strain R4857 (*comC0*,  $\Delta$ *recA::trim*), upstream and downstream  
1397 sequences around the *recA* gene were amplified using primer pairs CJ829-CJ830 and CJ833-  
1398 CJ808 respectively, and the TrimR resistance cassette was amplified from strain R4107<sup>66</sup> using  
1399 primer pair CJ831-CJ832. A  $\Delta$ *recA::trim* DNA fragment was generated by SOE PCR using these  
1400 three DNA fragments and transformed into R1501, with transformants selected with  
1401 trimethoprim. To generate strain R4858 (*comC0*, *dprA-lgbit*, *CEP<sub>lac</sub>-dprA-smbit*), two DNA  
1402 fragments containing upstream and downstream sequences around the 3' end of *dprA* in  
1403 *CEP<sub>lac</sub>-dprA* were amplified from strain R4262 using primer pairs CJ574-CJ827 and CJ575-  
1404 CJ828 respectively, where primers CJ827 and CJ828 include the *linker-smbit* sequence. SOE  
1405 PCR using these two DNA fragments generated a *CEP<sub>lac</sub>-dprA-smbit* fragment, which was  
1406 transformed into R4849 and transformants were selected with kanamycin. To generate strain  
1407 R4859 (*comC0*, *dprA-lgbit*, *dnaX-smbit*, *hexA::ermAM*), R4856 cells were transformed with  
1408 genomic DNA from strain R246 (*hexA::ermAM*) and transformants were selected with  
1409 erythromycin. To generate strain R4861, R4859 cells were transformed with a *dprA<sup>AR</sup>* PCR



1410 fragment amplified from strain R2585<sup>24</sup> using primer pair CJ311-CJ391, and transformants  
1411 were screened by PCR and sequencing (Eurofins MWG) for insertion of the two independent  
1412 mutations conferring the dprA<sup>AR</sup> phenotype<sup>24</sup>.

1413

#### 1414 ***Time-lapse microfluidics experiments.***

1415 Time-lapse microfluidics experiments were carried out using a CellASIC ONIX  
1416 Microfluidic platform and B04A microfluidic plates (Merck-Millipore, Billerica, MA, U.S.A) as  
1417 previously described<sup>72</sup>, with modifications. Briefly, exponentially growing cultures (OD<sub>550</sub> 0,3)  
1418 of R4840 (*comCO*, *CEP<sub>M</sub>-yfp-dnaX*, *CEP<sub>II</sub>-P<sub>lac</sub>-recA-mturquoise*) were diluted 50-fold in C+Y  
1419 medium (supplemented with 300 U/mL catalase, 0.3 % maltose and 50 μM IPTG) and  
1420 incubated at 37 °C to an OD<sub>550</sub> of 0,1. Cells were then loaded into the microfluidic chamber  
1421 and maintained at 37 °C in a thermostated chamber with a constant flow rate of 0,3 μL/h  
1422 (0,25 psi). Competence induction was achieved by injecting CSP (1 μg mL<sup>-1</sup> in C+Y medium  
1423 with catalase, maltose and IPTG) for 3 min at 6 psi. DNA (250 ng μL<sup>-1</sup>, diluted in C+Y medium  
1424 with catalase, maltose and IPTG) was then injected for 6 min at 3 psi, followed by 1 h at 0.25  
1425 psi. Images were captured every minute throughout using the same microscope set-up as  
1426 described above, with a thermostated chamber at 37 °C.

1427

#### 1428 ***Sensitivity to DNA damage assays***

1429 Survival assays were performed as previously described<sup>56</sup>, with modifications. Briefly,  
1430 cells were grown to OD<sub>550</sub> 0.1 in C+Y medium (with 50 μM IPTG where appropriate) before  
1431 serial dilution and spotting of 10 μL volumes onto pre-dried plates containing 0.02 % MMS  
1432 and 50 μM IPTG where appropriate. After spot drying, plates were incubated overnight at 37  
1433 °C in a bell jar with Anaerocult A (Merck) to promote anaerobic conditions.

1434

1435 ***Fluorescent DNA microscopy experiments***

1436 Two independent DNA fragments (*rpsL1* and *radA::spc*) were used to test  
1437 internalization of transforming DNA, *rpsL1*, conferring streptomycin resistant via point  
1438 mutation, or *radA::spc*, conferring spectinomycin resistance by integration of a heterologous  
1439 cassette. A 2,008 bp DNA fragment containing *rpsL1* was amplified from R2980 (*dpnMAB*,  
1440 *rpsL1*) using primer pair MB83-MB84. A 4,649 bp DNA fragment containing *radA::spc* was  
1441 amplified from R3255 (*dpnMAB*, *hexA::ermAM*, *radA::spc*, *ssbB::kan*) using primer pair CJ338-  
1442 CJ368. Strains possessing the *DpnII* restriction system were used as templates to allow  
1443 template removal by *DpnI* digestion. PCR fragments were labelled with either fluorescein,  
1444 Dylight 550 or Dylight 650. For fluorescein labelling, 1  $\mu\text{L}$  of 1 mM fluorescein-12-dUTP  
1445 (Thermo Fisher Scientific), 2  $\mu\text{L}$  dNTP mix (1 mM dATP, dCTP, and dGTP and 0.5 mM dTTP  
1446 (Thermo Fisher Scientific)), 0.5  $\mu\text{L}$  DreamTaq DNA polymerase (Thermo Fisher Scientific), 5  $\mu\text{L}$   
1447 DreamTaq buffer, 1  $\mu\text{M}$  of each primer and 2  $\mu\text{L}$  of genomic DNA were used in a total reaction  
1448 mixture volume of 50  $\mu\text{L}$ . The reaction conditions for Dylight labelling were the same as for  
1449 fluorescein, but with 1  $\mu\text{L}$  of dNTP mixture (10 mM dGTP, dCTP, and dATP and 5 mM dTTP and  
1450 aminoallyl-dUTP (Thermo Fisher Scientific)). After labelling, samples were protected from  
1451 light throughout. Samples were then mixed 4:1 with Dylight 550 or 650 (10 mg  $\text{mL}^{-1}$ , Thermo  
1452 Fisher Scientific) and incubated at room temperature for 3 hours. Samples were then  
1453 incubated for 2 h with 0.5  $\mu\text{L}$  *DpnI* (20 U  $\mu\text{L}^{-1}$ , FastDigest, Thermo Fisher Scientific) per 50  $\mu\text{L}$   
1454 PCR sample. Label incorporation was calculated using a NanoDrop (Thermo Fisher Scientific)  
1455 as follows: fluorescein, 0,3-1,6 pmol  $\mu\text{L}^{-1}$ ; Dylight 550 and 650, 0,9-4,4 pmol  $\mu\text{L}^{-1}$ . Microscopy  
1456 images were captured as described above using FITC (fluorescein), Cy3 (Dylight 550) and Cy5  
1457 (Dylight 650) filters respectively.

1458

1459 **Supplementary Results**

1460 ***Exploring the visualization of fluorescent tDNA during pneumococcal transformation.***

1461 In this study, fluorescent fusions of DprA and RecA were used to visualize the early HR  
1462 intermediates in actively growing pneumococci. The other main actor of early HR  
1463 intermediates is ssDNA, and the possibility of visualizing fluorescent transforming ssDNA in *B.*  
1464 *subtilis* and *S. pneumoniae* has previously been explored, showing fluorescent foci on cells  
1465 after DNase I treatment<sup>47</sup>. However, a further study in *B. subtilis* showed that resistance to  
1466 DNase I does not necessarily indicate entry into the cytoplasm, but rather the periplasm<sup>19</sup>. In  
1467 light of this, the potential of using such fluorescent DNA to visualize early HR intermediates  
1468 during transformation was explored in *S. pneumoniae*. To begin, the transformation efficiency  
1469 of labelled DNA fragments possessing an *rpsL41* point mutation<sup>73</sup> was compared to  
1470 unlabelled controls with dUTP/dTTP mix or dTTP alone. Results showed that the dUTP/dTTP  
1471 unlabelled mix showed reduced transformation efficiency compared to dTTP alone, while  
1472 labelled DNA fragments showed similar or slightly reduced transformation efficiency  
1473 compared to the dUTP/dTTP unlabelled mix (**Extended Figure 7A**). This suggested that  
1474 fluorescent DNA could be internalised, however, internalization and integration of short  
1475 unlabelled fragments around the point mutation could not be excluded. Fluorescence  
1476 microscopy on competent cells transforming with labelled DNA fragments showed distinct  
1477 foci associated to a minority of cells (**Extended Figure 7B**). To further explore whether  
1478 fluorescently labelled DNA could be internalized by competent cells, transformation  
1479 experiments were carried out using DNA fragments possessing a point mutation as above  
1480 (*rpsL1*, otherwise homologous DNA) or a heterologous antibiotic resistance cassette flanked  
1481 by homologous sequences (*radA::spc*), labelled or not with Dylight 500 or 650, at varying DNA

1482 concentrations. Unlike a point mutation, integration of a heterologous cassette requires  
1483 transfer of the entire cassette plus flanking sequences, making the presence of entirely  
1484 unlabelled fragments of transformable DNA much less likely. Results show that while reducing  
1485 the concentration of *rpsL1* DNA below saturating levels did not alter the ratio between  
1486 transformation efficiency of labelled and unlabelled DNA donors, reducing the concentration  
1487 of *radA::spc* donor DNA specifically reduced the transformation efficiency of labelled DNA,  
1488 increasing the ratio of transformation efficiency between labelled and unlabelled DNA  
1489 (Extended Figure 7CD). This result suggests that high levels of fluorescent labelling negatively  
1490 impacted the transformation of a donor DNA molecule, but that nonetheless, less labelled  
1491 donor DNA can be internalized and integrated into the recipient chromosome by  
1492 transformation. To explore whether it was possible to visualize this subpopulation of  
1493 transforming DNA, fluorescence microscopy was carried out on wildtype cells in the presence  
1494 or absence of CSP, as well as in several transformasome mutant strains. Results show that in  
1495 wildtype cells, although foci are observed in non-competent cells, competence specific foci  
1496 are observed (Extended Figure 7E). The absence of the pilus (*comGA*<sup>-</sup>), the EndA nuclease  
1497 (*endA*<sup>-</sup>) or the transformation-dedicated recombinase loader (*dprA*<sup>-</sup>) did not alter the number  
1498 of competent cells possessing foci despite being key for capture, processing and protection  
1499 of transforming DNA, respectively. However, a reducing in cells possessing foci was observed  
1500 in the absence of the DNA transformation pore (*comEC*<sup>-</sup>), while removing the DNA receptor  
1501 (*comEA*<sup>-</sup>) reduced the number of cells possessing foci to non-competent levels (Extended  
1502 Figure 7E). The localization of foci did not vary significantly in all of these strains (Extended  
1503 Figure 7F). In conclusion, although it appears DNA molecules possessing fewer fluorescent  
1504 tags can be transformed, visualisation of these is not possible due to the pollution from DNA

1505 molecules with greater numbers of fluorescent tags, which are not transformable and thus

1506 remain on the outside of the cell.

1507

1508

1509

1510

1511

1512

1513

1514

1515

1516

1517

1518

1519

1520

1521

1522

1523

1524

1525

1526

1527

1528
